# Supplementary material for: Uptake epithelia behave in a cell-centric and not systems homeostatic manner in response to zinc depletion and supplementation
Source: Royal Society of Chemistry journal article supplement (doi:10.1039/c3mt00212h), 2013-10-29
Supplement: c3mt00212h.pdf [file c3mt00212h.pdf]

**Table S1** The whole body moisture, ash and protein content of the fish (% of dry weight)

| Component | baseline (%) | After 21 days |                  |               |
|-----------|--------------|---------------|------------------|---------------|
|           |              | Deficient (%) | Control Zinc (%) | High Zinc (%) |
| Protein   | 53.85±3.48   | 57.58±3.31    | 56.20±4.88       | 53.61±15.01   |
| Ash       | 10.89±2.02   | 10.85±3.7     | 11.47±1.53       | 11.86±2.49    |
| Moisture  | 68.61±2.72   | 72.04±2.87    | 70.00±3.90       | 71.93±3.66    |
