# Supplementary material for: Uptake epithelia behave in a cell-centric and not systems homeostatic manner in response to zinc depletion and supplementation
Source: Royal Society of Chemistry journal article supplement (doi:10.1039/c3mt00212h), 2013-10-29
Supplement: c3mt00212h.xlsx [file c3mt00212h.xlsx]

## Sheet: S2A_Gill_ContVsExc
Systematic ID	Control		Deficiency		Excess		t-test	ENSEMBL				NBCI		ZFIN			Human Orthologues
	Normalized	SE	Normalized	SE	Normalized	SE	p	Transcript	Gene	map	sense	Unigene	gb	ID	Symbol	Description	Description	Symbol	Entrez Gene ID
AB006322	1.01016	0.0622418	1.03365	0.0894411	1.25743	0.0534918	0.0746	ENSDART00000002309	ENSDARG00000017121	23:3420382-3423555	-1	Dr.75475	AL913195	ZDB-GENE-980526-515	mafba	v-maf musculoaponeurotic fibrosarcoma oncogene family, protein B (avian)	v-maf musculoaponeurotic fibrosarcoma oncogene homolog B (avian)	MAFB
AB030901	1.05234	0.0531101	0.824989	0.0523386	0.663263	0.0878747	0.0746	ENSDART00000058834	ENSDARG00000063583	3:11498024-11522873	-1	Dr.82506	CO354494	ZDB-GENE-060512-98	map2k4a	mitogen-activated protein kinase kinase 4a	mitogen-activated protein kinase kinase 4	MAP2K4	6125
AF057040	1.03426	0.0850978	1.27446	0.136152	1.65308	0.170425	0.0746	ENSDART00000054987	ENSDARG00000037746	1:7725183-7728816	-1	Dr.35143	NM_131031	ZDB-GENE-000329-1	actb1	actin, beta 1	actin, beta	ACTB	9935
AF111712	0.950608	0.113551	0.62056	0.0937351	0.572778	0.0789104	0.0746	ENSDART00000067138	ENSDARG00000045660	25:26429998-26441157	-1	Dr.75439	AL725619	ZDB-GENE-030620-1	hic1l				6416
AF231127	1.02126	0.0411071	1.0598	0.106731	0.764006	0.0611223	0.0746	ENSDART00000000070	ENSDARG00000000069	24:22678238-22711533	-1	Dr.75963	AW566560	ZDB-GENE-000511-3	dap	death associated protein	death-associated protein	DAP	60
AI106503	1.01567	0.0555142	0.938292	0.0441263	0.759916	0.0531517	0.0746	ENSDART00000060166	ENSDARG00000041068	18:20959432-20969479	-1	Dr.17618	BG307496	ZDB-GENE-040426-2703	got2a	glutamic-oxaloacetic transaminase 2a, mitochondrial (aspartate aminotransferase 2)	glutamic-oxaloacetic transaminase 2, mitochondrial (aspartate aminotransferase 2)	GOT2	60
AI330588	0.9505	0.0955922	1.16798	0.127465	1.36253	0.102641	0.0746					Dr.76259	AI330588	ZDB-GENE-070410-115	zgc:162939	zgc:162939	chromosome 9 open reading frame 3	C9orf3	3223
AI353244	1.06227	0.0853445	0.828981	0.040128	0.739382	0.0542981	0.0746	ENSDART00000122388	ENSDARG00000038401	3:5651654-5669392	1
AI384371	0.999051	0.0555956	1.42959	0.100395	1.33787	0.0913887	0.0746					Dr.121633	AI384862	ZDB-GENE-030131-8406	wu:fb11c02				1611
AI437062	1.02805	0.0657186	1.8325	0.151254	1.51512	0.152623	0.0746	ENSDART00000128250	ENSDARG00000023214	25:23583174-23612754	-1	Dr.121622	AI384213						2806
AI477659	1.104	0.105181	0.761177	0.135961	0.659293	0.0888406	0.0746	ENSDART00000104074	ENSDARG00000058462	6:39267595-39275123	-1	Dr.4854	AW019046	ZDB-GENE-070209-50	zgc:158846				84909
AI522803	1.03383	0.0891673	0.982623	0.135914	0.536655	0.0926653	0.0746	ENSDART00000034545	ENSDARG00000043173	22:7518342-7521632	1	Dr.34133	AI522803	ZDB-GENE-040801-12	zgc:92745
AI558502	0.975016	0.056794	0.944536	0.098063	1.29199	0.102967	0.0746	ENSDART00000077496	ENSDARG00000044669	11:38778051-38795065	1	Dr.121739	AI544971	ZDB-GENE-060810-79	hp1bp3	heterochromatin protein 1, binding protein 3	heterochromatin protein 1, binding protein 3	HP1BP3
AI584903	0.980738	0.0563821	0.974829	0.0747425	0.785254	0.0391089	0.0746	ENSDART00000008854	ENSDARG00000021343	15:30459335-30474876	-1	Dr.33037	AI584903	ZDB-GENE-030131-1946	wsb1	WD repeat and SOCS box-containing 1	WD repeat and SOCS box-containing 1	WSB1
AI588294	1.13506	0.152624	1.08166	0.0460368	0.736285	0.0584996	0.0746					Dr.77761	AI588294	ZDB-GENE-061103-52	mtmr10	myotubularin related protein 10	myotubularin related protein 10	MTMR10
AI601765	0.946656	0.0835746	0.769911	0.0580114	0.655713	0.0545838	0.0746	ENSDART00000110646	ENSDARG00000017843	21:38403760-38412580	-1	Dr.77384	EB974893	ZDB-GENE-040426-1467	srsf1b	serine/arginine-rich splicing factor 1b	serine/arginine-rich splicing factor 1	SRSF1
AI641077	0.874106	0.144653	1.36985	0.115504	1.53618	0.190825	0.0746	ENSDART00000105717	ENSDARG00000071475	22:14227844-14259407	-1	Dr.35853	AI641077	ZDB-GENE-001205-2	aox3				80305
AI641570	0.992155	0.0513222	1.24479	0.0974639	1.27097	0.059479	0.0746												50809
AI793700	1.01853	0.348222	0.385537	0.0458474	0.36269	0.0682061	0.0746					Dr.78989	EE206236	ZDB-GENE-030131-3751	wu:fc51h02				26118
AI878424	1.08102	0.103773	1.22689	0.190822	0.681143	0.084833	0.0746					Dr.52681	AI878424						54893
AI878772	0.97858	0.0773457	1.19495	0.0644238	1.53443	0.185209	0.0746	ENSDART00000066084	ENSDARG00000018889	6:4243839-4275557	1	Dr.79168	AI878772	ZDB-GENE-050706-50	zgc:109736				6426
AI958897	0.973797	0.0597846	0.750699	0.146976	0.634282	0.0638391	0.0746	ENSDART00000148920	ENSDARG00000025346	25:22386839-22414498	1	Dr.18503	AI958897	ZDB-GENE-040426-1633	znf277	zinc finger protein 277	zinc finger protein 277	ZNF277
AI959512	1.02589	0.0831885	0.957253	0.0951894	0.742728	0.0516835	0.0746	ENSDART00000112167	ENSDARG00000075323	19:29778946-29786543	-1	Dr.150460	BC165299	ZDB-GENE-040426-1991	zgc:56062
AI959704	1.06609	0.0597201	1.89082	0.308817	1.47598	0.135126	0.0746					Dr.75245	AI544991
AI965244	0.975431	0.107284	0.917263	0.105734	0.643413	0.0530043	0.0746	ENSDART00000112417	ENSDARG00000078497	11:3195071-3229802	1	Dr.57903	EB970854	ZDB-GENE-030131-8978	timeless
AJ001423	0.936986	0.0827518	0.45788	0.103722	0.5634	0.0894998	0.0746	ENSDART00000123700	ENSDARG00000024829	2:35230256-35287771	-1	Dr.104489	EB796230	ZDB-GENE-990415-262	tnw	tenascin W	tenascin N	TNN	6928
AL591442	1.0163	0.0870929	0.700597	0.113697	0.556742	0.0769757	0.0746	ENSDART00000061132	ENSDARG00000079593	8:45768098-45769605	-1
AW018735	0.898162	0.0909569	0.74462	0.113132	0.592568	0.0603044	0.0746	ENSDART00000057377	ENSDARG00000039269	13:33248149-33257976	1	Dr.77297	EE201197	ZDB-GENE-030131-1334	arg2	arginase, type II	arginase, type II	ARG2
AW018950	0.925592	0.153048	0.646961	0.234935	0.400378	0.0595378	0.0746	ENSDART00000105634	ENSDARG00000094496	22:24273936-24285641	1	Dr.104840	EH530202	ZDB-GENE-030131-251	cfhl4	complement factor H like 4	complement factor H-related 2	CFHR2
AW019149	1.02158	0.0955468	0.961408	0.129068	0.679015	0.0785103	0.0746					Dr.132655	BI878161	ZDB-GENE-030131-4789	wu:fd60d11
AW019701	0.926422	0.141598	0.666848	0.130273	0.43898	0.103007	0.0746	ENSDART00000087976	ENSDARG00000061585	14:30845056-30857343	1	Dr.80050	BQ419823	ZDB-GENE-061103-88	cyp4v7
AW019798	0.96236	0.151037	1.06508	0.239807	0.452819	0.0846858	0.0746	ENSDART00000053001	ENSDARG00000036481	5:28440014-28450649	1	Dr.132672	BI879259	ZDB-GENE-030131-4648	si:ch211-102c2.6
AW059370	0.922778	0.065709	0.783824	0.107546	0.640783	0.0675244	0.0746	ENSDART00000017965	ENSDARG00000012574	1:50115503-50154867	-1	Dr.110237	AI558918	ZDB-GENE-030131-1684	slkb	STE20-like kinase b	STE20-like kinase	SLK	11179
AW076850	0.945545	0.165786	1.30738	0.18948	1.86668	0.272528	0.0746	ENSDART00000100298	ENSDARG00000069106	10:27470888-27499497	1	Dr.22344	AW076850
AW078445	1.03341	0.166871	0.822635	0.103277	2.28199	0.33023	0.0746	ENSDART00000080344	ENSDARG00000057629	19:48267629-48286476	-1	Dr.106505	AW058874	ZDB-GENE-060315-10	slc30a8	solute carrier family 30 (zinc transporter), member 8	solute carrier family 30 member 8	SLC30A8
AW115515	0.956815	0.0786892	0.917045	0.0660514	1.43425	0.162754	0.0746	ENSDART00000041402	ENSDARG00000001953	4:24560099-24572537	-1	Dr.78868	CT641496	ZDB-GENE-040426-2724	pfkfb3	6-phosphofructo-2-kinase/fructose-2,6-biphosphatase 3	6-phosphofructo-2-kinase/fructose-2,6-biphosphatase 3	PFKFB3	37
AW115809	0.934913	0.0553119	0.880465	0.0953854	0.681304	0.058653	0.0746	ENSDART00000023833	ENSDARG00000008292	24:17532434-17552055	1	Dr.76044	EV605525	ZDB-GENE-030131-5552	eif2s3	eukaryotic translation initiation factor 2, subunit 3 gamma	eukaryotic translation initiation factor 2, subunit 3 gamma, 52kDa	EIF2S3
AW116060	0.997051	0.0792168	0.855236	0.104629	0.658649	0.0743744	0.0746	ENSDART00000057605	ENSDARG00000039429	13:25142484-25423150	-1	Dr.76313	AW019190	ZDB-GENE-030425-3	adka	adenosine kinase a	adenosine kinase	ADK
AW116724	1.0115	0.0745974	0.884482	0.0818092	0.789897	0.0359476	0.0746					Dr.79154	AW116724	ZDB-GENE-040724-45	si:busm1-122b7.1				63923
AW117160	0.969747	0.0786307	1.11973	0.0845368	1.28432	0.0747662	0.0746	ENSDART00000137006	ENSDARG00000092997	10:36765367-36773635	1	Dr.152342	CT725060
AW128548	1.00887	0.0641034	1.05622	0.0829416	0.76469	0.0469578	0.0746												384
AW154475	0.93403	0.136069	0.646567	0.092368	0.554638	0.0545793	0.0746	ENSDART00000005906	ENSDARG00000019973	8:26443784-26458480	-1	Dr.18403	AW154475	ZDB-GENE-040426-2811	stk38a	serine/threonine kinase 38a	serine/threonine kinase 38	STK38	3080
AW170898	1.0026	0.112375	1.88905	0.280785	1.92998	0.326572	0.0746	ENSDART00000024722	ENSDARG00000010571	24:17894626-17913559	1	Dr.76424	AW595546	ZDB-GENE-041111-259	ezh2	enhancer of zeste homolog 2 (Drosophila)	enhancer of zeste homolog 2 (Drosophila)	EZH2
AW170971	0.983462	0.104581	0.978007	0.0260543	1.64173	0.186219	0.0746	ENSDART00000010626	ENSDARG00000001777	10:1623969-1663150	-1	Dr.14749	BM082893	ZDB-GENE-040426-711	nup155	nucleoporin 155	nucleoporin 155kDa	NUP155
AW171471	0.883584	0.10941	0.594678	0.066808	0.504392	0.059086	0.0746	ENSDART00000026339	ENSDARG00000018961	2:42462491-42476393	-1	Dr.77165	BQ615052	ZDB-GENE-030131-5982	gtpbp4	GTP binding protein 4	GTP binding protein 4	GTPBP4
AW174685	0.977318	0.0439712	1.30565	0.104262	1.2654	0.0865253	0.0746	ENSDART00000129870	ENSDARG00000040184	20:2760607-2771761	1	Dr.75407	AL906176	ZDB-GENE-030131-4862	syncrip	synaptotagmin binding, cytoplasmic RNA interacting protein	synaptotagmin binding, cytoplasmic RNA interacting protein	SYNCRIP	9748
AW175426	0.871674	0.10271	0.744563	0.199893	0.517651	0.0559303	0.0746												170591
AW184187	1.11726	0.362286	0.820479	0.264382	8.31347	6.74686	0.0746	ENSDART00000061007	ENSDARG00000041623	18:17193795-17195147	1	Dr.121290	BQ261526	ZDB-GENE-030131-4174	mt2
AW232428	0.952604	0.082451	1.15877	0.134233	1.35397	0.114281	0.0746					Dr.80913	AW232428
AW233667	0.978801	0.0900784	0.73311	0.0951339	0.696985	0.0469952	0.0746					Dr.81041	AW233667						169026
AW281287	1.0405	0.0859713	0.943906	0.0686755	0.723728	0.0732577	0.0746	ENSDART00000134268	ENSDARG00000054191	21:36773017-36779457	1	Dr.76033	EH449840	ZDB-GENE-040426-2711	pgk1	phosphoglycerate kinase 1	phosphoglycerate kinase 1	PGK1	5209
AW420629	0.896725	0.0961239	0.86872	0.0554068	1.3306	0.0661088	0.0746					Dr.77741	AW420629	ZDB-GENE-030131-9516	lyve1	lymphatic vessel endothelial hyaluronic acid receptor 1	lymphatic vessel endothelial hyaluronan receptor 1	LYVE1	1968
AW510092	0.984961	0.119201	1.24882	0.114925	1.88542	0.31047	0.0746					Dr.121613	AI331847						132
AW595239	0.990215	0.0424824	0.894956	0.0859404	0.654618	0.0606596	0.0746	ENSDART00000125739	ENSDARG00000070217	23:39889893-40047376	-1	Dr.76088	CO359328	ZDB-GENE-060825-325	minos1	mitochondrial inner membrane organizing system 1	mitochondrial inner membrane organizing system 1	MINOS1
AW826969	1.04073	0.118153	0.844701	0.0978771	0.710373	0.0522164	0.0746
BE200655	0.974177	0.106712	0.651752	0.0962781	0.636626	0.0594347	0.0746	ENSDART00000036886	ENSDARG00000005476	4:19823020-19855953	1	Dr.75272	AL919560	ZDB-GENE-021205-1	nav3	neuron navigator 3	neuron navigator 3	NAV3
BE557760	0.967689	0.0893784	0.883793	0.0404018	0.717239	0.0373454	0.0746	ENSDART00000012143	ENSDARG00000059000	2:3962396-3964308	1	Dr.82044	BG799307	ZDB-GENE-040912-153	cyp8b3				11329
BE605391	0.976872	0.0692694	1.22513	0.0883617	1.4543	0.100523	0.0746	ENSDART00000066439	ENSDARG00000045190	12:18109709-18110818	1	Dr.82220	EB767829	ZDB-GENE-041212-81	ch25h	cholesterol 25-hydroxylase	cholesterol 25-hydroxylase	CH25H	2146
BF157776	1.03393	0.0632958	1.03196	0.192301	0.685195	0.0824163	0.0746	ENSDART00000045311	ENSDARG00000030752	11:45891512-45900335	1	Dr.67086	EB860646	ZDB-GENE-070424-19	syngr2b	synaptogyrin 2b	synaptogyrin 2	SYNGR2	9631
BF717352	0.941182	0.119733	0.977343	0.153002	1.46219	0.13228	0.0746	ENSDART00000080740	ENSDARG00000057973	15:25245308-25423857	-1	Dr.116618	EB870480	ZDB-GENE-050417-411	dph1	DPH1 homolog (S. cerevisiae)	DPH1 homolog (S. cerevisiae)	DPH1	23560
BF717695	0.958885	0.0666995	0.946156	0.0903748	1.52279	0.211507	0.0746	ENSDART00000050006	ENSDARG00000033662	12:49688998-49699500	1	Dr.105241	CD015034	ZDB-GENE-031106-3	scd	stearoyl-CoA desaturase (delta-9-desaturase)	stearoyl-CoA desaturase (delta-9-desaturase)	SCD	10492
BG303312	0.946059	0.0782765	0.663241	0.0547177	0.642224	0.0668075	0.0746	ENSDART00000021814	ENSDARG00000013489	15:6532407-6546523	-1	Dr.94421	BI709416	ZDB-GENE-051120-21	zgc:123178
BG304198	1.01957	0.0393825	0.968192	0.101986	1.88666	0.342193	0.0746	ENSDART00000067078	ENSDARG00000025902	11:25398965-25471874	-1	Dr.122708	BG304198
BG306190	0.998867	0.0749747	1.32972	0.0900044	1.47427	0.155484	0.0746	ENSDART00000114322	ENSDARG00000078125	16:15791468-15824231	1	Dr.82917	EE210111
BG729245	0.903005	0.118936	0.983463	0.152347	1.40819	0.108851	0.0746					Dr.132201	AI522396	ZDB-GENE-990415-114	hoxc8a	homeo box C8a	homeo box C8	HOXC8
BG884568	0.927066	0.0860099	0.918832	0.0654969	0.655629	0.0487681	0.0746	ENSDART00000110058	ENSDARG00000074756	17:11921921-11936767	1	Dr.36376	BI326613	ZDB-GENE-070521-3	tfb2m	transcription factor B2, mitochondrial	transcription factor B2, mitochondrial	TFB2M	5230
BG884572	0.913286	0.0577931	0.765188	0.0973197	1.24494	0.0679521	0.0746	ENSDART00000112061	ENSDARG00000074169	12:33191100-33221664	1
BG985575	0.878596	0.101611	1.08164	0.157019	1.28672	0.0904364	0.0746	ENSDART00000110076	ENSDARG00000077298	5:46112804-46115387	-1	Dr.159519	DV593103	ZDB-GENE-050302-155	gas1a	growth arrest-specific 1a	growth arrest-specific 1	GAS1	10894
BI325955	0.988307	0.113083	1.36797	0.186958	1.84599	0.346027	0.0746	ENSDART00000111622	ENSDARG00000079652	7:76839584-76844705	-1	Dr.15812	BI325955						29089
BI326537	0.991529	0.0579631	0.931927	0.070602	1.32837	0.111228	0.0746	ENSDART00000077839	ENSDARG00000055481	6:39545945-39562028	-1	Dr.115346	BI326537	ZDB-GENE-030131-3028	atf7b	activating transcription factor 7b	activating transcription factor 7	ATF7	53981
BI427813	0.976946	0.0900893	0.843554	0.0485924	0.604727	0.0854107	0.0746	ENSDART00000147578	ENSDARG00000063076	22:10663878-10669122	1	Dr.81913	AW778336	ZDB-GENE-050208-331	atrip	ATR interacting protein	ATR interacting protein	ATRIP
BI430377	0.939138	0.0894167	1.72472	0.315854	2.03672	0.483488	0.0746	ENSDART00000133441	ENSDARG00000019501	21:26970152-27014095	-1	Dr.69681	BG892073	ZDB-GENE-050809-89	im:7160157				440574
BI475833	1.00411	0.0362789	1.20415	0.154261	1.49383	0.132209	0.0746	ENSDART00000090371	ENSDARG00000062472	8:14728697-14755974	-1	Dr.74013	BI475833	ZDB-GENE-030131-8264	sin3b	SIN3 homolog B, transcription regulator (yeast)	SIN3 homolog B, transcription regulator (yeast)	SIN3B
BI671189	0.951437	0.0973122	0.681374	0.157433	0.530761	0.0615537	0.0746	ENSDART00000146276	ENSDARG00000094857	17:16714656-16717991	1	Dr.12949	BI880829	ZDB-GENE-030327-4	dio2
BI673998	0.971906	0.0777237	1.09613	0.133208	0.738061	0.0347062	0.0746	ENSDART00000058161	ENSDARG00000039778	13:52105009-52207985	1	Dr.83526	BI673765						89795
BI704253	1.00212	0.0913451	0.686158	0.145355	0.559942	0.0948025	0.0746	ENSDART00000003845	ENSDARG00000016771	2:16581416-16592909	-1	Dr.75658	EB854504	ZDB-GENE-980526-35	tfa	transferrin-a	transferrin	TF
BI704370	0.910891	0.113169	0.929108	0.141344	1.85111	0.375867	0.0746	ENSDART00000027616	ENSDARG00000020377	7:67327490-67347861	-1	Dr.29749	CT624957	ZDB-GENE-030131-2173	eif4g2a	eukaryotic translation initiation factor 4, gamma 2a	eukaryotic translation initiation factor 4 gamma, 2	EIF4G2	9023
BI704944	1.04292	0.0582753	1.08671	0.0604181	1.35101	0.100418	0.0746	ENSDART00000080286	ENSDARG00000057590	22:15791243-15839279	-1	Dr.81922	BM858879						9144
BI707054	1.10316	0.171705	0.648653	0.0384004	0.662709	0.0601332	0.0746					Dr.115454	BM081462						1801
BI842451	1.0101	0.0867901	1.51324	0.22996	1.80713	0.199841	0.0746					Dr.123195	BI842258
BI846588	0.937776	0.0787929	1.01369	0.128298	1.29326	0.105367	0.0746					Dr.14210	BI846588						6319
BI846981	0.914383	0.118847	1.01503	0.158504	1.40628	0.122136	0.0746	ENSDART00000042209	ENSDARG00000025789	16:33998668-34013093	-1	Dr.75373	EX159296	ZDB-GENE-030131-4532	chd4b	chromodomain helicase DNA binding protein 4b	chromodomain helicase DNA binding protein 4	CHD4
BI864031	0.9027	0.0722918	1.11583	0.174242	1.55649	0.226123	0.0746	ENSDART00000093113	ENSDARG00000063612	12:3256044-3322913	1	Dr.84323	BI863862
BI864051	0.969847	0.0712274	0.657318	0.0371209	0.599809	0.0928241	0.0746					Dr.13412	BI863880						1827
BI866969	0.999978	0.0967053	0.80684	0.129944	1.67635	0.230761	0.0746	ENSDART00000134618	ENSDARG00000095632	1:19312466-19334123	-1
BI878214	0.943295	0.123669	1.35578	0.195811	1.58505	0.191951	0.0746	ENSDART00000090370	ENSDARG00000041294	3:62823514-62831176	1	Dr.42641	BI878214	ZDB-GENE-030131-9700	noxo1a	NADPH oxidase organizer 1a	NADPH oxidase organizer 1	NOXO1	23603
BI878269	1.03007	0.116678	1.43481	0.391398	2.23066	0.335168	0.0746	ENSDART00000102274	ENSDARG00000076839	15:505347-515644	1	Dr.106782	BM533610	ZDB-GENE-060929-108	zgc:153258				3224
BI878613	0.978321	0.0646875	1.11395	0.186722	1.34982	0.103039	0.0746	ENSDART00000046618	ENSDARG00000021466	25:6580987-6614889	-1	Dr.158648	EH570085						64216
BI878712	1.01428	0.129827	0.760103	0.117729	0.573428	0.0760442	0.0746	ENSDART00000129878	ENSDARG00000018508	5:19701184-19827187	1	Dr.12720	CT634348	ZDB-GENE-030407-3	zdhhc8b	zinc finger, DHHC-type containing 8b	zinc finger, DHHC-type containing 8	ZDHHC8
BI878743	0.979277	0.130492	0.641636	0.225812	0.546562	0.0580861	0.0746	ENSDART00000084867	ENSDARG00000060320	13:36810924-36840775	-1	Dr.130167	EB891121
BI879019	0.971203	0.139778	1.36401	0.103427	1.97748	0.311559	0.0746	ENSDART00000122116	ENSDARG00000031600	20:13890757-13914838	1								2619
BI879523	0.996696	0.146519	2.00274	0.448638	1.73346	0.113618	0.0746	ENSDART00000006604	ENSDARG00000020679	3:34214809-34221668	-1	Dr.76726	AW233522	ZDB-GENE-030131-7860	clpp	ClpP caseinolytic peptidase, ATP-dependent, proteolytic subunit homolog (E. coli)	ClpP caseinolytic peptidase, ATP-dependent, proteolytic subunit homolog (E. coli)	CLPP
BI879707	1.00041	0.0968927	0.890724	0.0642449	0.65098	0.0607552	0.0746	ENSDART00000105734	ENSDARG00000056511	10:27440226-27444325	1	Dr.82729	EB840268	ZDB-GENE-040718-102	arr3a	arrestin 3a, retinal (X-arrestin)	arrestin 3, retinal (X-arrestin)	ARR3
BI880302	0.962353	0.0595907	1.29555	0.11184	1.34842	0.10906	0.0746	ENSDART00000129339	ENSDARG00000037965	3:32774399-32787254	1	Dr.82712	BF938327	ZDB-GENE-050522-399	srrm2	serine/arginine repetitive matrix 2	serine/arginine repetitive matrix 2	SRRM2	11016
BI883197	0.970937	0.043255	0.864731	0.147559	1.6939	0.265196	0.0746	ENSDART00000030444	ENSDARG00000028346	5:12929285-12952804	1	Dr.39283	BI883197	ZDB-GENE-040426-2632	tesca	tescalcin a	tescalcin	TESC	84126
BI885984	1.04934	0.133299	0.876168	0.114611	0.651514	0.0557996	0.0746	ENSDART00000128222	ENSDARG00000009871	6:54385939-54391060	-1	Dr.18318	AW174763	ZDB-GENE-020419-26	snrpc	small nuclear ribonucleoprotein polypeptide C	small nuclear ribonucleoprotein polypeptide C	SNRPC
BI887500	1.02761	0.0565983	0.950125	0.180772	1.24463	0.045949	0.0746	ENSDART00000055238	ENSDARG00000037897	3:36732826-36762973	1	Dr.79522	EE212537	ZDB-GENE-030131-7582	rogdi	rogdi homolog (Drosophila)	rogdi homolog (Drosophila)	ROGDI	2744
BI888475	1.16137	0.171796	0.977522	0.120779	0.696274	0.066689	0.0746	ENSDART00000147062	ENSDARG00000074346	16:28774794-28778926	-1	Dr.79759	BI888475
BI888915	0.99415	0.0438461	1.048	0.122673	1.31998	0.115142	0.0746	ENSDART00000149744	ENSDARG00000045401	24:17694937-17765417	1	Dr.37146	AL924675	ZDB-GENE-041114-176	mllt10	myeloid/lymphoid or mixed-lineage leukemia (trithorax homolog, Drosophila); translocated to, 10	myeloid/lymphoid or mixed-lineage leukemia (trithorax homolog, Drosophila); translocated to, 10	MLLT10	23309
BI889693	1.03988	0.0760651	0.899771	0.125119	0.667257	0.0455258	0.0746	ENSDART00000105176	ENSDARG00000010113	12:49763060-49770336	-1	Dr.155493	DN893323	ZDB-GENE-040426-1858	ndufb8	NADH dehydrogenase (ubiquinone) 1 beta subcomplex, 8	NADH dehydrogenase (ubiquinone) 1 beta subcomplex, 8	NDUFB8
BI890094	1.04519	0.0752063	1.10631	0.0985402	1.53543	0.159386	0.0746	ENSDART00000122175	ENSDARG00000011247	24:29859041-29889511	1	Dr.79649	AW566862	ZDB-GENE-060312-35	rnpc3	RNA-binding region (RNP1, RRM) containing 3	RNA-binding region (RNP1, RRM) containing 3	RNPC3	1406
BI896312	1.01294	0.129213	0.743593	0.119612	0.527233	0.0893122	0.0746	ENSDART00000041354	ENSDARG00000054632	18:47010047-47051478	1	Dr.78408	AI629075	ZDB-GENE-980526-426	fli1a	friend leukemia integration 1a	Friend leukemia virus integration 1	FLI1
BI980194	0.930849	0.21353	1.94274	0.405632	1.96731	0.285814	0.0746					Dr.151585	EH515900
BI982955	1.0157	0.0864885	0.753575	0.0798299	0.428174	0.11954	0.0746					Dr.140857	BM024110
BI983233	1.00092	0.0847241	1.01058	0.151263	0.643899	0.0865457	0.0746	ENSDART00000100254	ENSDARG00000069090	7:36541049-36549613	1	Dr.77332	BI884139	ZDB-GENE-030131-1531	atp6v0d1	ATPase, H+ transporting, V0 subunit D isoform 1	ATPase, H transporting, lysosomal 38kDa, V0 subunit d isoform 1	ATP6V0D1
BI983483	0.960177	0.029015	0.876483	0.0448819	0.782796	0.0395338	0.0746	ENSDART00000019063	ENSDARG00000012591	2:36442190-36452796	1	Dr.16820	EB918539	ZDB-GENE-040426-2607	pdcd10b	programmed cell death 10b	programmed cell death 10	PDCD10	7018
BM005167	1.0055	0.0631583	1.32991	0.0855855	1.52403	0.176502	0.0746												1982
BM023805	1.09327	0.13178	1.15564	0.203447	1.72468	0.171088	0.0746	ENSDART00000102455	ENSDARG00000013787	1:24641201-24656451	1	Dr.150952	BM023805
BM036321	0.978355	0.0686995	1.60556	0.219869	1.51878	0.207507	0.0746
BM072375	1.08618	0.124095	0.966379	0.22101	0.727318	0.0652083	0.0746	ENSDART00000102378	ENSDARG00000028252	14:53132822-53147633	1	Dr.123679	BI980776
BM095862	0.957033	0.0953682	0.84819	0.106235	0.667307	0.0543798	0.0746	ENSDART00000011362	ENSDARG00000020761	11:13713955-13719300	1	Dr.26118	AI545544	ZDB-GENE-030131-7146	arrdc2	arrestin domain containing 2	arrestin domain containing 2	ARRDC2	9646
BM096040	0.971117	0.0747595	1.07763	0.109278	0.673409	0.0505521	0.0746	ENSDART00000002401	ENSDARG00000007764	4:14057181-14069285	-1	Dr.78071	BG303766	ZDB-GENE-040426-776	klhdc10	kelch domain containing 10	kelch domain containing 10	KLHDC10
BM102070	0.96411	0.0841507	0.732719	0.103645	1.43254	0.146326	0.0746	ENSDART00000028115	ENSDARG00000029157	20:2528277-2612754	-1	Dr.34224	BI982769	ZDB-GENE-040724-82	med23	mediator complex subunit 23	mediator complex subunit 23	MED23
BM154197	1.03375	0.0725619	0.914585	0.62408	0.66605	0.0814533	0.0746	ENSDART00000140896	ENSDARG00000077058	22:7779988-7792168	1	Dr.85080	EH520771	ZDB-GENE-040801-186	zgc:92511
BM155325	1.05723	0.114054	0.893944	0.142667	0.565578	0.0639233	0.0746	ENSDART00000110202	ENSDARG00000079713	10:2696069-2698291	1	Dr.112968	NM_001128268						1108
BM181830	0.95701	0.176364	1.14786	0.154842	1.7511	0.197932	0.0746					Dr.76618	AI397236	ZDB-GENE-030131-218	wu:fb17e10
BM183855	1.08245	0.118768	0.875978	0.10214	0.550009	0.0725043	0.0746	ENSDART00000045607	ENSDARG00000005446	25:5016485-5038286	1	Dr.75286	CD585935	ZDB-GENE-051120-174	ckap5	cytoskeleton associated protein 5	cytoskeleton associated protein 5	CKAP5
M27153	1.03668	0.0824288	0.953169	0.0543188	0.752965	0.0523356	0.0746
NM_173263	1.0132	0.0481697	0.836468	0.0834078	0.765349	0.0635139	0.0746	ENSDART00000078522	ENSDARG00000056119	14:27728789-27738387	1	Dr.75657	EB978564	ZDB-GENE-020423-3	eef1g	eukaryotic translation elongation factor 1 gamma	eukaryotic translation elongation factor 1 gamma	EEF1G
U49406	0.958993	0.125375	0.463677	0.0663258	0.451167	0.104536	0.0746	ENSDART00000031761	ENSDARG00000025420	9:29266078-29268000	1	Dr.81286	AF117387	ZDB-GENE-990415-218	fzd5	frizzled homolog 5	frizzled homolog 5 (Drosophila)	FZD5	124056
U93474	0.997836	0.0445292	0.766118	0.0974886	0.739041	0.0597092	0.0746
U93476	1.11725	0.171805	0.702073	0.0612381	0.63043	0.0525941	0.0746	ENSDART00000123458	ENSDARG00000044525	22:986748-1002624	1
AI884227	1.12847	0.259535	0.794451	0.241724	0.572418	0.0615593	0.0754	ENSDART00000102260	ENSDARG00000058366	4:11098397-11104869	-1	Dr.144132	EB763692	ZDB-GENE-030131-3658	si:dkey-222f8.3				29801
BM184694	1.1693	0.13801	1.18066	0.148036	1.88166	0.250609	0.0754	ENSDART00000050296	ENSDARG00000033175	11:38886328-38891977	1	Dr.117027	BI980245	ZDB-GENE-040426-1112	snrpe	small nuclear ribonucleoprotein polypeptide E	small nuclear ribonucleoprotein polypeptide E	SNRPE	813
AI793355	0.88429	0.0959224	0.925375	0.0418534	1.27757	0.101298	0.076
AA658759	1.02051	0.0488314	1.06656	0.117867	0.858635	0.0355818	0.0768	ENSDART00000005944	ENSDARG00000020197	2:10478581-10494926	-1	Dr.76005	CK739296	ZDB-GENE-030131-5161	rpl5a	ribosomal protein L5a	ribosomal protein L5	RPL5
AI957445	0.941293	0.0764496	0.66894	0.115982	0.63327	0.0770446	0.0769					Dr.132592	AI957445	ZDB-GENE-030131-4378	wu:fc96a01				8192
BG305274	0.884928	0.130154	1.39248	0.116126	1.65218	0.315591	0.0769	ENSDART00000123271	ENSDARG00000041157	1:2692808-2706447	1	Dr.31451	BI473112	ZDB-GENE-030131-8292	rcan1	regulator of calcineurin 1	regulator of calcineurin 1	RCAN1	407
BI979131	0.960859	0.0986101	2.54362	0.57118	2.33296	0.778775	0.0769	ENSDART00000121613	ENSDARG00000087869	3:26851546-26859986	1	Dr.104288	EH514106	ZDB-GENE-070912-22	si:ch211-11k18.4				23524
BI705669	1.00108	0.0740393	1.19439	0.322417	0.736313	0.0642978	0.0776	ENSDART00000130087	ENSDARG00000013721	12:6725115-6731775	1	Dr.155165	EE704596						55904
AA494944	1.18386	0.178097	0.486872	0.115186	0.591967	0.134652	0.0787	ENSDART00000146407	ENSDARG00000092780	2:9535344-9536944	-1	Dr.448	AA494944	ZDB-GENE-030131-7012	si:ch1073-170o4.1				54997
AI641757	0.994624	0.0574145	0.883856	0.0628417	0.689817	0.0823604	0.0787					Dr.15418	CD606161	ZDB-GENE-030131-3003	hnf1bb	HNF1 homeobox Bb	HNF1 homeobox B	HNF1B	10664
AW466488	1.03625	0.0508362	1.23586	0.140829	1.35996	0.116855	0.0787	ENSDART00000137725	ENSDARG00000028971	20:50374145-50398350	1	Dr.121547	NM_001002384	ZDB-GENE-040718-79	cpsf2	cleavage and polyadenylation specific factor 2	cleavage and polyadenylation specific factor 2	CPSF2	6631
BI878723	0.993762	0.0640289	0.87388	0.204781	1.41801	0.160291	0.0787	ENSDART00000005405	ENSDARG00000005115	18:6101220-6117380	-1	Dr.1956	AI461350	ZDB-GENE-040426-1251	calub	calumenin b	calumenin	CALU	79641
BI883421	0.997591	0.0765052	1.26452	0.134542	1.41674	0.151596	0.0794	ENSDART00000124429	ENSDARG00000056621	18:22068912-22073311	1	Dr.53867	CK679921	ZDB-GENE-040624-5	ctcf	CCCTC-binding factor (zinc finger protein)	CCCTC-binding factor (zinc finger protein)	CTCF
BI841076	1.0472	0.140414	1.77133	0.727374	0.577829	0.109472	0.0801	ENSDART00000021317	ENSDARG00000009170	7:67288488-67326081	1	Dr.79011	BI534102	ZDB-GENE-030131-3782	ctr9	Ctr9, Paf1/RNA polymerase II complex component, homolog (S. cerevisiae)	Ctr9, Paf1/RNA polymerase II complex component, homolog (S. cerevisiae)	CTR9	8028
AF025305	0.977165	0.0190836	0.980867	0.0205998	1.02279	0.019343	0.0816	ENSDART00000141737	ENSDARG00000037870	3:40520889-40524586	-1	Dr.152450	EB991342	ZDB-GENE-000329-3	actb2	actin, beta 2	actin, beta	ACTB	54187
AW076585	1.04163	0.117546	1.74573	0.364496	0.545024	0.123679	0.0831	ENSDART00000056561	ENSDARG00000038729	21:7136709-7156370	-1	Dr.80190	AL911903	ZDB-GENE-050522-69	s100z	S100 calcium binding protein Z	S100 calcium binding protein Z	S100Z	4714
BI981105	0.961623	0.136614	0.611058	0.10098	0.58006	0.0817833	0.0863	ENSDART00000040240	ENSDARG00000032353	10:95633-102228	1	Dr.24546	BI981105	ZDB-GENE-040426-1611	tiprl				55599
AW342762	1.04302	0.0825264	0.660861	0.150713	0.752911	0.0744454	0.0886					Dr.26668	AW342762	ZDB-GENE-030131-6419	wu:fi86h10				339761
BI889549	0.975192	0.13917	1.09575	0.0714119	1.59543	0.214437	0.0886	ENSDART00000067086	ENSDARG00000045620	1:11631992-11640923	1	Dr.77320	CB365375	ZDB-GENE-030131-1500	nans	N-acetylneuraminic acid synthase	N-acetylneuraminic acid synthase	NANS	2313
AI641380	0.904392	0.130537	0.986297	0.11256	0.428013	0.116585	0.0892	ENSDART00000111509	ENSDARG00000079483	10:45681270-45711521	-1								2109
AF071266	0.959818	0.178673	1.099	0.225636	0.544284	0.0725281	0.0893	ENSDART00000067698	ENSDARG00000046045	11:2148535-2150246	-1	Dr.5729	Y14537	ZDB-GENE-000822-1	hoxc6b	homeo box C6b	homeo box C6	HOXC6
AW420785	0.916269	0.0803612	0.702804	0.0437917	0.598595	0.0842577	0.0893	ENSDART00000123191	ENSDARG00000063285	23:5244701-5248066	1	Dr.81555	AW420785	ZDB-GENE-061013-547	ube2t	ubiquitin-conjugating enzyme E2T (putative)	ubiquitin-conjugating enzyme E2T (putative)	UBE2T
BI890262	1.0459	0.0890422	0.907355	0.0750549	1.44987	0.139117	0.0893	ENSDART00000081309	ENSDARG00000092660	6:8144803-8158548	1	Dr.11380	BG308901	ZDB-GENE-080204-68	cyp27c1	cytochrome P450, family 27, subfamily C, polypeptide 1	cytochrome P450, family 27, subfamily C, polypeptide 1	CYP27C1
BI843305	1.01644	0.0629105	0.979057	0.0675079	1.31143	0.101871	0.0898					Dr.82088	AL908817	ZDB-GENE-060825-41	zgc:153713
AI964241	0.989646	0.0919235	1.22356	0.224903	0.713971	0.0644554	0.0911	ENSDART00000131019	ENSDARG00000016687	7:21456063-21491112	1	Dr.3523	BM280072	ZDB-GENE-030131-899	acadvl	acyl-Coenzyme A dehydrogenase, very long chain	acyl-Coenzyme A dehydrogenase, very long chain	ACADVL	9114
BI473992	0.971055	0.0752409	0.710938	0.086485	0.733282	0.0581754	0.0911	ENSDART00000131163	ENSDARG00000089282	11:38410181-38437594	-1	Dr.77958	AI601518						11235
AI545947	0.870375	0.0874829	1.39553	0.163756	1.3248	0.178464	0.0914	ENSDART00000008035	ENSDARG00000010445	18:14471615-14487550	-1	Dr.77456	AW115879	ZDB-GENE-030131-1301	trabd	TraB domain containing	TraB domain containing	TRABD
AI964318	0.997874	0.0996906	1.09053	0.157435	0.712957	0.0634617	0.0914	ENSDART00000078266	ENSDARG00000055868	12:20480934-20490249	1	Dr.105686	BG883551
BM095435	1.09552	0.103567	1.05993	0.140653	1.61764	0.199201	0.0914	ENSDART00000020505	ENSDARG00000015471	6:36792721-36826108	1	Dr.84280	BM095435	ZDB-GENE-040426-892	chd1l
BI897414	0.946909	0.0977856	0.955495	0.131042	0.690323	0.0475768	0.0916	ENSDART00000010081	ENSDARG00000009250	16:53740847-53755293	-1	Dr.76250	CK695787	ZDB-GENE-040426-1931	etfb	electron-transfer-flavoprotein, beta polypeptide	electron-transfer-flavoprotein, beta polypeptide	ETFB
BI670964	0.895472	0.126033	0.993279	0.0694814	1.33373	0.0792934	0.0918	ENSDART00000037879	ENSDARG00000011989	5:38532881-38536606	1	Dr.14325	BI670964	ZDB-GENE-010403-1	crx	cone-rod homeobox	cone-rod homeobox	CRX
AW077600	0.894583	0.11647	1.67497	0.257391	1.56154	0.294457	0.0923	ENSDART00000101978	ENSDARG00000069841	19:50016431-50019698	1	Dr.6064	CD605698	ZDB-GENE-030131-9315	wu:fj65c01				27106
BI671147	1.03192	0.102885	1.13944	0.0819841	0.645457	0.103267	0.0923												23008
AW777460	0.964957	0.0452065	0.866216	0.093427	1.17984	0.0760466	0.0945					Dr.75351	BI883321						9439
X97332	0.991829	0.130355	0.909213	0.174252	1.80457	0.382063	0.0945	ENSDART00000104206	ENSDARG00000056729	23:21763345-21765164	-1	Dr.121752	EB859616	ZDB-GENE-081030-7	her4.3
BF717510	1.00298	0.044033	0.930034	0.0803879	1.25705	0.096661	0.0959	ENSDART00000020122	ENSDARG00000005560	10:16980964-16985015	1	Dr.126590	DN903482
BI563129	0.997275	0.121615	1.0658	0.182007	1.39819	0.057564	0.0959					Dr.80983	EX157285
BI473490	1.07979	0.0839521	1.12393	0.1006	0.847383	0.0496051	0.0962	ENSDART00000139048	ENSDARG00000040705	9:42386742-42424366	-1	Dr.107681	BG799594	ZDB-GENE-030616-550	glsb	glutaminase b	glutaminase	GLS	9793
BI867933	0.898207	0.101882	1.28124	0.139016	1.44446	0.231319	0.0962	ENSDART00000051575	ENSDARG00000035573	5:27844086-27847789	1	Dr.84471	BI866881	ZDB-GENE-040625-113	zgc:86811				6635
BI673663	0.965158	0.0759482	1.02834	0.0908212	0.745106	0.0524229	0.0984	ENSDART00000003435	ENSDARG00000009806	10:41257326-41269140	1	Dr.83514	BQ092466	ZDB-GENE-040426-1709	smfn
AI626465	1.05837	0.103306	1.05974	0.0589541	0.754645	0.075581	0.0986					Dr.27420	CT590491	ZDB-GENE-030131-2388	wu:fc06e12				1937
BG727510	1.01665	0.102411	1.47492	0.0759134	1.51859	0.200421	0.0986	ENSDART00000004217	ENSDARG00000035598	5:22102847-22203191	1	Dr.76386	EB968284	ZDB-GENE-030114-6	coro1ca	coronin, actin binding protein, 1Ca	coronin, actin binding protein, 1C	CORO1C	7855
BI325606	1.03274	0.0809524	0.781999	0.0609392	0.530617	0.141647	0.0986	ENSDART00000081960	ENSDARG00000058969	24:17966473-18375807	-1	Dr.16289	BI325606
BG891983	0.934393	0.101927	1.05891	0.0858857	0.670597	0.0552843	0.0995	ENSDART00000057377	ENSDARG00000039269	13:33248149-33257976	1	Dr.122118	EH510509
BI880731	0.942049	0.0893337	0.994585	0.0526751	1.27114	0.100461	0.0995	ENSDART00000130072	ENSDARG00000007523	4:21360143-21408343	-1	Dr.79417	EH469362	ZDB-GENE-030131-4120	mll5	myeloid/lymphoid or mixed-lineage leukemia 5 (trithorax homolog, Drosophila)	myeloid/lymphoid or mixed-lineage leukemia 5 (trithorax homolog, Drosophila)	MLL5

## Sheet: S2B_Gill_ContVsDef
Systematic ID	Control		Deficiency		Excess		t-test	ENSEMBL				NBCI		ZFIN			Human Orthologues
	Normalized	SE	Normalized	SE	Normalized	SE	p	Transcript	Gene	map	sense	Unigene	gb	ID	Symbol	Description	Description	Symbol	Entrez Gene ID
AI437062	1.02805	0.0657186	1.8325	0.151254	1.51512	0.152623	0.0377	ENSDART00000128250	ENSDARG00000023214	25:23583174-23612754	-1	Dr.121622	AI384213
BI672347	1.03684	0.0955549	2.02344	0.158692	0.948797	0.357143	0.0377	ENSDART00000063775	ENSDARG00000043442	11:31506364-31509702	-1	Dr.76364	EH444695	ZDB-GENE-061027-365	zgc:153665
AI545062	0.975338	0.0475626	1.37433	0.0744904	1.05915	0.0876821	0.0431	ENSDART00000114437	ENSDARG00000076383	16:19677195-19699399	1	Dr.75388	AA495367
AI793968	1.00626	0.0742386	0.653183	0.0256708	0.948916	0.129112	0.0431	ENSDART00000049437	ENSDARG00000019383	20:18464020-18607662	-1	Dr.124852	AW420750
AW018737	0.944792	0.0482177	0.715215	0.0321111	0.745677	0.0914145	0.0431	ENSDART00000122695	ENSDARG00000003208	13:8916113-8923777	1	Dr.132543	AI878447
AW116627	0.990599	0.0734016	1.55677	0.088554	1.27774	0.236702	0.0431	ENSDART00000014666	ENSDARG00000002792	5:32141266-32155663	-1	Dr.77264	BG727444	ZDB-GENE-021031-2	arcn1a	archain 1a	archain 1	ARCN1	372
AW280572	0.981003	0.0481802	1.28351	0.0549362	1.20318	0.0966318	0.0431	ENSDART00000046122	ENSDARG00000044902	11:23860664-24015349	-1	Dr.159688	BI883838
BG304253	0.964431	0.0776436	1.42986	0.0560694	1.23671	0.317064	0.0431
BG308730	1.01819	0.069026	0.575653	0.0596327	1.06777	0.175194	0.0431					Dr.122675	BG308730
BG308920	0.972012	0.0971879	1.87835	0.234324	1.27923	0.0913437	0.0431					Dr.29127	BG308920	ZDB-GENE-060512-59	pold3	polymerase (DNA-directed), delta 3, accessory subunit	polymerase (DNA-directed), delta 3, accessory subunit	POLD3	10714
BI670950	0.933342	0.0796881	1.53963	0.10087	0.981449	0.12371	0.0431	ENSDART00000025348	ENSDARG00000016360	24:21549815-21565207	-1	Dr.120536	BI670950
BI864051	0.969847	0.0712274	0.657318	0.0371209	0.599809	0.0928241	0.0431					Dr.13412	BI863880
BI877937	0.930356	0.0724881	1.39454	0.0676317	0.989039	0.111185	0.0431	ENSDART00000017785	ENSDARG00000003213	14:49053883-49090125	1	Dr.78308	EB881245	ZDB-GENE-030131-2392	naa15a	N(alpha)-acetyltransferase 15, NatA auxiliary subunit a	N(alpha)-acetyltransferase 15, NatA auxiliary subunit	NAA15	80155
BI879867	1.0591	0.0842573	0.673094	0.0491481	0.988071	0.182997	0.0431	ENSDART00000113930	ENSDARG00000078828	22:11645281-11647804	1	Dr.51620	AA497186	ZDB-GENE-040107-40	npb	neuropeptide B	preproneuropeptide B (Interim)	NPB	256933
BI889463	1.00862	0.09348	1.60451	0.0443187	0.993714	0.0963824	0.0431	ENSDART00000113926	ENSDARG00000087243	10:44106419-44116846	-1	Dr.150268	AI385013	ZDB-GENE-030131-2700	wu:fc16a12
BM023720	0.969801	0.0582573	1.38971	0.0869837	1.15486	0.156597	0.0431	ENSDART00000124118	ENSDARG00000036820	8:27146808-27179441	1	Dr.121970	BI886185
BM183249	0.977557	0.0744543	1.43929	0.0773706	1.21427	0.108765	0.0431	ENSDART00000083505	ENSDARG00000059791	2:51762047-51765500	1	Dr.114083	BI979118	ZDB-GENE-060503-233	dad1	defender against cell death 1	defender against cell death 1	DAD1	1603
AF067532	1.03279	0.0757102	0.674253	0.0609006	0.726973	0.190627	0.0471	ENSDART00000076992	ENSDARG00000028148	13:29994561-30027364	1	Dr.75076	AA495434	ZDB-GENE-990415-8	pax2a	paired box gene 2a	paired box gene 2	PAX2	5076
AF250368	1.03344	0.100926	0.6369	0.0576754	1.01611	0.112481	0.0471	ENSDART00000113389	ENSDARG00000003462	21:1970835-1996552	1	Dr.82519	GO936267	ZDB-GENE-000928-1	fech	ferrochelatase	ferrochelatase (protoporphyria)	FECH	2235
AF424543	0.961261	0.177017	0.462171	0.0534239	0.797014	0.213274	0.0471					Dr.88586	AF424543
AI353364	0.950831	0.0773675	1.39989	0.0872572	0.992589	0.138617	0.0471	ENSDART00000020824	ENSDARG00000010098	12:18020367-18031792	1	Dr.76490	AI477252	ZDB-GENE-070209-259	pank1b	pantothenate kinase 1b	pantothenate kinase 1	PANK1	53354
AI384371	0.999051	0.0555956	1.42959	0.100395	1.33787	0.0913887	0.0471					Dr.121633	AI384862	ZDB-GENE-030131-8406	wu:fb11c02
AI415831	0.990957	0.0766328	1.5342	0.140091	1.06251	0.16786	0.0471	ENSDART00000025691	ENSDARG00000008170	10:43723551-43737936	1	Dr.76820	AI415831	ZDB-GENE-040704-42	dbnla	drebrin-like a	drebrin-like	DBNL	28988
AI477212	0.960893	0.0686539	0.69571	0.0409255	0.805277	0.0971589	0.0471					Dr.104997	AI477212	ZDB-GENE-030616-513	rassf6
AI497271	0.931024	0.0933389	0.599456	0.0470881	0.660189	0.0972132	0.0471	ENSDART00000149010	ENSDARG00000095807	8:52647262-52652016	1	Dr.77131	EB797524	ZDB-GENE-030131-1259	hp	haptoglobin	haptoglobin	HP	3240
AI558322	0.947219	0.102961	1.48212	0.104842	1.08808	0.168064	0.0471	ENSDART00000025171	ENSDARG00000016447	8:23958060-23973195	1	Dr.127503	CT733438
AI658333	1.047	0.104046	1.66436	0.128231	1.06439	0.13397	0.0471	ENSDART00000039865	ENSDARG00000030139	15:20646077-20654272	-1	Dr.77224	EV561679	ZDB-GENE-040822-17	sdhdb	succinate dehydrogenase complex, subunit D, integral membrane protein b	succinate dehydrogenase complex, subunit D, integral membrane protein	SDHD	6392
AI722566	0.941468	0.0739161	1.41805	0.122987	1.18576	0.167632	0.0471	ENSDART00000062682	ENSDARG00000042717	8:29228567-29240284	-1	Dr.122220	AW154212
AI883827	1.03448	0.115284	1.67739	0.10608	1.19291	0.187725	0.0471					Dr.79378	BQ259915	ZDB-GENE-040108-9	sb:cb1058
AI957848	1.14055	0.151274	0.640055	0.063093	1.10985	0.316617	0.0471					Dr.104274	AI957848	ZDB-GENE-031118-4	wu:fd07a04
AI964296	1.00854	0.0567154	1.33704	0.0709743	0.917364	0.138179	0.0471	ENSDART00000032498	ENSDARG00000024540	8:30574662-30582993	1	Dr.77360	AI588501	ZDB-GENE-040718-248	zgc:100919
AW077984	0.922312	0.0831041	0.594717	0.0358508	0.955295	0.109879	0.0471					Dr.18486	EG571701	ZDB-GENE-050301-2	pkz
AW115602	0.999279	0.100602	1.53868	0.0968628	1.38471	0.260943	0.0471	ENSDART00000062671	ENSDARG00000042708	8:29198441-29202948	-1	Dr.75912	BQ259763	ZDB-GENE-030131-9167	tuba8l
AW116285	1.03606	0.0753155	1.51757	0.108783	1.34956	0.149383	0.0471	ENSDART00000064393	ENSDARG00000043857	10:26582376-26596488	1	Dr.12519	BI879771	ZDB-GENE-040426-2930	ufm1
AW116472	0.881901	0.0912782	1.40018	0.10746	1.28502	0.192069	0.0471	ENSDART00000140019	ENSDARG00000091699	13:43379101-43402897	-1	Dr.32637	AW777418	ZDB-GENE-050320-69	capn2a	calpain 2, (m/II) large subunit a	calpain 2, (m/II) large subunit	CAPN2	824
AW154483	1.05224	0.0741738	1.48535	0.0942075	1.05629	0.144039	0.0471	ENSDART00000018500	ENSDARG00000034293	20:20398988-20427737	-1	Dr.75612	AW420876	ZDB-GENE-040426-706	hif1ab	hypoxia-inducible factor 1, alpha subunit (basic helix-loop-helix transcription factor) b	hypoxia-inducible factor 1, alpha subunit (basic helix-loop-helix transcription factor)	HIF1A	3091
AW170898	1.0026	0.112375	1.88905	0.280785	1.92998	0.326572	0.0471	ENSDART00000024722	ENSDARG00000010571	24:17894626-17913559	1	Dr.76424	AW595546	ZDB-GENE-041111-259	ezh2	enhancer of zeste homolog 2 (Drosophila)	enhancer of zeste homolog 2 (Drosophila)	EZH2	2146
AW173877	1.03717	0.0557029	1.33673	0.0623633	1.09861	0.216542	0.0471	ENSDART00000014729	ENSDARG00000008383	3:40790893-40799236	1	Dr.3270	EB969964	ZDB-GENE-040116-1	arpc1a	actin related protein 2/3 complex, subunit 1A	actin related protein 2/3 complex, subunit 1A, 41kDa	ARPC1A	10552
AW232866	1.08542	0.0707453	0.768755	0.0562707	0.853018	0.206867	0.0471	ENSDART00000024084	ENSDARG00000020956	24:12824152-12843055	-1	Dr.132490	AW019440	ZDB-GENE-040426-2266	pck2	phosphoenolpyruvate carboxykinase 2 (mitochondrial)	phosphoenolpyruvate carboxykinase 2 (mitochondrial)	PCK2	5106
AW233515	0.957207	0.149589	1.89774	0.192231	1.01976	0.227394	0.0471					Dr.155627	AW279853
AW422248	1.01115	0.0953176	0.523445	0.0720876	1.06003	0.186573	0.0471	ENSDART00000112177	ENSDARG00000074915	1:52046090-52054756	1	Dr.81524	AL910770	ZDB-GENE-080204-12	etaa1	Ewing tumor-associated antigen 1	Ewing tumor-associated antigen 1	ETAA1	54465
BG302753	1.093	0.104231	0.663835	0.0703307	0.928146	0.0892392	0.0471	ENSDART00000142128	ENSDARG00000013079	12:9938229-9972460	1	Dr.77414	AI545473	ZDB-GENE-031118-150	tubgcp2	tubulin, gamma complex associated protein 2	tubulin, gamma complex associated protein 2	TUBGCP2	10844
BG303447	0.954806	0.0668533	1.46964	0.13021	0.998968	0.049635	0.0471	ENSDART00000085913	ENSDARG00000042091	22:20477396-20484989	-1	Dr.123811	BM774921
BG303448	0.940975	0.137212	0.464262	0.0728208	0.608174	0.152379	0.0471	ENSDART00000112655	ENSDARG00000061099	11:24732992-24764923	1	Dr.122597	BG303448	ZDB-GENE-080229-6	nfasca	neurofascin homolog (chicken) a	neurofascin homolog (chicken)	NFASC	23114
BI429994	0.92659	0.137218	0.389045	0.0813365	0.631242	0.18482	0.0471
BI563231	1.0375	0.0573599	1.37225	0.0634217	1.45828	0.209104	0.0471	ENSDART00000056286	ENSDARG00000038559	24:39080414-39081731	-1	Dr.124197	EB908688
BI672150	1.01116	0.0641842	1.34709	0.0724535	1.15705	0.116548	0.0471	ENSDART00000114304	ENSDARG00000040287	16:26920519-26935177	1	Dr.76857	EB798100	ZDB-GENE-030131-448	ywhabl
BI673652	1.02838	0.0998389	0.674177	0.0527385	1.0844	0.120314	0.0471
BI845251	0.953902	0.0925314	1.83521	0.261092	1.37695	0.333265	0.0471	ENSDART00000066198	ENSDARG00000045027	9:56684564-56702376	-1	Dr.14122	CB360735	ZDB-GENE-060825-293	rab9a	RAB9A, member RAS oncogene family	RAB9A, member RAS oncogene family	RAB9A	9367
BI877696	0.950715	0.118519	1.69429	0.18981	1.25979	0.246586	0.0471	ENSDART00000100692	ENSDARG00000069279	8:17277714-17289206	1	Dr.80704	EB770870	ZDB-GENE-030131-6149	elovl7a	ELOVL family member 7, elongation of long chain fatty acids (yeast) a	ELOVL family member 7, elongation of long chain fatty acids (yeast)	ELOVL7	79993
BI881145	1.01796	0.0687885	1.36274	0.0568911	0.979957	0.0824795	0.0471	ENSDART00000067478	ENSDARG00000051861	25:22886407-22910736	-1	Dr.93281	BE016254	ZDB-GENE-060512-114	pkp3	plakophilin 3	plakophilin 3	PKP3	11187
BI979131	0.960859	0.0986101	2.54362	0.57118	2.33296	0.778775	0.0471	ENSDART00000121613	ENSDARG00000087869	3:26851546-26859986	1	Dr.104288	EH514106	ZDB-GENE-070912-22	si:ch211-11k18.4
BM005021	0.954358	0.104314	1.50842	0.0971644	1.25113	0.243387	0.0471	ENSDART00000039760	ENSDARG00000030177	9:23004809-23009980	-1	Dr.47891	CV491344	ZDB-GENE-050522-158	uchl3	ubiquitin carboxyl-terminal esterase L3 (ubiquitin thiolesterase)	ubiquitin carboxyl-terminal esterase L3 (ubiquitin thiolesterase)	UCHL3	7347
BM101643	1.08844	0.143954	0.611262	0.0537975	1.0257	0.224489	0.0471	ENSDART00000112750	ENSDARG00000077461	12:45877488-45923665	1	Dr.150890	BI867639
BM185868	1.11933	0.151148	0.610424	0.0690076	0.813733	0.0814784	0.0471	ENSDART00000114712	ENSDARG00000078528	18:429053-451198	1	Dr.81059	BI980929
BM186095	1.00728	0.127425	1.66152	0.0864583	1.06585	0.219482	0.0471	ENSDART00000109434	ENSDARG00000077549	13:6974469-6990691	-1	Dr.104697	EB873971	ZDB-GENE-050506-76	aifm2	apoptosis-inducing factor, mitochondrion-associated, 2	apoptosis-inducing factor, mitochondrion-associated, 2	AIFM2	84883
U49406	0.958993	0.125375	0.463677	0.0663258	0.451167	0.104536	0.0471	ENSDART00000031761	ENSDARG00000025420	9:29266078-29268000	1	Dr.81286	AF117387	ZDB-GENE-990415-218	fzd5	frizzled homolog 5	frizzled homolog 5 (Drosophila)	FZD5	7855
X69088	0.937537	0.0681847	0.686438	0.037382	0.732361	0.130649	0.0471	ENSDART00000046633	ENSDARG00000044841	21:5057239-5083787	1	Dr.159022	BI888485					notch1
BG304697	0.909478	0.096983	0.562618	0.0551144	0.629667	0.139356	0.0497	ENSDART00000048210	ENSDARG00000039929	5:53450874-53462231	1	Dr.76092	EB960621	ZDB-GENE-040426-1654	ckmt2	creatine kinase, mitochondrial 2 (sarcomeric)	creatine kinase, mitochondrial 2 (sarcomeric)	CKMT2	1160
BI887176	1.04772	0.0528956	1.41427	0.100223	1.16056	0.0680294	0.0505	ENSDART00000149057	ENSDARG00000008680	19:49797067-49809511	-1	Dr.77142	EB935146	ZDB-GENE-030131-2579	kpnb1	karyopherin (importin) beta 1	karyopherin (importin) beta 1	KPNB1	3837
AB022162	1.0823	0.102195	0.727497	0.0502366	0.843671	0.116907	0.0513	ENSDART00000043117	ENSDARG00000033551	13:28736465-28785110	1	Dr.154503	EH471026
AI721501	1.1308	0.137682	1.81923	0.137783	1.37332	0.176385	0.0513	ENSDART00000032341	ENSDARG00000023989	19:38669388-38683108	1	Dr.78732	AW777427	ZDB-GENE-040801-259	pef1	penta-EF-hand domain containing 1	penta-EF-hand domain containing 1	PEF1	553115
AW279918	1.0314	0.0629091	0.749715	0.0523787	0.947466	0.117145	0.0513					Dr.107054	BI534147
BE693197	0.994803	0.0377381	1.29238	0.0834044	0.998936	0.0942367	0.0513	ENSDART00000034124	ENSDARG00000018602	19:21190757-21204665	1	Dr.123609	CT731140
BI889151	1.10358	0.105589	1.58793	0.0616835	1.18312	0.15826	0.0513	ENSDART00000034536	ENSDARG00000026712	3:17259487-17295765	1	Dr.152484	CN173627
BM104604	0.977591	0.0618229	1.2498	0.0364482	1.3417	0.210759	0.0513	ENSDART00000122361	ENSDARG00000087263	18:32890662-32897634	-1	Dr.297	BM529241	ZDB-GENE-030131-9134	ssr3	signal sequence receptor, gamma	signal sequence receptor, gamma (translocon-associated protein gamma)	SSR3	6747
AW116649	1.18383	0.158346	0.683966	0.0656718	1.07626	0.232944	0.0516	ENSDART00000023814	ENSDARG00000004470	3:46802135-46833402	1	Dr.76218	BI708195	ZDB-GENE-040426-770	prkcsh
AA494944	1.18386	0.178097	0.486872	0.115186	0.591967	0.134652	0.0518	ENSDART00000146407	ENSDARG00000092780	2:9535344-9536944	-1	Dr.448	AA494944	ZDB-GENE-030131-7012	si:ch1073-170o4.1
AF108820	0.99002	0.0993539	0.655267	0.0514935	0.88893	0.107424	0.0518	ENSDART00000126421	ENSDARG00000068407	18:35577685-35580916	-1	Dr.155298	NM_001130608	ZDB-GENE-990621-11	six9
AF424546	0.995131	0.100277	0.68209	0.0305524	1.03367	0.125118	0.0518					Dr.30483	AF424546
BG303237	1.03934	0.120552	0.67348	0.0391724	0.934499	0.173159	0.0518
BI843153	0.973176	0.0919977	1.48408	0.134241	1.30434	0.117512	0.0518	ENSDART00000010944	ENSDARG00000003573	3:35636166-35640105	-1	Dr.75282	AL923549	ZDB-GENE-040718-201	dctn5	dynactin 5	dynactin 5 (p25)	DCTN5	84516
BM182738	1.04902	0.0464267	1.24381	0.0311291	1.09645	0.113474	0.0518	ENSDART00000139410	ENSDARG00000027357	3:32969514-32974603	1	Dr.14117	AI330662	ZDB-GENE-040426-925	cd2bp2	CD2 antigen (cytoplasmic tail) binding protein 2	CD2 antigen (cytoplasmic tail) binding protein 2	CD2BP2	10421
NP12ESTG00000016695	1.01628	0.0579938	1.68076	0.219593	1.26984	0.177124	0.0518
AI964225	1.05874	0.0708533	0.755196	0.0608264	0.846389	0.0915751	0.0525	ENSDART00000144007	ENSDARG00000008109	2:52389295-52418373	-1	Dr.114076	EB840354	ZDB-GENE-040426-2740	eef1da	elongation factor-1, delta, a	elongation factor-1, delta	EEF1D	1936
BF157279	1.05798	0.0962577	0.719204	0.0581488	0.852487	0.114845	0.0525	ENSDART00000126239	ENSDARG00000087238	24:21501234-21516701	-1	Dr.24752	BF156056	ZDB-GENE-030131-3116	wu:fc27f04
BI841891	0.916657	0.114209	1.56138	0.179384	1.0837	0.23951	0.0525					Dr.132299	EH529296	ZDB-GENE-030131-9563	ces3	carboxylesterase 3	carboxylesterase 3	CES3	23491
AI667527	0.969813	0.205827	0.463827	0.0467773	0.689881	0.176156	0.0527	ENSDART00000091169	ENSDARG00000062795	14:11180332-11268778	1	Dr.5169	BM037636	ZDB-GENE-050517-10	abcb7
AW077600	0.894583	0.11647	1.67497	0.257391	1.56154	0.294457	0.0527	ENSDART00000101978	ENSDARG00000069841	19:50016431-50019698	1	Dr.6064	CD605698	ZDB-GENE-030131-9315	wu:fj65c01
BG727510	1.01665	0.102411	1.47492	0.0759134	1.51859	0.200421	0.0527	ENSDART00000004217	ENSDARG00000035598	5:22102847-22203191	1	Dr.76386	EB968284	ZDB-GENE-030114-6	coro1ca	coronin, actin binding protein, 1Ca	coronin, actin binding protein, 1C	CORO1C	23603
AF260240	1.119	0.112162	1.63421	0.102761	1.22952	0.237724	0.053	ENSDART00000006173	ENSDARG00000014047	10:22344978-22350629	-1	Dr.75457	AF260240	ZDB-GENE-001103-5	cldn7b	claudin 7b	claudin 7	CLDN7	1366
ENSDART00000013743	1.05415	0.143482	1.73196	0.128993	1.11991	0.277053	0.053	ENSDART00000013743	ENSDARG00000015126	6:3678916-3689991	1	Dr.75691	AA566682	ZDB-GENE-040426-1659	gorasp2
AB030897	1.03472	0.0984158	0.721364	0.0341461	0.894204	0.110635	0.0531	ENSDART00000040362	ENSDARG00000000857	8:24680514-24713662	1	Dr.72252	EV560985	ZDB-GENE-010202-2	mapk14a	mitogen-activated protein kinase 14a	mitogen-activated protein kinase 14	MAPK14	1432
BG892015	1.14241	0.14781	1.8386	0.14007	1.35263	0.156927	0.0531					Dr.43999	BG892015	ZDB-GENE-071009-2	cgnl1	cingulin-like 1	cingulin-like 1	CGNL1	84952
BM026002	0.999742	0.117414	1.78278	0.246359	1.04072	0.31756	0.0531	ENSDART00000057257	ENSDARG00000039490	15:27759593-27773895	1	Dr.12713	BI882182	ZDB-GENE-040426-744	pitpnaa	phosphatidylinositol transfer protein, alpha a	phosphatidylinositol transfer protein, alpha	PITPNA	5306
BG799445	0.997475	0.148887	0.52429	0.0789896	1.1227	0.251106	0.0533	ENSDART00000074984	ENSDARG00000053022	10:6162239-6163204	1
AB030901	1.05234	0.0531101	0.824989	0.0523386	0.663263	0.0878747	0.0534	ENSDART00000058834	ENSDARG00000063583	3:11498024-11522873	-1	Dr.82506	CO354494	ZDB-GENE-060512-98	map2k4a	mitogen-activated protein kinase kinase 4a	mitogen-activated protein kinase kinase 4	MAP2K4	6416
AF133306	1.01998	0.222222	0.472616	0.0648211	0.678021	0.0984879	0.0534	ENSDART00000025575	ENSDARG00000011703	20:22202472-22246469	1	Dr.81289	NM_130957	ZDB-GENE-990630-14	clock	clock	circadian locomoter output cycles kaput	CLOCK	9575
AF361751	1.03448	0.0753893	0.59153	0.0949671	0.838315	0.126677	0.0534	ENSDART00000147856	ENSDARG00000052765	14:37030364-37032576	1	Dr.81161	BM035121	ZDB-GENE-020125-4	gria2b	glutamate receptor, ionotropic, AMPA 2b	glutamate receptor, ionotropic, AMPA 2	GRIA2	2891
AI331251	0.901757	0.113832	0.472381	0.0865014	1.04649	0.129813	0.0534
AI353694	1.01116	0.179623	1.94678	0.294163	0.61487	0.216997	0.0534	ENSDART00000147769	ENSDARG00000091996	5:32253549-32254918	-1	Dr.76461	AI616557	ZDB-GENE-030131-12	si:ch211-117m20.5
AI497414	0.910523	0.0618535	0.649561	0.0576421	0.756734	0.041228	0.0534	ENSDART00000074973	ENSDARG00000053021	5:44562559-44569382	-1	Dr.77217	AI497414	ZDB-GENE-060825-196	grsf1	G-rich RNA sequence binding factor 1	G-rich RNA sequence binding factor 1	GRSF1	2926
AI545947	0.870375	0.0874829	1.39553	0.163756	1.3248	0.178464	0.0534	ENSDART00000008035	ENSDARG00000010445	18:14471615-14487550	-1	Dr.77456	AW115879	ZDB-GENE-030131-1301	trabd	TraB domain containing	TraB domain containing	TRABD	80305
AI721658	0.949469	0.0479336	1.16355	0.054408	1.00725	0.118512	0.0534	ENSDART00000067776	ENSDARG00000046106	20:47726812-47763529	-1	Dr.33795	EB963378	ZDB-GENE-040718-304	rab10	RAB10, member RAS oncogene family	RAB10, member RAS oncogene family	RAB10	10890
AI722295	0.98736	0.0827261	0.711175	0.0465714	0.869592	0.177326	0.0534
AI793700	1.01853	0.348222	0.385537	0.0458474	0.36269	0.0682061	0.0534					Dr.78989	EE206236	ZDB-GENE-030131-3751	wu:fc51h02
AI793820	1.00211	0.136141	0.611707	0.0515632	0.659861	0.0889781	0.0534	ENSDART00000100341	ENSDARG00000069122	18:17414120-17434755	1	Dr.154744	FP217846
AI957847	0.952341	0.0642008	1.26007	0.0844378	1.1175	0.0951661	0.0534	ENSDART00000081016	ENSDARG00000058203	23:12952070-13009566	1	Dr.76942	BM026069	ZDB-GENE-040426-57	smc1al	structural maintenance of chromosomes 1A, like	structural maintenance of chromosomes 1A	SMC1A	8243
AI959704	1.06609	0.0597201	1.89082	0.308817	1.47598	0.135126	0.0534					Dr.75245	AI544991
AW171268	1.0868	0.0743768	1.51664	0.128679	1.36669	0.168522	0.0534	ENSDART00000126891	ENSDARG00000027590	2:22059945-22073010	1	Dr.113870	AW421103
AW174328	0.972757	0.126744	1.58086	0.161365	1.01298	0.308024	0.0534	ENSDART00000098558	ENSDARG00000061173	18:42949073-42981404	1	Dr.105850	EB868844	ZDB-GENE-030131-6496	st14a	suppression of tumorigenicity 14 (colon carcinoma) a	suppression of tumorigenicity 14 (colon carcinoma, matriptase, epithin)	ST14	6768
AW174685	0.977318	0.0439712	1.30565	0.104262	1.2654	0.0865253	0.0534	ENSDART00000129870	ENSDARG00000040184	20:2760607-2771761	1	Dr.75407	AL906176	ZDB-GENE-030131-4862	syncrip	synaptotagmin binding, cytoplasmic RNA interacting protein	synaptotagmin binding, cytoplasmic RNA interacting protein	SYNCRIP	10492
AW203093	1.01109	0.0944679	1.55719	0.166601	1.3844	0.32596	0.0534	ENSDART00000079448	ENSDARG00000056875	22:23560000-23562207	1	Dr.39062	BE017706	ZDB-GENE-040718-410	rgs2	regulator of G-protein signaling 2	regulator of G-protein signaling 2, 24kDa	RGS2	5997
AW280049	1.16713	0.131467	0.778357	0.0643177	0.883578	0.114653	0.0534	ENSDART00000073651	ENSDARG00000051936	25:21362967-21373778	1	Dr.12056	BQ077032	ZDB-GENE-040426-1331	ergic2	ERGIC and golgi 2	ERGIC and golgi 2	ERGIC2	51290
BE016208	1.06299	0.130823	0.690129	0.0517984	1.15886	0.111355	0.0534	ENSDART00000147056	ENSDARG00000011076	19:5614523-5623435	1	Dr.82020	BE016215	ZDB-GENE-040704-1	zgc:91968
BE017901	0.974701	0.0835227	1.3569	0.0869452	1.36635	0.187354	0.0534	ENSDART00000088208	ENSDARG00000029146	23:25739995-25974293	-1	Dr.155710	BE017901	ZDB-GENE-030131-7126	si:ch73-60e21.3
BF718212	0.961732	0.0867646	0.700478	0.0210126	0.738465	0.0987163	0.0534	ENSDART00000136175	ENSDARG00000043010	7:59081792-59121652	1	Dr.78101	BG737529	ZDB-GENE-040801-121	camk2d1	calcium/calmodulin-dependent protein kinase (CaM kinase) II delta 1	CAMK2D calcium/calmodulin-dependent protein kinase (CaM kinase) II delta	CAMK2D	817
BG303312	0.946059	0.0782765	0.663241	0.0547177	0.642224	0.0668075	0.0534	ENSDART00000021814	ENSDARG00000013489	15:6532407-6546523	-1	Dr.94421	BI709416	ZDB-GENE-051120-21	zgc:123178
BG303480	1.05573	0.108061	1.63692	0.180665	1.10232	0.13687	0.0534	ENSDART00000052080	ENSDARG00000035870	19:34240041-34264222	-1	Dr.79940	EE204455	ZDB-GENE-030616-616	laptm4b	lysosomal associated protein transmembrane 4 beta	lysosomal protein transmembrane 4 beta	LAPTM4B	55353
BG306175	1.00242	0.0713008	0.678308	0.0686756	0.794073	0.12746	0.0534
BG306422	1.01776	0.0506719	1.30012	0.0848312	0.937673	0.0568732	0.0534					Dr.79819	BM735962	ZDB-GENE-030131-10099	ik:tdsubc_1g11
BG985703	0.956016	0.108031	1.43603	0.114439	1.25531	0.295347	0.0534	ENSDART00000127938	ENSDARG00000056160	9:33320422-33333919	-1	Dr.75320	AI522463	ZDB-GENE-021206-1	hspd1	heat shock 60kD protein 1 (chaperonin)	heat shock 60kDa protein 1 (chaperonin)	HSPD1	3329
BI325778	0.972003	0.0859948	1.41544	0.125536	1.02426	0.112541	0.0534	ENSDART00000060694	ENSDARG00000041400	16:6973604-6977199	-1	Dr.81865	EB862877	ZDB-GENE-040801-18	zgc:100908
BI428149	0.979963	0.0787057	0.613799	0.0824509	0.594269	0.164148	0.0534	ENSDART00000127467	ENSDARG00000013317	7:23991139-24019264	1	Dr.76123	BI428149	ZDB-GENE-040426-1206	pygmb	phosphorylase, glycogen (muscle) b	phosphorylase, glycogen; muscle (McArdle syndrome, glycogen storage disease type V)	PYGM	5837
BI671284	1.0121	0.128774	1.83241	0.28245	1.09	0.199769	0.0534	ENSDART00000063135	ENSDARG00000043003	22:11706582-11725123	-1	Dr.130719	EE208417
BI672169	0.98376	0.0485426	0.69602	0.0667023	0.856121	0.0823716	0.0534	ENSDART00000089589	ENSDARG00000062442	12:19559160-19569440	1	Dr.103463	BI672169
BI672775	1.00711	0.0803784	1.55321	0.1807	1.31605	0.194509	0.0534	ENSDART00000113271	ENSDARG00000079701	Zv9_scaffold3489:65006-100755	1	Dr.159826	BI673541
BI673416	1.00477	0.0623369	1.24671	0.0396575	1.37838	0.187049	0.0534	ENSDART00000102500	ENSDARG00000023330	1:25626437-25630757	-1	Dr.75606	AA606174	ZDB-GENE-030131-719	anp32b	acidic (leucine-rich) nuclear phosphoprotein 32 family, member B	acidic (leucine-rich) nuclear phosphoprotein 32 family, member B	ANP32B	10541
BI707054	1.10316	0.171705	0.648653	0.0384004	0.662709	0.0601332	0.0534					Dr.115454	BM081462
BI709813	1.03237	0.0734915	1.31856	0.047853	1.00353	0.102726	0.0534	ENSDART00000143438	ENSDARG00000094407	19:28075000-28091405	-1	Dr.86007	EX156247	ZDB-GENE-060503-559	si:dkeyp-46h3.1
BI841644	0.962551	0.0691113	1.2661	0.0726737	1.2242	0.258578	0.0534					Dr.132682	AW117085	ZDB-GENE-030131-5034	wu:fe26c10
BI866290	1.03083	0.0603444	1.28936	0.0637296	1.14623	0.120613	0.0534					Dr.70839	CT732073	ZDB-GENE-050506-101	paf1	paf1, RNA polymerase II associated factor, homolog (S. cerevisiae)	Paf1, RNA polymerase II associated factor, homolog (S. cerevisiae)	PAF1	54623
BI867171	1.04542	0.0867661	1.47975	0.111849	1.11223	0.136804	0.0534	ENSDART00000130955	ENSDARG00000044153	17:25477643-25490769	-1	Dr.29419	EE202725	ZDB-GENE-030616-609	ppp1cb	protein phosphatase 1, catalytic subunit, beta isoform	protein phosphatase 1, catalytic subunit, beta isoform	PPP1CB	5500
BI877859	0.933049	0.0860254	0.664863	0.0266468	0.814634	0.0694913	0.0534	ENSDART00000129729	ENSDARG00000074297	13:41038672-41058222	1	Dr.159586	CV481913	ZDB-GENE-040426-2125	slc25a28	solute carrier family 25, member 28	solute carrier family 25, member 28	SLC25A28	81894
BI887399	1.08556	0.0902598	1.58212	0.150525	1.00356	0.0963698	0.0534					Dr.21850	AI884101	ZDB-GENE-040426-688	uso1	USO1 homolog, vesicle docking protein (yeast)	USO1 homolog, vesicle docking protein (yeast)	USO1	8615
BM005167	1.0055	0.0631583	1.32991	0.0855855	1.52403	0.176502	0.0534
BM036321	0.978355	0.0686995	1.60556	0.219869	1.51878	0.207507	0.0534
BM182177	0.943242	0.0608356	1.2024	0.0595086	0.900171	0.0759341	0.0534	ENSDART00000048256	ENSDARG00000029241	12:5744606-5755325	-1	Dr.20507	BQ616474	ZDB-GENE-050522-222	cep55l
BM182396	0.940213	0.0602698	0.706064	0.0497573	0.88427	0.0851142	0.0534	ENSDART00000019786	ENSDARG00000019000	22:32548210-32596439	-1	Dr.24937	EB914367	ZDB-GENE-030131-3196	smc3	structural maintenance of chromosomes 3	structural maintenance of chromosomes 3	SMC3	9126
BM185191	1.06538	0.110405	1.6202	0.144682	1.02994	0.101385	0.0534	ENSDART00000130396	ENSDARG00000086627	25:32469852-32475931	-1	Dr.106286	AI957690	ZDB-GENE-030131-4395	wu:fc97h11
U93458	0.928814	0.0996277	1.40643	0.129504	0.796272	0.15985	0.0534	ENSDART00000040769	ENSDARG00000033172	16:49358592-49391556	1	Dr.126903	CT608440
X76051	0.981418	0.0464411	0.682214	0.0716117	0.924659	0.137625	0.0534	ENSDART00000059753	ENSDARG00000040777	9:38019603-38027188	1	Dr.153172	EB904989	ZDB-GENE-990415-2	inhbb	inhibin, beta B	inhibin, beta B (activin AB beta polypeptide)	INHBB	3625
AI588172	0.972486	0.100959	1.80993	0.315319	1.05339	0.166117	0.0537					Dr.208	AI588172	ZDB-GENE-021115-1	slc11a2	solute carrier family 11 (proton-coupled divalent metal ion transporters), member 2	solute carrier family 11 (proton-coupled divalent metal ion transporters), member 2	SLC11A2	4891
AI793927	1.04903	0.080869	0.78806	0.0460433	1.01658	0.123714	0.0537					Dr.150447	AI793927	ZDB-GENE-030131-3857	wu:fc56c01
BI886794	1.13571	0.192983	0.662745	0.0290057	1.00944	0.15538	0.0537	ENSDART00000125555	ENSDARG00000042530	18:11684774-11719398	-1	Dr.31864	CK685208	ZDB-GENE-040715-8	nup205	nucleoporin 205	nucleoporin 205kDa	NUP205	23165
BM024326	1.02912	0.100488	1.5076	0.137309	1.31329	0.141139	0.0537	ENSDART00000041036	ENSDARG00000031302	13:28233331-28487458	-1	Dr.84560	BM071349	ZDB-GENE-060920-2	smap1	stromal membrane-associated protein 1	stromal membrane-associated protein 1	SMAP1	60682
AI877924	1.06284	0.0885271	1.41669	0.0734461	1.54512	0.207965	0.0539	ENSDART00000100848	ENSDARG00000028800	16:6868502-6899350	1	Dr.121944	CT696026
AB030902	1.01907	0.073577	1.3431	0.0893962	0.992403	0.118297	0.0543	ENSDART00000103746	ENSDARG00000070573	3:26812726-26823133	1	Dr.75913	AL906721	ZDB-GENE-040121-1	mapk3	mitogen-activated protein kinase 3	mitogen-activated protein kinase 3	MAPK3	5595
AF097479	1.00636	0.085342	0.700326	0.0717901	0.749641	0.133011	0.0543	ENSDART00000000670	ENSDARG00000000631	9:29975916-30036561	-1	Dr.96224	EB955857	ZDB-GENE-030616-449	ptpn4a	protein tyrosine phosphatase, non-receptor type 4, a	protein tyrosine phosphatase, non-receptor type 4 (megakaryocyte)	PTPN4	5775
AI584441	1.09522	0.128178	1.69649	0.175205	1.67825	0.362416	0.0543					Dr.77595	BM035555	ZDB-GENE-030131-7975	wu:fj44b09
AI641377	0.926402	0.0625234	1.39483	0.169521	1.1281	0.155632	0.0543					Dr.20193	AI641377	ZDB-GENE-040808-67	kras	v-Ki-ras2 Kirsten rat sarcoma viral oncogene homolog	v-Ki-ras2 Kirsten rat sarcoma viral oncogene homolog	KRAS	3845
AI723191	0.998073	0.0557868	1.25706	0.074034	1.17566	0.117077	0.0543	ENSDART00000019136	ENSDARG00000014159	19:34270844-34289691	-1	Dr.123007	BI884132
AJ001423	0.936986	0.0827518	0.45788	0.103722	0.5634	0.0894998	0.0543	ENSDART00000123700	ENSDARG00000024829	2:35230256-35287771	-1	Dr.104489	EB796230	ZDB-GENE-990415-262	tnw	tenascin W	tenascin N	TNN	63923
BG303848	1.00365	0.0474723	0.797038	0.0502586	0.86632	0.0712661	0.0543	ENSDART00000049240	ENSDARG00000032619	3:17914556-17918223	-1	Dr.124190	BQ480732
BG306190	0.998867	0.0749747	1.32972	0.0900044	1.47427	0.155484	0.0543	ENSDART00000114322	ENSDARG00000078125	16:15791468-15824231	1	Dr.82917	EE210111
BG985612	0.973405	0.0590473	0.783945	0.0363568	0.926756	0.100777	0.0543	ENSDART00000082422	ENSDARG00000059333	24:9308936-9397300	1	Dr.81501	BG985612	ZDB-GENE-000607-77	si:ch211-285f17.1
BI672337	1.05659	0.0967477	0.725074	0.0700853	0.829967	0.062393	0.0543	ENSDART00000088827	ENSDARG00000027750	5:30798622-30815636	1	Dr.32560	AL912726	ZDB-GENE-050306-16	dpp7	dipeptidyl-peptidase 7	dipeptidyl-peptidase 7	DPP7	29952
BI840692	0.945073	0.0778502	1.30839	0.10457	1.02064	0.24606	0.0543					Dr.76341	BI844193	ZDB-GENE-050208-49	im:7136639
BI866976	0.944465	0.103334	1.35458	0.085735	1.04121	0.106585	0.0543	ENSDART00000067117	ENSDARG00000041875	11:2394479-2407613	1	Dr.132817	BQ618225	ZDB-GENE-051030-102	zgc:123326
BI885359	0.964598	0.0891482	0.677817	0.0580389	0.864716	0.160994	0.0543	ENSDART00000140665	ENSDARG00000002013	19:23622432-23736084	-1	Dr.105808	EB894957	ZDB-GENE-040822-32	grb10a
BI892373	1.04697	0.0915898	1.5149	0.147355	1.22251	0.174306	0.0543
BI982111	1.09341	0.0985874	0.741805	0.0770694	0.966125	0.122398	0.0543					Dr.12766	BI879438
BM024762	0.923326	0.117015	1.63083	0.25771	0.937144	0.168218	0.0543	ENSDART00000040328	ENSDARG00000029406	5:32173724-32174335	-1	Dr.114938	AL908033	ZDB-GENE-040426-987	h2afx	H2A histone family, member X	H2A histone family, member X	H2AFX	3014
BM096052	0.898391	0.0874869	1.26091	0.0873292	0.973697	0.180515	0.0543	ENSDART00000149511	ENSDARG00000012274	13:18360485-18373437	1	Dr.143242	CO812256
X85735	0.927693	0.163927	0.484124	0.0794551	0.899677	0.167171	0.0543					Dr.132864	X85735	ZDB-GENE-980526-558	wt1a	wilms tumor 1a	Wilms tumor 1	WT1	7490
AW171171	1.02757	0.101388	0.731788	0.0508713	0.77619	0.102856	0.0544	ENSDART00000076425	ENSDARG00000054264	7:30360794-30375776	1	Dr.75313	AL922032	ZDB-GENE-060312-33	zgc:136860
AA497153	0.992103	0.069499	1.52209	0.199081	1.19415	0.169769	0.0551	ENSDART00000044859	ENSDARG00000015538	3:34319325-34330321	1	Dr.75339	EB917550	ZDB-GENE-040426-2273	znf207a	zinc finger protein 207, a	zinc finger protein 207	ZNF207	7756
AI396633	1.04627	0.163166	1.78462	0.215492	1.39015	0.156909	0.0551	ENSDART00000039660	ENSDARG00000019353	14:26948448-26966413	-1	Dr.75554	AI330482	ZDB-GENE-030131-9	sparc	secreted acidic cysteine rich glycoprotein	secreted protein, acidic, cysteine-rich (osteonectin)	SPARC	6678
AI641768	1.0154	0.0484568	1.21175	0.0499029	1.04257	0.0857161	0.0551					Dr.20193	AA497258	ZDB-GENE-040808-67	kras	v-Ki-ras2 Kirsten rat sarcoma viral oncogene homolog	v-Ki-ras2 Kirsten rat sarcoma viral oncogene homolog	KRAS	3845
AI883945	1.06713	0.144852	0.591422	0.100172	0.9588	0.182925	0.0551	ENSDART00000126149	ENSDARG00000089574	15:33490638-33511731	1	Dr.111304	AI883945	ZDB-GENE-070112-1202	zgc:158328
AW174300	0.924675	0.0982145	1.33849	0.1104	1.0807	0.165035	0.0551	ENSDART00000134318	ENSDARG00000003827	13:37991813-37997837	-1	Dr.9637	AW455003	ZDB-GENE-040426-716	snapc1b	small nuclear RNA activating complex, polypeptide 1b	small nuclear RNA activating complex, polypeptide 1, 43kDa	SNAPC1	6617
BG304212	0.893822	0.139364	0.544263	0.0317384	0.731038	0.147995	0.0551	ENSDART00000032331	ENSDARG00000023498	6:13416027-13423416	1	Dr.82480	BG304212	ZDB-GENE-040426-1550	gmppab	GDP-mannose pyrophosphorylase Ab	GDP-mannose pyrophosphorylase A	GMPPA	29926
BG728437	0.961242	0.14369	1.68803	0.243278	0.992269	0.245377	0.0551
BI671081	0.957808	0.102778	0.634857	0.0661293	0.67636	0.109632	0.0551	ENSDART00000128744	ENSDARG00000043359	14:51484265-51505292	1	Dr.82631	BI709474	ZDB-GENE-040426-1744	rmnd5b	required for meiotic nuclear division 5 homolog B (S. cerevisiae)	required for meiotic nuclear division 5 homolog B (S. cerevisiae)	RMND5B	64777
BI878477	0.998573	0.0455518	1.37702	0.135238	1.21488	0.178313	0.0551	ENSDART00000099280	ENSDARG00000068600	21:44314196-44325749	-1	Dr.76860	BC046014	ZDB-GENE-030131-7077	wu:fk75d08
BI879430	0.988793	0.0983273	1.40971	0.110264	0.793717	0.19451	0.0551	ENSDART00000139083	ENSDARG00000035798	19:41817433-41819885	1	Dr.142139	BI706840
BI983566	0.951678	0.112897	0.591259	0.0754272	0.71503	0.116728	0.0551	ENSDART00000052503	ENSDARG00000036158	19:23245378-23329742	-1	Dr.123436	CK703408
BM024634	1.02192	0.0625605	0.825765	0.0362243	1.17207	0.0793814	0.0551	ENSDART00000052423	ENSDARG00000078308	1:4171021-4174337	1	Dr.143219	BE201487	ZDB-GENE-030131-7038	spry2
BI430377	0.939138	0.0894167	1.72472	0.315854	2.03672	0.483488	0.0559	ENSDART00000133441	ENSDARG00000019501	21:26970152-27014095	-1	Dr.69681	BG892073	ZDB-GENE-050809-89	im:7160157
BI880302	0.962353	0.0595907	1.29555	0.11184	1.34842	0.10906	0.0559	ENSDART00000129339	ENSDARG00000037965	3:32774399-32787254	1	Dr.82712	BF938327	ZDB-GENE-050522-399	srrm2	serine/arginine repetitive matrix 2	serine/arginine repetitive matrix 2	SRRM2	23524
BI980610	1.00138	0.141032	1.70309	0.238492	0.916079	0.219947	0.0559	ENSDART00000081663	ENSDARG00000058734	2:5749025-5758079	-1	Dr.81710	BI980131	ZDB-GENE-050320-35	prdx1
BM071221	0.956497	0.107899	1.39125	0.107656	0.961837	0.166561	0.0559	ENSDART00000079385	ENSDARG00000056830	14:23481738-23498426	-1	Dr.159914	BI428275
BG302711	1.0355	0.0875177	1.39453	0.0973803	1.12822	0.0886995	0.0572	ENSDART00000012442	ENSDARG00000002790	2:9578714-9607449	-1	Dr.154972	FP225526
BI318080	0.96341	0.0905404	1.40955	0.147452	1.02312	0.116405	0.0572	ENSDART00000121859	ENSDARG00000090063	25:13991020-14046662	-1	Dr.82571	BI883917
BI673743	0.998429	0.165835	0.5722	0.0747883	0.919544	0.0771929	0.0572	ENSDART00000129392	ENSDARG00000087556	17:27699203-27765732	1	Dr.118927	AW203005
BM155356	0.999489	0.0744302	1.27397	0.0582812	0.982193	0.119083	0.0572	ENSDART00000112112	ENSDARG00000075709	9:693672-694497	-1	Dr.133151	BC065328
AI384725	0.9938	0.103284	1.41329	0.111863	1.51174	0.420018	0.0577					Dr.24997	AI384725	ZDB-GENE-030131-8443	wu:fb12a05
AI588107	1.11225	0.100872	0.815754	0.0569703	0.980493	0.0795651	0.0577					Dr.75438	AA497239	ZDB-GENE-050417-423	fibinb	fin bud initiation factor b	fin bud initiation factor	FIBIN	387758
BM071298	0.953845	0.123143	1.41133	0.0763666	0.956278	0.134404	0.058	ENSDART00000015517	ENSDARG00000005220	24:12531618-12591540	-1	Dr.84415	EH463483	ZDB-GENE-040426-1307	pdcd6	programmed cell death 6	programmed cell death 6	PDCD6	10016
AF012751	0.90374	0.175619	0.46746	0.0813294	0.80976	0.0702137	0.0584	ENSDART00000060122	ENSDARG00000025658	15:30653398-30655186	-1	Dr.75771	AF012751	ZDB-GENE-010308-19	or111-2
AF165817	1.07544	0.147016	0.675465	0.0767717	1.0006	0.141922	0.0584	ENSDART00000051361	ENSDARG00000012944	5:33844138-33855190	1	Dr.132846	CO933584	ZDB-GENE-030131-8061	si:dkey-175g6.2
AF337035	1.00698	0.082196	0.779311	0.0345383	0.998757	0.159616	0.0584	ENSDART00000014877	ENSDARG00000014891	15:37845184-37976261	-1	Dr.83334	CN173823	ZDB-GENE-001019-1	robo2	roundabout homolog 2	roundabout, axon guidance receptor, homolog 2 (Drosophila)	ROBO2	6092
AF359424	0.893759	0.111199	1.38111	0.152457	0.694639	0.184109	0.0584	ENSDART00000146094	ENSDARG00000043133	15:2642061-2643914	-1	Dr.159463	NM_131766	ZDB-GENE-010328-6	cldnf
AF448140	1.11141	0.204365	0.645595	0.0611338	0.871944	0.218212	0.0584	ENSDART00000102459	ENSDARG00000070038	15:5697322-5708818	-1	Dr.77311	EB875301	ZDB-GENE-020320-2	rbp2a	retinol binding protein 2a, cellular	retinol binding protein 2, cellular	RBP2	5948
AI722297	1.07449	0.205629	0.618463	0.0291787	1.221	0.271861	0.0584					Dr.154164	EE211912
AW154073	0.979898	0.102073	1.37138	0.0959498	0.875587	0.0639917	0.0584	ENSDART00000057423	ENSDARG00000039302	4:62065768-62081128	1	Dr.76815	AW777584	ZDB-GENE-020419-38	terfa
AW184334	0.983057	0.0884933	0.726251	0.0506419	0.975416	0.0985172	0.0584					Dr.80783	EB778338
BG305274	0.884928	0.130154	1.39248	0.116126	1.65218	0.315591	0.0584	ENSDART00000123271	ENSDARG00000041157	1:2692808-2706447	1	Dr.31451	BI473112	ZDB-GENE-030131-8292	rcan1	regulator of calcineurin 1	regulator of calcineurin 1	RCAN1	1827
BI429526	0.964927	0.0818531	1.55705	0.2362	1.33396	0.181504	0.0584					Dr.159845	BM081320
BI890160	1.01255	0.0557568	0.786431	0.058975	0.804755	0.0894237	0.0584	ENSDART00000035628	ENSDARG00000022415	16:56124679-56140585	-1	Dr.83692	BI886762
BI979304	0.978787	0.0755002	0.576966	0.0946864	1.13835	0.205858	0.0584	ENSDART00000033923	ENSDARG00000026454	5:60690578-60694363	-1	Dr.86043	BI979304	ZDB-GENE-040426-1372	zgc:64116
BQ614948	0.998974	0.128811	1.54344	0.16244	1.00042	0.217384	0.0584	ENSDART00000139535	ENSDARG00000044751	21:13912189-13914539	1	Dr.77083	EB833753	ZDB-GENE-040625-160	ddt	D-dopachrome tautomerase	D-dopachrome tautomerase	DDT	1652
NM_131106	0.929202	0.114865	1.38343	0.114162	1.0385	0.129374	0.0584	ENSDART00000009827	ENSDARG00000023031	16:23011103-23013613	1	Dr.82597	FP171826	ZDB-GENE-990415-98	hoxa2b	homeo box A2b	homeo box A2	HOXA2	3199
X89013-1	0.987559	0.0700236	0.754906	0.0532781	0.666663	0.106158	0.0584
BI887062	1.0039	0.0583772	0.657538	0.0907572	0.92892	0.0873087	0.0587	ENSDART00000139490	ENSDARG00000059973	13:49372342-49380033	1	Dr.15421	AW420595	ZDB-GENE-061103-70	fbxo11a	F-box protein 11a	F-box protein 11	FBXO11	80204
BI892407	1.00571	0.0593528	0.647044	0.0934843	0.655563	0.183449	0.0587
BI318628	1.01398	0.109004	0.727691	0.0451604	0.876943	0.0902765	0.0588	ENSDART00000055152	ENSDARG00000037855	23:325336-329694	1	Dr.83629	BI533946	ZDB-GENE-040718-283	taf11	TAF11 RNA polymerase II, TATA box binding protein (TBP)-associated factor	TAF11 RNA polymerase II, TATA box binding protein (TBP)-associated factor, 28kDa	TAF11	6882
BI878064	0.963022	0.0960908	1.65529	0.292174	1.31038	0.166936	0.0588					Dr.30001	CK692829
BI981571	0.919932	0.106082	1.46867	0.201479	0.903443	0.196228	0.0588	ENSDART00000008302	ENSDARG00000011948	2:37265784-37353729	-1	Dr.85773	BI983089	ZDB-GENE-020503-3	insra	insulin receptor a	insulin receptor	INSR	3643
U93476	1.11725	0.171805	0.702073	0.0612381	0.63043	0.0525941	0.0588	ENSDART00000123458	ENSDARG00000044525	22:986748-1002624	1
AW115598	1.02326	0.0894099	1.41574	0.124596	1.00956	0.0697597	0.0589	ENSDART00000056921	ENSDARG00000005458	2:22496685-22536392	1	Dr.45418	DN900542	ZDB-GENE-030131-6445	csnk1g2a	casein kinase 1, gamma 2a	casein kinase 1, gamma 2	CSNK1G2	1455
BI708733	1.10014	0.141206	0.673876	0.0943499	0.750591	0.0814582	0.0589
AF163311	0.99539	0.0571875	0.744245	0.0682977	1.00917	0.0830281	0.0616	ENSDART00000144318	ENSDARG00000004932	22:41869274-41959133	1	Dr.80861	EB768996	ZDB-GENE-000201-13	kal1b	Kallmann syndrome 1b sequence	Kallmann syndrome 1 sequence	KAL1	3730
AI584349	1.02786	0.0786824	0.79728	0.0480467	1.11693	0.157191	0.0616	ENSDART00000129489	ENSDARG00000070643	1:572580-658993	1	Dr.77580	AI584349	ZDB-GENE-030131-1928	zgc:65781
AA494792	1.00146	0.101112	1.44376	0.145672	0.939101	0.104967	0.0619					Dr.75969	FP163127	ZDB-GENE-030131-8670	zgc:77235
AI353244	1.06227	0.0853445	0.828981	0.040128	0.739382	0.0542981	0.0619	ENSDART00000122388	ENSDARG00000038401	3:5651654-5669392	1
BI671557	0.95896	0.0476832	1.1416	0.0513542	0.865043	0.135604	0.0619					Dr.16458	BI702430	ZDB-GENE-030827-3	map3k5
BI879523	0.996696	0.146519	2.00274	0.448638	1.73346	0.113618	0.0619	ENSDART00000006604	ENSDARG00000020679	3:34214809-34221668	-1	Dr.76726	AW233522	ZDB-GENE-030131-7860	clpp	ClpP caseinolytic peptidase, ATP-dependent, proteolytic subunit homolog (E. coli)	ClpP caseinolytic peptidase, ATP-dependent, proteolytic subunit homolog (E. coli)	CLPP	8192
BI889917	0.962028	0.185383	0.54079	0.0683036	0.950511	0.293877	0.0619	ENSDART00000017445	ENSDARG00000002445	16:8650398-8662788	-1	Dr.77773	DN892118	ZDB-GENE-030131-2193	prdm1a	PR domain containing 1a, with ZNF domain	PR domain-containing protein 1	PRDM1	639
BI883955	1.0716	0.142293	0.655901	0.091139	1.1887	0.11001	0.0621
AW421803	0.966785	0.0890877	0.557055	0.105352	0.703639	0.0718225	0.0636	ENSDART00000134911	ENSDARG00000055934	9:11012409-11029926	-1	Dr.151481	BC095799	ZDB-GENE-100922-35	si:ch1073-416j23.1
AB026131	0.950002	0.156219	0.563264	0.0747008	1.41861	0.309488	0.0637	ENSDART00000140456	ENSDARG00000092238	15:30705392-30706336	-1	Dr.85380	NM_131745	ZDB-GENE-010308-11	or111-9
AI544892	0.960426	0.0780725	1.30531	0.115434	1.37777	0.257879	0.0637					Dr.38	AA495386	ZDB-GENE-030131-9769	sb:cb307
AI626598	0.919773	0.0953108	0.652542	0.057391	0.962217	0.194354	0.0637
AI942499	0.920076	0.127307	0.54974	0.0850111	1.15319	0.238669	0.0637					Dr.79027	AI793842	ZDB-GENE-030131-3815	wu:fc55a02
BI891492	1.03488	0.109302	1.51197	0.161172	0.851562	0.080622	0.0637	ENSDART00000128153	ENSDARG00000029248	2:8433697-8447444	1	Dr.159479	AI444219
BI891709	1.07398	0.198425	1.96573	0.323864	0.854247	0.0750533	0.0637	ENSDART00000059360	ENSDARG00000040564	18:34147424-34177509	-1	Dr.77145	AW778168	ZDB-GENE-040426-2432	hnrnpul1	heterogeneous nuclear ribonucleoprotein U-like 1	heterogeneous nuclear ribonucleoprotein U-like 1	HNRNPUL1	11100
BI980194	0.930849	0.21353	1.94274	0.405632	1.96731	0.285814	0.0637					Dr.151585	EH515900
BM181691	0.896481	0.140692	1.41832	0.125623	0.986629	0.16691	0.0637	ENSDART00000126697	ENSDARG00000013095	13:2137852-2172612	1	Dr.80394	AW117145	ZDB-GENE-030131-5056	gclc	glutamate-cysteine ligase, catalytic subunit	glutamate-cysteine ligase, catalytic subunit	GCLC	2729
BM182563	0.953674	0.140272	1.54726	0.198277	0.907889	0.130192	0.0637	ENSDART00000145330	ENSDARG00000092170	16:26211419-26213014	1	Dr.159005	CN318194
AI354170	0.887146	0.154654	1.47218	0.159562	0.908839	0.207672	0.0659	ENSDART00000134980	ENSDARG00000095615	16:22398201-22399884	-1	Dr.76583	BI473317
BI325606	1.03274	0.0809524	0.781999	0.0609392	0.530617	0.141647	0.0659	ENSDART00000081960	ENSDARG00000058969	24:17966473-18375807	-1	Dr.16289	BI325606
AI544800	0.969084	0.0791716	0.626689	0.0935954	0.553782	0.199084	0.0679	ENSDART00000003712	ENSDARG00000016918	11:30857134-30871798	-1	Dr.125294	EH534273
AW184550	0.99789	0.066687	0.675731	0.0903844	1.19825	0.0901672	0.0679
BI705677	1.10517	0.113062	0.798115	0.065335	1.05517	0.108917	0.0679	ENSDART00000005847	ENSDARG00000005476	4:19748590-19923254	1	Dr.75272	EH604993	ZDB-GENE-021205-1	nav3	neuron navigator 3	neuron navigator 3	NAV3	89795
AI588336	1.07415	0.128599	0.713777	0.0809051	1.25339	0.226062	0.0688					Dr.132385	AI588336
M34182-1	1.05375	0.0788558	1.36987	0.10196	0.873138	0.134053	0.0688	ENSDART00000122721	ENSDARG00000014134	3:50619997-50664192	-1	Dr.44411	NM_001082840	ZDB-GENE-050114-6	prkacaa	protein kinase, cAMP-dependent, catalytic, alpha, genome duplicate a	protein kinase, cAMP-dependent, catalytic, alpha	PRKACA	5566
U27121	0.974466	0.0853886	1.30592	0.103914	1.43284	0.205668	0.0688	ENSDART00000060150	ENSDARG00000041051	9:31296498-31297700	-1	Dr.75062	BE201883	ZDB-GENE-990415-81	mid1ip1a	MID1 interacting protein 1a	MID1 interacting protein 1 (gastrulation specific G12-like (zebrafish))	MID1IP1	58526
BI884752	0.867715	0.146957	1.4176	0.158848	1.00561	0.0884988	0.0698	ENSDART00000149633	ENSDARG00000023190	15:1602055-1606899	-1	Dr.75173	CD588524	ZDB-GENE-030131-5584	kpna4	karyopherin alpha 4 (importin alpha 3)	karyopherin alpha 4 (importin alpha 3)	KPNA4	3840
BI886435	1.04268	0.148352	0.683382	0.0680311	1.24944	0.0963997	0.0703	ENSDART00000020908	ENSDARG00000015314	5:23857038-23866246	-1	Dr.77787	EB870045	ZDB-GENE-030131-2207	zc4h2	zinc finger, C4H2 domain containing	zinc finger, C4H2 domain containing	ZC4H2	55906
AF369381	0.98403	0.080692	0.668252	0.0841573	0.367246	0.193272	0.0707	ENSDART00000007709	ENSDARG00000011600	2:40095062-40266727	1	Dr.105697	NM_153658	ZDB-GENE-030826-6	epha4b
AW420397	0.922065	0.0894882	0.683683	0.0502758	0.978744	0.0846815	0.0707	ENSDART00000083367	ENSDARG00000037883	15:10338957-10424397	-1	Dr.114433	AW420766	ZDB-GENE-040718-447	prcp	prolylcarboxypeptidase (angiotensinase C)	prolylcarboxypeptidase (angiotensinase C)	PRCP	5547
AI658284	0.927954	0.0665247	1.2228	0.104988	0.805718	0.0532876	0.071					Dr.98239	CT711313
AW420785	0.916269	0.0803612	0.702804	0.0437917	0.598595	0.0842577	0.071	ENSDART00000123191	ENSDARG00000063285	23:5244701-5248066	1	Dr.81555	AW420785	ZDB-GENE-061013-547	ube2t	ubiquitin-conjugating enzyme E2T (putative)	ubiquitin-conjugating enzyme E2T (putative)	UBE2T	29089
BE556955	0.902184	0.116873	1.31414	0.110753	0.941311	0.106325	0.0718	ENSDART00000146996	ENSDARG00000077871	8:42620135-42636879	-1	Dr.122572	BE556955	ZDB-GENE-030131-4497	si:ch211-87l2.1
BI842415	0.945213	0.133119	0.602345	0.0760643	1.01311	0.131683	0.0724					Dr.95260	BI842224
AI641077	0.874106	0.144653	1.36985	0.115504	1.53618	0.190825	0.0728	ENSDART00000105717	ENSDARG00000071475	22:14227844-14259407	-1	Dr.35853	AI641077	ZDB-GENE-001205-2	aox3
AI721479	0.846982	0.107881	0.536066	0.0756682	1.13061	0.327458	0.0728	ENSDART00000024104	ENSDARG00000006837	20:33333327-33338265	1	Dr.75499	AI477486	ZDB-GENE-020711-1	mycn	v-myc myelocytomatosis viral related oncogene, neuroblastoma derived (avian)	v-myc myelocytomatosis viral related oncogene, neuroblastoma derived (avian)	MYCN	4613
BI889313	1.00651	0.104023	1.82219	0.401873	0.713343	0.12744	0.0728	ENSDART00000142408	ENSDARG00000077383	13:16328923-16344191	1	Dr.77310	EE201754	ZDB-GENE-030707-4	anxa11a	annexin A11a	annexin A11	ANXA11	311
ENSDART00000021519	0.989089	0.15844	1.51675	0.102926	1.02397	0.112116	0.0728	ENSDART00000148516	ENSDARG00000017522	19:12256146-12470270	-1	Dr.133831	NM_001002873	ZDB-GENE-040720-1	ctdp1	CTD (carboxy-terminal domain, RNA polymerase II, polypeptide A) phosphatase, subunit 1	CTD (carboxy-terminal domain, RNA polymerase II, polypeptide A) phosphatase, subunit 1	CTDP1	9150
AW171471	0.883584	0.10941	0.594678	0.066808	0.504392	0.059086	0.0749	ENSDART00000026339	ENSDARG00000018961	2:42462491-42476393	-1	Dr.77165	BQ615052	ZDB-GENE-030131-5982	gtpbp4	GTP binding protein 4	GTP binding protein 4	GTPBP4	23560
BI890023	0.824464	0.125014	1.38822	0.227438	0.741772	0.131509	0.0749	ENSDART00000016112	ENSDARG00000013804	15:28465241-28471917	1	Dr.45282	EB881748	ZDB-GENE-030131-5206	capns1b	calpain, small subunit 1 b	calpain, small subunit 1	CAPNS1	826
BE605975	1.09918	0.11322	1.45416	0.0661671	1.05581	0.078457	0.0753	ENSDART00000130403	ENSDARG00000023724	16:40975045-40995909	-1	Dr.148705	BE605975	ZDB-GENE-030131-7251	wu:fl24d12
AW058850	0.997804	0.170359	1.58643	0.152843	1.08478	0.151357	0.0755	ENSDART00000032212	ENSDARG00000027807	20:460751-504156	-1
AW281444	0.961973	0.125269	1.35265	0.0695882	0.777446	0.0912278	0.0806	ENSDART00000016112	ENSDARG00000013804	15:28465241-28471917	1	Dr.45282	AI616855	ZDB-GENE-030131-5206	capns1b	calpain, small subunit 1 b	calpain, small subunit 1	CAPNS1	826
AI641570	0.992155	0.0513222	1.24479	0.0974639	1.27097	0.059479	0.0813
BI882014	1.1626	0.164655	0.783762	0.0712422	1.13159	0.10065	0.0813
AF160625	0.979237	0.175463	0.617932	0.0502417	0.903266	0.158497	0.0815					Dr.152266	CK397493
AI584510	0.893448	0.0755082	1.45937	0.271939	0.699143	0.131968	0.0817	ENSDART00000093228	ENSDARG00000063665	10:4973036-4983552	-1	Dr.18920	AI497549	ZDB-GENE-060421-5255	mat2al	methionine adenosyltransferase II, alpha-like	methionine adenosyltransferase II, alpha	MAT2A	4144
AI584445	0.908918	0.195715	0.527121	0.0558004	0.881913	0.138953	0.0818
BI671809	0.988281	0.125678	1.3824	0.0832947	0.919933	0.0533827	0.0818	ENSDART00000132714	ENSDARG00000039499	13:27264777-27267224	1	Dr.2117	BM531958	ZDB-GENE-030131-2524	soul2
BI709791	0.940719	0.0802487	0.752484	0.0224687	0.924866	0.0649058	0.0818	ENSDART00000130229	ENSDARG00000090219	10:44127556-44141232	-1	Dr.79570	BM103285	ZDB-GENE-040426-990	wdr45
BM187353	0.912524	0.141325	0.610133	0.0444804	0.932231	0.113976	0.0818
BM155683	0.90068	0.0871131	1.18388	0.0776533	0.700212	0.138257	0.0825					Dr.78065	BQ617825	ZDB-GENE-070705-529	si:dkeyp-110c7.1
AA658594	1.01566	0.102936	1.37172	0.111459	0.820762	0.0554576	0.0826	ENSDART00000040926	ENSDARG00000031819	13:30387117-30392499	1	Dr.5489	EB985737	ZDB-GENE-031118-83	eif4ebp2	eukaryotic translation initiation factor 4E binding protein 2	eukaryotic translation initiation factor 4E binding protein 2	EIF4EBP2	1979
AB037940	1.18767	0.292642	0.659531	0.053888	1.02781	0.161024	0.0826	ENSDART00000045385	ENSDARG00000030347	7:16082277-16085567	1	Dr.81260	BC163806	ZDB-GENE-000406-9	mespba	mesoderm posterior ba	mesoderm posterior 1	MESP1	55897
BG308473	0.987985	0.0658954	0.780792	0.0592723	1.20457	0.173646	0.0833	ENSDART00000040810	ENSDARG00000033182	19:32584703-32587248	-1	Dr.82824	BG308553	ZDB-GENE-030219-167	arl4ab	ADP-ribosylation factor-like 4ab	ADP-ribosylation factor-like 4A	ARL4A	10124
BM104073	1.04289	0.127868	0.736064	0.0657704	1.37922	0.243764	0.0833	ENSDART00000125163	ENSDARG00000091031	23:12561613-12592554	1	Dr.104432	AA542462	ZDB-GENE-030131-6830	si:ch211-153a8.4
BQ074959	0.964199	0.243187	0.533093	0.0401826	0.817934	0.151911	0.0838	ENSDART00000058562	ENSDARG00000040041	24:37031305-37056307	-1	Dr.76603	EB794742	ZDB-GENE-030131-9544	mcm4	MCM4 minichromosome maintenance deficient 4, mitotin (S. cerevisiae)	MCM4 minichromosome maintenance deficient 4 (S. cerevisiae)	MCM4	4173
BI867933	0.898207	0.101882	1.28124	0.139016	1.44446	0.231319	0.0865	ENSDART00000051575	ENSDARG00000035573	5:27844086-27847789	1	Dr.84471	BI866881	ZDB-GENE-040625-113	zgc:86811
AW171497	0.928892	0.127704	1.32238	0.0880915	0.888722	0.118359	0.087	ENSDART00000037287	ENSDARG00000091208	16:57691461-57713739	-1	Dr.122259	CD598256
BI980786	1.00204	0.0584797	1.19647	0.0607286	0.907385	0.0863511	0.0872	ENSDART00000131295	ENSDARG00000020527	14:10823540-10854840	1	Dr.104735	AI384234	ZDB-GENE-030131-8491	zgc:172056
BI842451	1.0101	0.0867901	1.51324	0.22996	1.80713	0.199841	0.0873					Dr.123195	BI842258
AW202619	0.994193	0.1603	0.65318	0.0641527	0.994561	0.168198	0.0905					Dr.80828	AW184758	ZDB-GENE-030131-7470	wu:fj19g03
AI657777	1.08795	0.142853	1.86265	0.379927	1.78054	0.320165	0.0907	ENSDART00000092347	ENSDARG00000063292	8:7856930-7884977	1	Dr.132239	AL722119	ZDB-GENE-060929-994	zgc:153440
AF111712	0.950608	0.113551	0.62056	0.0937351	0.572778	0.0789104	0.0921	ENSDART00000067138	ENSDARG00000045660	25:26429998-26441157	-1	Dr.75439	AL725619	ZDB-GENE-030620-1	hic1l
BE605391	0.976872	0.0692694	1.22513	0.0883617	1.4543	0.100523	0.0935	ENSDART00000066439	ENSDARG00000045190	12:18109709-18110818	1	Dr.82220	EB767829	ZDB-GENE-041212-81	ch25h	cholesterol 25-hydroxylase	cholesterol 25-hydroxylase	CH25H	9023
AI793736	1.04194	0.0483691	0.903116	0.0397589	1.14387	0.0886818	0.0956	ENSDART00000078557	ENSDARG00000056127	14:27724742-27728151	1	Dr.143167	EX159141
AW076585	1.04163	0.117546	1.74573	0.364496	0.545024	0.123679	0.0994	ENSDART00000056561	ENSDARG00000038729	21:7136709-7156370	-1	Dr.80190	AL911903	ZDB-GENE-050522-69	s100z	S100 calcium binding protein Z	S100 calcium binding protein Z	S100Z	170591
BI844162	0.959139	0.0926226	1.60118	0.338837	0.789266	0.0494256	0.0994	ENSDART00000124071	ENSDARG00000088373	19:16829023-16841182	-1	Dr.132061	AI721601
BI982955	1.0157	0.0864885	0.753575	0.0798299	0.428174	0.11954	0.0997					Dr.140857	BM024110

## Sheet: S2C_Gill_ExcVsDef
Systematic ID	Control		Deficiency		Excess		t-test	ENSEMBL				NBCI		ZFIN			Human Orthologues
	Normalized	SE	Normalized	SE	Normalized	SE	p	Transcript	Gene	map	sense	Unigene	gb	ID	Symbol	Description	Description	Symbol	Entrez Gene ID
AA658594	1.01566	0.102936	1.37172	0.111459	0.820762	0.0554576	0.0351	ENSDART00000040926	ENSDARG00000031819	13:30387117-30392499	1	Dr.5489	EB985737	ZDB-GENE-031118-83	eif4ebp2	eukaryotic translation initiation factor 4E binding protein 2	eukaryotic translation initiation factor 4E binding protein 2	EIF4EBP2	1979
AW078445	1.03341	0.166871	0.822635	0.103277	2.28199	0.33023	0.0351	ENSDART00000080344	ENSDARG00000057629	19:48267629-48286476	-1	Dr.106505	AW058874	ZDB-GENE-060315-10	slc30a8	solute carrier family 30 (zinc transporter), member 8	solute carrier family 30 member 8	SLC30A8	169026
AW232641	1.17398	0.225842	1.4884	0.142853	0.764025	0.0742978	0.0351	ENSDART00000045329	ENSDARG00000033364	13:46096369-46102191	1	Dr.75902	BQ133238	ZDB-GENE-061215-48	zgc:158387
AW420629	0.896725	0.0961239	0.86872	0.0554068	1.3306	0.0661088	0.0351					Dr.77741	AW420629	ZDB-GENE-030131-9516	lyve1	lymphatic vessel endothelial hyaluronic acid receptor 1	lymphatic vessel endothelial hyaluronan receptor 1	LYVE1	10894
BI534315	0.915566	0.12571	1.25288	0.105423	0.738837	0.0515624	0.0351	ENSDART00000033494	ENSDARG00000029072	24:4219347-4226592	-1	Dr.77265	BE017509	ZDB-GENE-021115-9	copeb	core promoter element binding protein	Kruppel-like factor 6	KLF6	1316
BI671809	0.988281	0.125678	1.3824	0.0832947	0.919933	0.0533827	0.0351	ENSDART00000132714	ENSDARG00000039499	13:27264777-27267224	1	Dr.2117	BM531958	ZDB-GENE-030131-2524	soul2
BI886435	1.04268	0.148352	0.683382	0.0680311	1.24944	0.0963997	0.0351	ENSDART00000020908	ENSDARG00000015314	5:23857038-23866246	-1	Dr.77787	EB870045	ZDB-GENE-030131-2207	zc4h2	zinc finger, C4H2 domain containing	zinc finger, C4H2 domain containing	ZC4H2	55906
AI721511	1.24356	0.443324	1.55403	0.19966	0.621225	0.100402	0.0372	ENSDART00000057321	ENSDARG00000052377	6:23210680-23218565	-1	Dr.51730	AI721511	ZDB-GENE-030131-617	psmd12	proteasome (prosome, macropain) 26S subunit, non-ATPase, 12	proteasome (prosome, macropain) 26S subunit, non-ATPase, 12	PSMD12	5718
AW154073	0.979898	0.102073	1.37138	0.0959498	0.875587	0.0639917	0.0384	ENSDART00000057423	ENSDARG00000039302	4:62065768-62081128	1	Dr.76815	AW777584	ZDB-GENE-020419-38	terfa
BM182231	0.959941	0.162684	0.885721	0.0560066	1.27348	0.0597906	0.0384	ENSDART00000058524	ENSDARG00000032237	20:23462896-23482208	-1	Dr.42075	AW342793	ZDB-GENE-041212-10	zgc:101872
AB026131	0.950002	0.156219	0.563264	0.0747008	1.41861	0.309488	0.0391	ENSDART00000140456	ENSDARG00000092238	15:30705392-30706336	-1	Dr.85380	NM_131745	ZDB-GENE-010308-11	or111-9
AF137534	1.14764	0.371305	2.29365	0.579409	0.536498	0.189232	0.0391					Dr.33261	EE211269	ZDB-GENE-010116-10	mhc1ufa
AF329850	1.01209	0.211927	1.10831	0.0844791	0.638956	0.0857013	0.0391	ENSDART00000145357	ENSDARG00000028386	7:17872141-17878243	1	Dr.76717	BQ450102	ZDB-GENE-001219-1	htatip2	HIV-1 Tat interactive protein 2	HIV-1 Tat interactive protein 2, 30 kD	HTATIP2	10553
AI331251	0.901757	0.113832	0.472381	0.0865014	1.04649	0.129813	0.0391
AI522692	0.920007	0.193976	1.44391	0.264309	0.607475	0.101664	0.0391	ENSDART00000102896	ENSDARG00000032849	19:36508327-36518672	-1	Dr.159069	EH607444
AI588294	1.13506	0.152624	1.08166	0.0460368	0.736285	0.0584996	0.0391					Dr.77761	AI588294	ZDB-GENE-061103-52	mtmr10	myotubularin related protein 10	myotubularin related protein 10	MTMR10	54893
AI626597	1.03996	0.181918	1.36369	0.0991584	0.858146	0.0824951	0.0391					Dr.121844	AI626597
AI658284	0.927954	0.0665247	1.2228	0.104988	0.805718	0.0532876	0.0391					Dr.98239	CT711313
AI721675	1.15156	0.2357	0.884914	0.0824737	1.57776	0.21644	0.0391
AI793440	1.14395	0.202287	1.50715	0.106322	0.860095	0.0972293	0.0391					Dr.105944	AW280078	ZDB-GENE-030131-2705	wu:fc16b08
AI965290	1.03826	0.108742	1.14347	0.0604034	0.806148	0.0668174	0.0391	ENSDART00000123352	ENSDARG00000070723	25:17129588-17139591	-1	Dr.159564	CK738938	ZDB-GENE-050320-20	ndufa9	NADH dehydrogenase (ubiquinone) 1 alpha subcomplex, 9	NADH dehydrogenase (ubiquinone) 1 alpha subcomplex, 9, 39kDa	NDUFA9	4704
AL732415	1.05755	0.114941	1.15711	0.0727442	0.795355	0.0691372	0.0391	ENSDART00000127812	ENSDARG00000062543	19:4685728-4805595	-1	Dr.124165	BQ419892
AW019164	1.23821	0.236588	1.37135	0.104094	0.82595	0.095328	0.0391	ENSDART00000052140	ENSDARG00000035949	19:32633991-32644526	-1	Dr.6262	AW019164	ZDB-GENE-030131-4795	wu:fd60g04
AW076585	1.04163	0.117546	1.74573	0.364496	0.545024	0.123679	0.0391	ENSDART00000056561	ENSDARG00000038729	21:7136709-7156370	-1	Dr.80190	AL911903	ZDB-GENE-050522-69	s100z	S100 calcium binding protein Z	S100 calcium binding protein Z	S100Z	170591
AW077984	0.922312	0.0831041	0.594717	0.0358508	0.955295	0.109879	0.0391					Dr.18486	EG571701	ZDB-GENE-050301-2	pkz
AW116327	0.981741	0.0887931	0.727733	0.0735499	1.17681	0.105708	0.0391	ENSDART00000032880	ENSDARG00000003938	15:25834680-25875330	-1	Dr.76790	CT599089	ZDB-GENE-030912-3	rpa1	replication protein A1	replication protein A1, 70kDa	RPA1	6117
AW165210	0.934991	0.117354	1.16193	0.0813453	0.782601	0.0618293	0.0391					Dr.132372	AI584495	ZDB-GENE-030131-2023	si:dkey-4c15.13
AW170971	0.983462	0.104581	0.978007	0.0260543	1.64173	0.186219	0.0391	ENSDART00000010626	ENSDARG00000001777	10:1623969-1663150	-1	Dr.14749	BM082893	ZDB-GENE-040426-711	nup155	nucleoporin 155	nucleoporin 155kDa	NUP155	9631
AW184187	1.11726	0.362286	0.820479	0.264382	8.31347	6.74686	0.0391	ENSDART00000061007	ENSDARG00000041623	18:17193795-17195147	1	Dr.121290	BQ261526	ZDB-GENE-030131-4174	mt2
AW184550	0.99789	0.066687	0.675731	0.0903844	1.19825	0.0901672	0.0391
AW232794	0.880723	0.222049	1.38672	0.162	0.730284	0.103598	0.0391	ENSDART00000134190	ENSDARG00000056252	8:25894656-25927262	-1	Dr.88290	AW232624	ZDB-GENE-030131-7447	sort1b	sortilin 1b	sortilin 1	SORT1	6272
AW281444	0.961973	0.125269	1.35265	0.0695882	0.777446	0.0912278	0.0391	ENSDART00000016112	ENSDARG00000013804	15:28465241-28471917	1	Dr.45282	AI616855	ZDB-GENE-030131-5206	capns1b	calpain, small subunit 1 b	calpain, small subunit 1	CAPNS1	826
BE016197	0.970921	0.0795444	0.78935	0.0445318	1.06541	0.067138	0.0391	ENSDART00000066946	ENSDARG00000045525	4:24843246-24847118	-1	Dr.77404	BE016259	ZDB-GENE-030131-1811	tmcc3	transmembrane and coiled-coil domain family 3	transmembrane and coiled-coil domain family 3	TMCC3	57458
BE016208	1.06299	0.130823	0.690129	0.0517984	1.15886	0.111355	0.0391	ENSDART00000147056	ENSDARG00000011076	19:5614523-5623435	1	Dr.82020	BE016215	ZDB-GENE-040704-1	zgc:91968
BE201806	0.967678	0.165376	1.38665	0.136795	0.792012	0.0849036	0.0391	ENSDART00000044085	ENSDARG00000090014	22:27058713-27091556	1	Dr.1945	EB763688	ZDB-GENE-040801-227	zgc:92480
BE605975	1.09918	0.11322	1.45416	0.0661671	1.05581	0.078457	0.0391	ENSDART00000130403	ENSDARG00000023724	16:40975045-40995909	-1	Dr.148705	BE605975	ZDB-GENE-030131-7251	wu:fl24d12
BG303447	0.954806	0.0668533	1.46964	0.13021	0.998968	0.049635	0.0391	ENSDART00000085913	ENSDARG00000042091	22:20477396-20484989	-1	Dr.123811	BM774921
BG306422	1.01776	0.0506719	1.30012	0.0848312	0.937673	0.0568732	0.0391					Dr.79819	BM735962	ZDB-GENE-030131-10099	ik:tdsubc_1g11
BG891983	0.934393	0.101927	1.05891	0.0858857	0.670597	0.0552843	0.0391	ENSDART00000057377	ENSDARG00000039269	13:33248149-33257976	1	Dr.122118	EH510509
BI325765	0.892414	0.14067	1.18416	0.130319	0.722925	0.0664511	0.0391	ENSDART00000047541	ENSDARG00000002196	10:26004076-26016671	1	Dr.91614	NM_001020663	ZDB-GENE-050522-220	bach1	BTB and CNC homology 1, basic leucine zipper transcription factor 1	BTB and CNC homology 1, basic leucine zipper transcription factor 1	BACH1	571
BI428543	0.991339	0.0901495	1.1079	0.043695	0.857647	0.0390018	0.0391	ENSDART00000009132	ENSDARG00000012688	19:6042298-6045806	1	Dr.75862	EV560037	ZDB-GENE-030131-956	eif1b	eukaryotic translation initiation factor 1B	eukaryotic translation initiation factor 1B	EIF1B	10289
BI672476	1.04856	0.0790944	1.25371	0.0515032	0.972499	0.0492359	0.0391	ENSDART00000077125	ENSDARG00000054864	18:42784004-42943595	-1	Dr.81900	BI672476	ZDB-GENE-061009-28	aplp2	amyloid beta (A4) precursor-like protein 2	amyloid beta (A4) precursor-like protein 2	APLP2	334
BI673652	1.02838	0.0998389	0.674177	0.0527385	1.0844	0.120314	0.0391
BI704327	1.01737	0.0838089	1.13297	0.071037	0.772107	0.0669966	0.0391	ENSDART00000021813	ENSDARG00000017339	6:19951106-19955767	1	Dr.129625	CT590952
BI705704	1.02305	0.058586	0.902178	0.0524793	1.25891	0.0971022	0.0391	ENSDART00000064391	ENSDARG00000043856	20:2983540-3012265	1	Dr.124992	CK029784
BI840935	1.02663	0.0760927	1.21572	0.0575918	0.861324	0.0692354	0.0391	ENSDART00000134542	ENSDARG00000074758	8:23129314-23150130	-1	Dr.121864	BG727330
BI866969	0.999978	0.0967053	0.80684	0.129944	1.67635	0.230761	0.0391	ENSDART00000134618	ENSDARG00000095632	1:19312466-19334123	-1
BI883955	1.0716	0.142293	0.655901	0.091139	1.1887	0.11001	0.0391
BI886268	0.998331	0.122467	0.808365	0.0596261	1.24283	0.121547	0.0391	ENSDART00000012551	ENSDARG00000009946	22:4124042-4154710	1	Dr.77703	AI588520	ZDB-GENE-040426-2039	uhrf1	ubiquitin-like, containing PHD and RING finger domains, 1	ubiquitin-like, containing PHD and RING finger domains, 1	UHRF1	29128
BI889313	1.00651	0.104023	1.82219	0.401873	0.713343	0.12744	0.0391	ENSDART00000142408	ENSDARG00000077383	13:16328923-16344191	1	Dr.77310	EE201754	ZDB-GENE-030707-4	anxa11a	annexin A11a	annexin A11	ANXA11	311
BI889463	1.00862	0.09348	1.60451	0.0443187	0.993714	0.0963824	0.0391	ENSDART00000113926	ENSDARG00000087243	10:44106419-44116846	-1	Dr.150268	AI385013	ZDB-GENE-030131-2700	wu:fc16a12
BI890262	1.0459	0.0890422	0.907355	0.0750549	1.44987	0.139117	0.0391	ENSDART00000081309	ENSDARG00000092660	6:8144803-8158548	1	Dr.11380	BG308901	ZDB-GENE-080204-68	cyp27c1	cytochrome P450, family 27, subfamily C, polypeptide 1	cytochrome P450, family 27, subfamily C, polypeptide 1	CYP27C1	339761
BI891492	1.03488	0.109302	1.51197	0.161172	0.851562	0.080622	0.0391	ENSDART00000128153	ENSDARG00000029248	2:8433697-8447444	1	Dr.159479	AI444219
BI891709	1.07398	0.198425	1.96573	0.323864	0.854247	0.0750533	0.0391	ENSDART00000059360	ENSDARG00000040564	18:34147424-34177509	-1	Dr.77145	AW778168	ZDB-GENE-040426-2432	hnrnpul1	heterogeneous nuclear ribonucleoprotein U-like 1	heterogeneous nuclear ribonucleoprotein U-like 1	HNRNPUL1	11100
BI892225	0.908257	0.122104	0.74739	0.0787022	1.27671	0.144797	0.0391	ENSDART00000013640	ENSDARG00000061976	8:19456460-19576822	-1
BI980254	1.00815	0.133955	1.1792	0.0736629	0.814071	0.065537	0.0391					Dr.121631	BI979635	ZDB-GENE-030131-8403	si:dkey-71l1.3
BM024634	1.02192	0.0625605	0.825765	0.0362243	1.17207	0.0793814	0.0391	ENSDART00000052423	ENSDARG00000078308	1:4171021-4174337	1	Dr.143219	BE201487	ZDB-GENE-030131-7038	spry2
BM025872	0.909618	0.0723048	0.82432	0.026221	1.07462	0.053291	0.0391	ENSDART00000098390	ENSDARG00000040286	18:49379338-49386776	1	Dr.78246	BM026106	ZDB-GENE-040426-1334	ubl7	ubiquitin-like 7	ubiquitin-like 7 (bone marrow stromal cell-derived)	UBL7	84993
BM071061	0.943068	0.180174	1.13155	0.0577282	0.764988	0.0729413	0.0391	ENSDART00000062787	ENSDARG00000042777	11:6445948-6451947	-1	Dr.76069	AI105829	ZDB-GENE-040426-1631	ndufa11	NADH dehydrogenase (ubiquinone) 1 alpha subcomplex, 11	NADH dehydrogenase (ubiquinone) 1 alpha subcomplex, 11, 14.7kDa	NDUFA11	126328
BM096040	0.971117	0.0747595	1.07763	0.109278	0.673409	0.0505521	0.0391	ENSDART00000002401	ENSDARG00000007764	4:14057181-14069285	-1	Dr.78071	BG303766	ZDB-GENE-040426-776	klhdc10	kelch domain containing 10	kelch domain containing 10	KLHDC10	23008
BM102070	0.96411	0.0841507	0.732719	0.103645	1.43254	0.146326	0.0391	ENSDART00000028115	ENSDARG00000029157	20:2528277-2612754	-1	Dr.34224	BI982769	ZDB-GENE-040724-82	med23	mediator complex subunit 23	mediator complex subunit 23	MED23	9439
BM102105	1.0135	0.137515	1.69247	0.367524	0.674903	0.10711	0.0391	ENSDART00000081477	ENSDARG00000058593	16:8405673-8423408	1	Dr.76319	AW232747	ZDB-GENE-040426-1356	sri
BM183807	1.01419	0.163007	1.55306	0.195719	0.85057	0.0973732	0.0391	ENSDART00000128047	ENSDARG00000052304	6:24021387-24036382	1	Dr.77076	BQ617909	ZDB-GENE-040426-1792	uqcrc1	ubiquinol-cytochrome c reductase core protein I	ubiquinol-cytochrome c reductase core protein I	UQCRC1	7384
BM185191	1.06538	0.110405	1.6202	0.144682	1.02994	0.101385	0.0391	ENSDART00000130396	ENSDARG00000086627	25:32469852-32475931	-1	Dr.106286	AI957690	ZDB-GENE-030131-4395	wu:fc97h11
Z48714	1.06984	0.251564	0.767731	0.0745295	1.40538	0.203421	0.0391	ENSDART00000110754	ENSDARG00000068094	7:54645626-54649094	-1	Dr.83293	BG985562	ZDB-GENE-980526-178	fgf3	fibroblast growth factor 3	fibroblast growth factor 3 (murine mammary tumor virus integration site (v-int-2) oncogene homolog)	FGF3	2248
AA494792	1.00146	0.101112	1.44376	0.145672	0.939101	0.104967	0.0412					Dr.75969	FP163127	ZDB-GENE-030131-8670	zgc:77235
AB032725	0.869592	0.132607	0.638473	0.0660907	1.05636	0.143786	0.0412	ENSDART00000039629	ENSDARG00000034668	19:9439193-9503211	-1	Dr.8323	EB959851	ZDB-GENE-000501-2	celf3a	cugbp, Elav-like family member 3a	CUGBP, Elav-like family member 3	CELF3	11189
AB038320	0.957573	0.0428806	1.07473	0.0592463	0.780895	0.0705421	0.0412	ENSDART00000073847	ENSDARG00000052073	6:51720579-51722453	-1	Dr.81235	EH611424	ZDB-GENE-000330-7	blcap
AF064799	1.09449	0.222295	0.605594	0.130508	1.34908	0.248529	0.0412					Dr.8147	FP136713	ZDB-GENE-990630-12	cntn2	contactin 2	contactin 2 (axonal)	CNTN2	6900
AF064838	0.998386	0.129476	0.805011	0.0875521	1.27833	0.152927	0.0412	ENSDART00000123165	ENSDARG00000076551	5:72815842-72823649	1	Dr.104476	CO360790	ZDB-GENE-071004-17	setd8b	SET domain containing (lysine methyltransferase) 8b	SET domain containing (lysine methyltransferase) 8	SETD8	387893
AF071266	0.959818	0.178673	1.099	0.225636	0.544284	0.0725281	0.0412	ENSDART00000067698	ENSDARG00000046045	11:2148535-2150246	-1	Dr.5729	Y14537	ZDB-GENE-000822-1	hoxc6b	homeo box C6b	homeo box C6	HOXC6	3223
AF143493	1.02554	0.106871	1.28764	0.0676926	1.00466	0.0601593	0.0412	ENSDART00000126038	ENSDARG00000017891	23:2435272-2457630	1	Dr.75910	CT673102	ZDB-GENE-990714-24	tcp1	t-complex polypeptide 1	t-complex 1	TCP1	6950
AF152607	1.04316	0.137706	0.838048	0.149864	1.68622	0.279499	0.0412	ENSDART00000037681	ENSDARG00000024894	5:75451438-75476894	1	Dr.81302	AF179407	ZDB-GENE-991124-7	tbx5a	T-box 5a	T-box 5	TBX5	6910
AF180891	1.1718	0.268159	1.14862	0.100148	1.72481	0.188893	0.0412	ENSDART00000139281	ENSDARG00000017441	1:6504187-6511787	-1	Dr.31421	EB981646	ZDB-GENE-000322-6	mylz3
AF184244	1.09071	0.230792	1.26748	0.0738198	1.00298	0.0515719	0.0412	ENSDART00000098443	ENSDARG00000038695	2:36845430-36855002	-1	Dr.124830	CD598595
AF203736	1.05108	0.0808705	0.93797	0.0579048	1.38033	0.164749	0.0412	ENSDART00000079210	ENSDARG00000056683	24:35029186-35042769	-1	Dr.105878	NM_131719	ZDB-GENE-010131-2	cdk5	cyclin-dependent protein kinase 5	cyclin-dependent kinase 5	CDK5	1020
AF246190	1.10062	0.139595	0.986231	0.087379	1.35726	0.0651159	0.0412	ENSDART00000073438	ENSDARG00000051760	25:38266678-38267237	1	Dr.134331	AF246190	ZDB-GENE-040112-2	igiv1s5
AF250368	1.03344	0.100926	0.6369	0.0576754	1.01611	0.112481	0.0412	ENSDART00000113389	ENSDARG00000003462	21:1970835-1996552	1	Dr.82519	GO936267	ZDB-GENE-000928-1	fech	ferrochelatase	ferrochelatase (protoporphyria)	FECH	2235
AF294839	1.1481	0.205857	0.760205	0.083979	1.61537	0.41405	0.0412	ENSDART00000081459	ENSDARG00000058571	18:6916187-6919753	-1	Dr.78741	EB931844	ZDB-GENE-000921-2	pdp2
AF329855	1.14075	0.600311	0.580907	0.175039	2.53299	1.26345	0.0412	ENSDART00000105709	ENSDARG00000013975	12:31335592-31390202	1	Dr.88013	AL924451	ZDB-GENE-010226-3	gfra1b	gdnf family receptor alpha 1b	GDNF family receptor alpha 1	GFRA1	2674
AF424546	0.995131	0.100277	0.68209	0.0305524	1.03367	0.125118	0.0412					Dr.30483	AF424546
AI353412	1.10425	0.226833	1.6156	0.119478	0.819432	0.186732	0.0412	ENSDART00000124071	ENSDARG00000088373	19:16829023-16841182	-1	Dr.17984	AI331084
AI353694	1.01116	0.179623	1.94678	0.294163	0.61487	0.216997	0.0412	ENSDART00000147769	ENSDARG00000091996	5:32253549-32254918	-1	Dr.76461	AI616557	ZDB-GENE-030131-12	si:ch211-117m20.5
AI477589	1.47825	1.05863	3.73929	3.61115	0.508902	0.115367	0.0412					Dr.11010	EH532290	ZDB-GENE-010116-9	mhc1uea
AI522803	1.03383	0.0891673	0.982623	0.135914	0.536655	0.0926653	0.0412	ENSDART00000034545	ENSDARG00000043173	22:7518342-7521632	1	Dr.34133	AI522803	ZDB-GENE-040801-12	zgc:92745
AI584430	1.05488	0.179784	1.11543	0.0299248	0.733879	0.078854	0.0412	ENSDART00000018083	ENSDARG00000020625	6:31078227-31120674	1	Dr.134606	EB764321
AI584510	0.893448	0.0755082	1.45937	0.271939	0.699143	0.131968	0.0412	ENSDART00000093228	ENSDARG00000063665	10:4973036-4983552	-1	Dr.18920	AI497549	ZDB-GENE-060421-5255	mat2al	methionine adenosyltransferase II, alpha-like	methionine adenosyltransferase II, alpha	MAT2A	4144
AI601327	0.980142	0.0837758	1.25132	0.138458	0.800433	0.0301376	0.0412					Dr.77893	EB983392	ZDB-GENE-030131-2493	wu:fc09g05
AI626465	1.05837	0.103306	1.05974	0.0589541	0.754645	0.075581	0.0412					Dr.27420	CT590491	ZDB-GENE-030131-2388	wu:fc06e12
AI641380	0.904392	0.130537	0.986297	0.11256	0.428013	0.116585	0.0412	ENSDART00000111509	ENSDARG00000079483	10:45681270-45711521	-1
AI641662	1.01255	0.0696204	0.823986	0.0939565	1.32602	0.121784	0.0412					Dr.136357	CT701776	ZDB-GENE-030131-2946	wu:fc22b04
AI658333	1.047	0.104046	1.66436	0.128231	1.06439	0.13397	0.0412	ENSDART00000039865	ENSDARG00000030139	15:20646077-20654272	-1	Dr.77224	EV561679	ZDB-GENE-040822-17	sdhdb	succinate dehydrogenase complex, subunit D, integral membrane protein b	succinate dehydrogenase complex, subunit D, integral membrane protein	SDHD	6392
AI667496	1.09347	0.192878	1.49324	0.177772	0.935434	0.0856974	0.0412	ENSDART00000124181	ENSDARG00000017929	24:14242815-14349067	1	Dr.78658	AI667496
AI721506	0.932841	0.132772	0.541984	0.170651	1.61213	0.403908	0.0412
AI722054	0.890156	0.124597	0.786417	0.0823748	1.29281	0.178592	0.0412
AI722297	1.07449	0.205629	0.618463	0.0291787	1.221	0.271861	0.0412					Dr.154164	EE211912
AI722366	0.980795	0.0927747	0.824986	0.0873748	1.23211	0.0770399	0.0412
AI722843	1.01093	0.156989	0.961586	0.0690947	1.35721	0.134967	0.0412	ENSDART00000055787	ENSDARG00000038281	3:15422243-15428699	1	Dr.141971	AI722843	ZDB-GENE-050306-19	zgc:110779	zgc:110779	chromosome 17 open reading frame 103	C17orf103	256302
AI723154	0.949515	0.122162	1.05316	0.101454	0.666634	0.0778762	0.0412	ENSDART00000131780	ENSDARG00000075560	2:12811560-12829533	1	Dr.138107	AW019620	ZDB-GENE-070705-340	mll3b	myeloid/lymphoid or mixed-lineage leukemia 3b	myeloid/lymphoid or mixed-lineage leukemia 3	MLL3	58508
AI793355	0.88429	0.0959224	0.925375	0.0418534	1.27757	0.101298	0.0412
AI793437	0.834769	0.116411	0.923307	0.0633535	0.619901	0.0673104	0.0412					Dr.150439	AI793437	ZDB-GENE-030131-4060	wu:fc67d01
AI878102	1.04405	0.174689	0.994979	0.109593	1.64592	0.236364	0.0412
AI878424	1.08102	0.103773	1.22689	0.190822	0.681143	0.084833	0.0412					Dr.52681	AI878424
AI878797	1.08911	0.124627	1.37702	0.123855	0.828785	0.111621	0.0412	ENSDART00000003922	ENSDARG00000021991	13:24925648-24941278	-1	Dr.75146	AW777784
AI883343	1.25657	0.218764	1.69204	0.232584	1.06091	0.0676122	0.0412	ENSDART00000040804	ENSDARG00000032535	8:46635052-46646147	1	Dr.131979	EH464006
AI884159	0.972611	0.0764665	0.785507	0.134053	1.45192	0.215863	0.0412
AI942499	0.920076	0.127307	0.54974	0.0850111	1.15319	0.238669	0.0412					Dr.79027	AI793842	ZDB-GENE-030131-3815	wu:fc55a02
AI942747	1.17799	0.244035	0.773162	0.108573	1.40832	0.223782	0.0412
AI959074	0.969217	0.102992	1.08538	0.0662011	0.779553	0.0699249	0.0412	ENSDART00000090528	ENSDARG00000021309	6:48323192-48358433	-1	Dr.75611	EB784930	ZDB-GENE-040426-1337	rhoae	ras homolog gene family, member Ae	ras homolog gene family, member A	RHOA	387
AI959644	0.954378	0.104582	1.17438	0.122881	0.776133	0.0566721	0.0412	ENSDART00000143225	ENSDARG00000093494	1:52892868-52895323	1	Dr.66624	EH279231	ZDB-GENE-061207-21	si:ch211-217k17.9
AJ249490	1.02095	0.205711	0.8108	0.0901196	1.84849	0.474255	0.0412	ENSDART00000101601	ENSDARG00000057328	7:19193861-19196954	1	Dr.621	EB883344	ZDB-GENE-990806-20	cth1
AW019798	0.96236	0.151037	1.06508	0.239807	0.452819	0.0846858	0.0412	ENSDART00000053001	ENSDARG00000036481	5:28440014-28450649	1	Dr.132672	BI879259	ZDB-GENE-030131-4648	si:ch211-102c2.6
AW058744	1.02222	0.144518	1.33638	0.0820419	0.867616	0.103487	0.0412	ENSDART00000128079	ENSDARG00000012684	4:15143525-15177518	-1	Dr.76148	EB862560	ZDB-GENE-030925-29	atp2b1a	ATPase, Ca++ transporting, plasma membrane 1a	ATPase, Ca transporting, plasma membrane 1	ATP2B1	490
AW058994	0.95849	0.0770652	1.12367	0.055906	0.736281	0.091013	0.0412					Dr.151159	BM182287	ZDB-GENE-070508-4	g6pd	glucose-6-phosphate dehydrogenase	glucose-6-phosphate dehydrogenase	G6PD	2539
AW077850	0.933398	0.150229	1.3544	0.167878	0.835359	0.0695255	0.0412					Dr.132704	AW077850	ZDB-GENE-030131-9377	wu:fj67d03
AW115515	0.956815	0.0786892	0.917045	0.0660514	1.43425	0.162754	0.0412	ENSDART00000041402	ENSDARG00000001953	4:24560099-24572537	-1	Dr.78868	CT641496	ZDB-GENE-040426-2724	pfkfb3	6-phosphofructo-2-kinase/fructose-2,6-biphosphatase 3	6-phosphofructo-2-kinase/fructose-2,6-biphosphatase 3	PFKFB3	5209
AW115598	1.02326	0.0894099	1.41574	0.124596	1.00956	0.0697597	0.0412	ENSDART00000056921	ENSDARG00000005458	2:22496685-22536392	1	Dr.45418	DN900542	ZDB-GENE-030131-6445	csnk1g2a	casein kinase 1, gamma 2a	casein kinase 1, gamma 2	CSNK1G2	1455
AW116237	1.0127	0.0990788	0.918136	0.0494224	1.36858	0.149689	0.0412	ENSDART00000007642	ENSDARG00000077664	19:44011706-44023863	-1	Dr.76047	EH559262	ZDB-GENE-030131-5177	atp5l
AW116389	1.03579	0.281803	0.60948	0.0820077	0.985971	0.103713	0.0412	ENSDART00000078924	ENSDARG00000056447	19:16724681-16737186	-1	Dr.79368	EB843618	ZDB-GENE-040908-1	sf3a3	splicing factor 3a, subunit 3	splicing factor 3a, subunit 3, 60kDa	SF3A3	10946
AW128548	1.00887	0.0641034	1.05622	0.0829416	0.76469	0.0469578	0.0412
AW174107	1.06597	0.233355	1.48527	0.146638	0.99457	0.100626	0.0412	ENSDART00000122162	ENSDARG00000091554	Zv9_scaffold3528:88952-109891	1	Dr.33724	AW421722	ZDB-GENE-030131-6218	fam129bb	family with sequence similarity 129, member Bb	family with sequence similarity 129, member B	FAM129B	64855
AW174511	1.05369	0.0626972	1.22215	0.0864701	0.866118	0.0619096	0.0412	ENSDART00000022242	ENSDARG00000034270	8:47918943-47988735	-1	Dr.104542	EB887760	ZDB-GENE-030131-2143	ogdha	oxoglutarate (alpha-ketoglutarate) dehydrogenase a (lipoamide)	oxoglutarate (alpha-ketoglutarate) dehydrogenase (lipoamide)	OGDH	4967
AW175494	0.935949	0.115093	1.34763	0.169582	0.758915	0.0960261	0.0412	ENSDART00000123895	ENSDARG00000056677	1:13300931-13311472	-1	Dr.80565	EE211085	ZDB-GENE-040426-778	chic2	cysteine-rich hydrophobic domain 2	cysteine-rich hydrophobic domain 2	CHIC2	26511
AW202780	0.976131	0.195976	0.591369	0.1118	1.41899	0.385395	0.0412	ENSDART00000064633	ENSDARG00000044023	17:8699586-8707902	-1	Dr.80845	AW202780	ZDB-GENE-030131-7503	si:rp71-40n14.1
AW281649	0.930639	0.0681746	1.14811	0.116708	0.743892	0.0643897	0.0412	ENSDART00000086583	ENSDARG00000061023	8:26815776-26824495	1	Dr.7451	BI979197	ZDB-GENE-060531-151	si:dkey-72l14.4
AW282121	0.916911	0.122454	1.16507	0.0991886	0.704015	0.0948429	0.0412	ENSDART00000014473	ENSDARG00000017906	25:30047197-30052933	-1	Dr.78089	BM025928	ZDB-GENE-050522-133	cox5aa	cytochrome c oxidase subunit Vaa	cytochrome c oxidase subunit Va	COX5A	9377
AW343936	1.14986	0.146724	0.938577	0.0827675	1.37388	0.112558	0.0412	ENSDART00000126094	ENSDARG00000062372	22:17436746-17457756	1	Dr.81347	AW343936	ZDB-GENE-050208-422	nrd1	nardilysin (N-arginine dibasic convertase)	nardilysin (N-arginine dibasic convertase)	NRD1	4898
AW420397	0.922065	0.0894882	0.683683	0.0502758	0.978744	0.0846815	0.0412	ENSDART00000083367	ENSDARG00000037883	15:10338957-10424397	-1	Dr.114433	AW420766	ZDB-GENE-040718-447	prcp	prolylcarboxypeptidase (angiotensinase C)	prolylcarboxypeptidase (angiotensinase C)	PRCP	5547
AW420695	0.975607	0.0838843	0.782377	0.05341	1.03452	0.0641601	0.0412					Dr.124876	CD606463
AW422248	1.01115	0.0953176	0.523445	0.0720876	1.06003	0.186573	0.0412	ENSDART00000112177	ENSDARG00000074915	1:52046090-52054756	1	Dr.81524	AL910770	ZDB-GENE-080204-12	etaa1	Ewing tumor-associated antigen 1	Ewing tumor-associated antigen 1	ETAA1	54465
AW422582	1.13575	0.144995	0.855756	0.0789268	1.33412	0.170175	0.0412	ENSDART00000128253	ENSDARG00000089700	24:43809657-43815225	1	Dr.32781	EB932149	ZDB-GENE-040426-2946	zfp161	zinc finger protein 161 homolog (mouse)	zinc finger protein 161 homolog (mouse)	ZFP161	7541
AW595123	1.14734	0.15935	1.42186	0.112318	1.05661	0.0742898	0.0412	ENSDART00000087065	ENSDARG00000061226	12:35487183-35531581	-1	Dr.159431	AW595123
BE016688	1.01227	0.159369	1.10061	0.0546787	0.709187	0.097677	0.0412	ENSDART00000141616	ENSDARG00000021787	16:21497823-21525694	-1	Dr.78482	AI722858	ZDB-GENE-030131-6414	abcb5	ATP-binding cassette, sub-family B (MDR/TAP), member 5	ATP-binding cassette, sub-family B (MDR/TAP), member 5	ABCB5	340273
BE017078	1.01983	0.122702	0.938887	0.0578555	1.30326	0.102811	0.0412
BE557760	0.967689	0.0893784	0.883793	0.0404018	0.717239	0.0373454	0.0412	ENSDART00000012143	ENSDARG00000059000	2:3962396-3964308	1	Dr.82044	BG799307	ZDB-GENE-040912-153	cyp8b3
BF717695	0.958885	0.0666995	0.946156	0.0903748	1.52279	0.211507	0.0412	ENSDART00000050006	ENSDARG00000033662	12:49688998-49699500	1	Dr.105241	CD015034	ZDB-GENE-031106-3	scd	stearoyl-CoA desaturase (delta-9-desaturase)	stearoyl-CoA desaturase (delta-9-desaturase)	SCD	6319
BF717893	1.00991	0.163746	1.34334	0.160693	0.738821	0.11327	0.0412	ENSDART00000100769	ENSDARG00000031336	5:39801264-39815264	1	Dr.82567	EB900379	ZDB-GENE-030804-21	hsd20b2
BF938859	0.949255	0.159987	1.09996	0.151041	0.66129	0.0774295	0.0412	ENSDART00000037065	ENSDARG00000024564	20:34992080-35010163	-1	Dr.82774	BF938859	ZDB-GENE-041010-211	sccpdhb	saccharopine dehydrogenase b	saccharopine dehydrogenase (putative)	SCCPDH	51097
BG303317	1.02658	0.169789	0.743745	0.0797621	1.25175	0.136196	0.0412
BG304198	1.01957	0.0393825	0.968192	0.101986	1.88666	0.342193	0.0412	ENSDART00000067078	ENSDARG00000025902	11:25398965-25471874	-1	Dr.122708	BG304198
BG304278	0.996655	0.129714	0.836031	0.0352856	1.07058	0.0799853	0.0412	ENSDART00000017391	ENSDARG00000021047	3:42801601-42835553	-1	Dr.387	AW232155	ZDB-GENE-040426-2776	zc3h7a	zinc finger CCCH-type containing 7A	zinc finger CCCH-type containing 7A	ZC3H7A	29066
BG308730	1.01819	0.069026	0.575653	0.0596327	1.06777	0.175194	0.0412					Dr.122675	BG308730
BG799048	1.10441	0.17456	1.19387	0.0503591	0.959532	0.0590972	0.0412	ENSDART00000057484	ENSDARG00000039335	9:6123512-6164114	1	Dr.82299	BG799048	ZDB-GENE-060322-4	st6gal2	ST6 beta-galactosamide alpha-2,6-sialyltranferase 2	ST6 beta-galactosamide alpha-2,6-sialyltranferase 2	ST6GAL2	84620
BG799445	0.997475	0.148887	0.52429	0.0789896	1.1227	0.251106	0.0412	ENSDART00000074984	ENSDARG00000053022	10:6162239-6163204	1
BG884551	1.03377	0.119069	1.29988	0.165067	0.724157	0.104266	0.0412					Dr.159812	BI326592	ZDB-GENE-030131-9640	wu:fp02c03
BG884568	0.927066	0.0860099	0.918832	0.0654969	0.655629	0.0487681	0.0412	ENSDART00000110058	ENSDARG00000074756	17:11921921-11936767	1	Dr.36376	BI326613	ZDB-GENE-070521-3	tfb2m	transcription factor B2, mitochondrial	transcription factor B2, mitochondrial	TFB2M	64216
BG884572	0.913286	0.0577931	0.765188	0.0973197	1.24494	0.0679521	0.0412	ENSDART00000112061	ENSDARG00000074169	12:33191100-33221664	1
BG891854	1.14906	0.189096	1.20963	0.121031	0.816912	0.0628985	0.0412					Dr.159994	BG891854
BI326537	0.991529	0.0579631	0.931927	0.070602	1.32837	0.111228	0.0412	ENSDART00000077839	ENSDARG00000055481	6:39545945-39562028	-1	Dr.115346	BI326537	ZDB-GENE-030131-3028	atf7b	activating transcription factor 7b	activating transcription factor 7	ATF7	11016
BI428991	1.04657	0.129999	1.17917	0.0928385	0.684085	0.111188	0.0412	ENSDART00000003240	ENSDARG00000020048	25:13540934-13552882	-1	Dr.120733	EB843352	ZDB-GENE-030131-1145	map1lc3b	microtubule-associated protein 1 light chain 3 beta	microtubule-associated protein 1 light chain 3 beta	MAP1LC3B	81631
BI670950	0.933342	0.0796881	1.53963	0.10087	0.981449	0.12371	0.0412	ENSDART00000025348	ENSDARG00000016360	24:21549815-21565207	-1	Dr.120536	BI670950
BI670964	0.895472	0.126033	0.993279	0.0694814	1.33373	0.0792934	0.0412	ENSDART00000037879	ENSDARG00000011989	5:38532881-38536606	1	Dr.14325	BI670964	ZDB-GENE-010403-1	crx	cone-rod homeobox	cone-rod homeobox	CRX	1406
BI671147	1.03192	0.102885	1.13944	0.0819841	0.645457	0.103267	0.0412
BI671374	0.953467	0.39063	1.14478	0.134577	0.533093	0.132514	0.0412	ENSDART00000104613	ENSDARG00000070958	22:40957131-40993404	-1
BI673663	0.965158	0.0759482	1.02834	0.0908212	0.745106	0.0524229	0.0412	ENSDART00000003435	ENSDARG00000009806	10:41257326-41269140	1	Dr.83514	BQ092466	ZDB-GENE-040426-1709	smfn
BI673675	0.913422	0.0927877	0.812781	0.0502487	1.18026	0.13379	0.0412	ENSDART00000123019	ENSDARG00000055653	24:40754368-40762124	-1	Dr.5714	AI384717	ZDB-GENE-051023-10	nubp2
BI673743	0.998429	0.165835	0.5722	0.0747883	0.919544	0.0771929	0.0412	ENSDART00000129392	ENSDARG00000087556	17:27699203-27765732	1	Dr.118927	AW203005
BI703201	1.19194	0.504133	0.653914	0.0628147	1.20602	0.216659	0.0412
BI704370	0.910891	0.113169	0.929108	0.141344	1.85111	0.375867	0.0412	ENSDART00000027616	ENSDARG00000020377	7:67327490-67347861	-1	Dr.29749	CT624957	ZDB-GENE-030131-2173	eif4g2a	eukaryotic translation initiation factor 4, gamma 2a	eukaryotic translation initiation factor 4 gamma, 2	EIF4G2	1982
BI704376	0.906866	0.11037	1.03668	0.0723414	0.741198	0.0656159	0.0412	ENSDART00000012842	ENSDARG00000017772	1:51486408-51500202	1	Dr.152481	CN171497
BI704438	1.0684	0.125805	0.901327	0.0972281	1.29666	0.077715	0.0412	ENSDART00000083212	ENSDARG00000059680	3:40571229-40584271	1	Dr.78416	DN893083	ZDB-GENE-031009-1	fscn1	fascin homolog 1, actin-bundling protein (Strongylocentrotus purpuratus)	fascin homolog 1, actin-bundling protein (Strongylocentrotus purpuratus)	FSCN1	6624
BI705711	0.971929	0.278624	0.569209	0.0697106	0.935645	0.0867383	0.0412					Dr.81402	AW343644
BI706468	1.09753	0.105378	1.22828	0.0733167	0.992235	0.043363	0.0412	ENSDART00000082151	ENSDARG00000059128	6:3316388-3321853	-1	Dr.126361	BC093342
BI706995	1.12797	0.154992	1.49896	0.130133	0.944107	0.128202	0.0412					Dr.154409	EH597494
BI710147	0.955201	0.0932385	1.00441	0.0587465	0.806287	0.0404106	0.0412	ENSDART00000148232	ENSDARG00000035871	19:34232371-34236195	1	Dr.34631	EB972689	ZDB-GENE-030131-8657	rpl30	ribosomal protein L30	ribosomal protein L30	RPL30	6156
BI840791	1.07947	0.106373	0.947005	0.0825367	1.27779	0.0711049	0.0412					Dr.84559	BI325635
BI840930	0.86851	0.134296	1.06774	0.0899395	0.740394	0.0604359	0.0412	ENSDART00000126401	ENSDARG00000013979	14:24621608-24630997	1	Dr.123715	BI983856
BI842415	0.945213	0.133119	0.602345	0.0760643	1.01311	0.131683	0.0412					Dr.95260	BI842224
BI843305	1.01644	0.0629105	0.979057	0.0675079	1.31143	0.101871	0.0412					Dr.82088	AL908817	ZDB-GENE-060825-41	zgc:153713
BI844162	0.959139	0.0926226	1.60118	0.338837	0.789266	0.0494256	0.0412	ENSDART00000124071	ENSDARG00000088373	19:16829023-16841182	-1	Dr.132061	AI721601
BI846718	0.953611	0.127513	1.00559	0.0974012	0.608851	0.0856289	0.0412
BI863967	1.06898	0.1099	1.36928	0.15409	0.857159	0.0998505	0.0412	ENSDART00000132035	ENSDARG00000012747	8:51202746-51219795	1	Dr.13426	BI863967	ZDB-GENE-040426-1494	rer1	RER1 retention in endoplasmic reticulum 1 homolog (S. cerevisiae)	RER1 retention in endoplasmic reticulum 1 homolog (S. cerevisiae)	RER1	11079
BI865578	0.964172	0.051472	1.07954	0.0876833	0.755302	0.0719211	0.0412	ENSDART00000124874	ENSDARG00000036967	1:42231793-42240269	1	Dr.159623	NM_201502	ZDB-GENE-031201-3	smox	spermine oxidase	spermine oxidase	SMOX	54498
BI865912	0.884894	0.235725	1.28034	0.142526	0.74635	0.118964	0.0412	ENSDART00000062633	ENSDARG00000042690	22:16184655-16188403	-1	Dr.77753	AI588273	ZDB-GENE-001228-2	s1pr1	sphingosine-1-phosphate receptor 1	sphingosine-1-phosphate receptor 1	S1PR1	1901
BI866324	1.04684	0.125778	1.30737	0.0684632	1.00315	0.0711897	0.0412
BI867054	0.97187	0.145355	1.10159	0.0460058	0.707056	0.0877197	0.0412					Dr.76249	BI867054	ZDB-GENE-040426-2883	tfdp1a	transcription factor Dp-1, a	transcription factor Dp-1	TFDP1	7027
BI867378	1.15451	0.157087	1.43668	0.149687	0.879487	0.113872	0.0412	ENSDART00000003670	ENSDARG00000038694	2:36810195-36819618	-1	Dr.13660	EV605737	ZDB-GENE-050320-111	zgc:101744
BI876879	1.0219	0.057552	0.868984	0.0511399	1.11563	0.0727867	0.0412	ENSDART00000110895	ENSDARG00000024209	19:45041044-45059977	-1	Dr.79738	AW281155	ZDB-GENE-040426-865	wasf2	WAS protein family, member 2	WAS protein family, member 2	WASF2	10163
BI878891	1.18705	0.161441	1.43582	0.0959144	1.04727	0.0880446	0.0412	ENSDART00000081754	ENSDARG00000016721	19:7898602-7914269	-1	Dr.122733	BG884479
BI879684	0.990361	0.0574659	1.22172	0.136183	0.624092	0.122979	0.0412
BI880540	0.975828	0.0926274	0.744609	0.0786606	1.09647	0.0805021	0.0412	ENSDART00000122742	ENSDARG00000017780	2:49987900-50017464	1	Dr.12904	BI671066	ZDB-GENE-040724-215	rorcb	RAR-related orphan receptor C b	RAR-related orphan receptor C	RORC	6097
BI880695	1.00182	0.116888	1.24428	0.136035	0.719971	0.10329	0.0412	ENSDART00000108487	ENSDARG00000057414	3:15341408-15351584	1	Dr.75876	AI322224	ZDB-GENE-030131-6577	phb	prohibitin	prohibitin	PHB	5245
BI881145	1.01796	0.0687885	1.36274	0.0568911	0.979957	0.0824795	0.0412	ENSDART00000067478	ENSDARG00000051861	25:22886407-22910736	-1	Dr.93281	BE016254	ZDB-GENE-060512-114	pkp3	plakophilin 3	plakophilin 3	PKP3	11187
BI882014	1.1626	0.164655	0.783762	0.0712422	1.13159	0.10065	0.0412
BI883197	0.970937	0.043255	0.864731	0.147559	1.6939	0.265196	0.0412	ENSDART00000030444	ENSDARG00000028346	5:12929285-12952804	1	Dr.39283	BI883197	ZDB-GENE-040426-2632	tesca	tescalcin a	tescalcin	TESC	54997
BI883872	0.963954	0.0991531	0.785787	0.0420099	1.27493	0.188137	0.0412	ENSDART00000073434	ENSDARG00000045554	25:37040009-37047674	-1	Dr.111296	BI883872	ZDB-GENE-040801-137	mphosph6	M-phase phosphoprotein 6	M-phase phosphoprotein 6	MPHOSPH6	10200
BI885399	0.930868	0.121214	0.65853	0.0647893	1.09802	0.150728	0.0412	ENSDART00000018163	ENSDARG00000005468	18:44769997-44777969	-1	Dr.159864	EB980177
BI885823	0.857396	0.138163	1.14529	0.113662	0.767484	0.0741628	0.0412	ENSDART00000145555	ENSDARG00000038075	6:50333021-50338176	1	Dr.76173	CK713886	ZDB-GENE-031105-2	cyc1	cytochrome c-1	cytochrome c-1	CYC1	1537
BI885907	0.978975	0.0757479	0.855457	0.0408611	1.07384	0.0553653	0.0412	ENSDART00000013076	ENSDARG00000019239	2:50799422-50842251	-1	Dr.76883	EB912469	ZDB-GENE-030131-2603	cul1a	cullin 1a	cullin 1	CUL1	8454
BI886408	1.07833	0.119742	0.835227	0.143565	1.53922	0.167953	0.0412	ENSDART00000127571	ENSDARG00000087793	15:24911640-24919278	-1	Dr.76701	AI385002	ZDB-GENE-030131-2586	wu:fc12d07
BI887399	1.08556	0.0902598	1.58212	0.150525	1.00356	0.0963698	0.0412					Dr.21850	AI884101	ZDB-GENE-040426-688	uso1	USO1 homolog, vesicle docking protein (yeast)	USO1 homolog, vesicle docking protein (yeast)	USO1	8615
BI979304	0.978787	0.0755002	0.576966	0.0946864	1.13835	0.205858	0.0412	ENSDART00000033923	ENSDARG00000026454	5:60690578-60694363	-1	Dr.86043	BI979304	ZDB-GENE-040426-1372	zgc:64116
BI982036	1.10776	0.0942678	0.870099	0.0801045	1.39371	0.185073	0.0412	ENSDART00000021213	ENSDARG00000007753	18:17323066-17362630	1	Dr.132822	BQ074223	ZDB-GENE-030131-7896	cpne2	copine II	copine II	CPNE2	221184
BI985053	0.931272	0.114417	1.08492	0.119823	0.624506	0.0832796	0.0412	ENSDART00000055965	ENSDARG00000038361	3:467140-482012	-1	Dr.14829	BI896455	ZDB-GENE-041010-117	gcdhl	glutaryl-Coenzyme A dehydrogenase, like	glutaryl-Coenzyme A dehydrogenase	GCDH	2639
BM005113	1.03996	0.165706	0.697893	0.0697178	1.20663	0.165209	0.0412					Dr.84823	BM024148	ZDB-GENE-031002-18	syt9a	synaptotagmin IXa	synaptotagmin IX	SYT9	143425
BM023884	0.860922	0.149788	1.04868	0.110303	0.634586	0.0873748	0.0412	ENSDART00000079104	ENSDARG00000056583	19:28766866-28769542	-1	Dr.84954	BM004893	ZDB-GENE-040912-86	ndufs6	NADH dehydrogenase (ubiquinone) Fe-S protein 6	NADH dehydrogenase (ubiquinone) Fe-S protein 6, 13kDa (NADH-coenzyme Q reductase)	NDUFS6	4726
BM037146	0.782877	0.245353	0.992767	0.104694	1.45681	0.102423	0.0412	ENSDART00000149025	ENSDARG00000045437	24:8288604-8305014	-1	Dr.151422	NM_001039995	ZDB-GENE-060312-46	slc35b3	solute carrier family 35, member B3	solute carrier family 35, member B3	SLC35B3	51000
BM095884	1.04886	0.0695267	1.17935	0.0934216	0.892587	0.0471617	0.0412					Dr.17090	BM095884
BM104002	1.04271	0.176716	1.26641	0.134804	0.879473	0.0468198	0.0412	ENSDART00000015374	ENSDARG00000018966	11:25719937-25733234	1	Dr.3433	AI397165	ZDB-GENE-030131-8497	cyb5r1	cytochrome b5 reductase 1	cytochrome b5 reductase 1	CYB5R1	51706
BM104073	1.04289	0.127868	0.736064	0.0657704	1.37922	0.243764	0.0412	ENSDART00000125163	ENSDARG00000091031	23:12561613-12592554	1	Dr.104432	AA542462	ZDB-GENE-030131-6830	si:ch211-153a8.4
BM157063	1.17893	0.189393	1.61423	0.158156	0.928038	0.156074	0.0412	ENSDART00000138236	ENSDARG00000095273	21:27890588-27895098	1	Dr.1141	AL908590	ZDB-GENE-030131-9136	cox8a	cytochrome c oxidase subunit 8a	cytochrome c oxidase subunit VIIIA (ubiquitous)	COX8A	1351
BM181146	0.966152	0.0608261	0.933813	0.0440002	1.19337	0.0792805	0.0412					Dr.55459	BM181159	ZDB-GENE-050208-554	stab1l
BM182177	0.943242	0.0608356	1.2024	0.0595086	0.900171	0.0759341	0.0412	ENSDART00000048256	ENSDARG00000029241	12:5744606-5755325	-1	Dr.20507	BQ616474	ZDB-GENE-050522-222	cep55l
BM182563	0.953674	0.140272	1.54726	0.198277	0.907889	0.130192	0.0412	ENSDART00000145330	ENSDARG00000092170	16:26211419-26213014	1	Dr.159005	CN318194
BM183818	0.923595	0.106707	1.20445	0.0939573	0.866022	0.0718617	0.0412	ENSDART00000128958	ENSDARG00000071018	17:23480399-23503685	-1	Dr.76854	AI793768	ZDB-GENE-030131-3776	ptena	phosphatase and tensin homolog A	phosphatase and tensin homolog (mutated in multiple advanced cancers 1)	PTEN	5728
BM183982	0.916522	0.106109	0.77314	0.067032	1.23632	0.160937	0.0412					Dr.150788	BG303930
BM184708	0.998467	0.125032	1.27489	0.0994068	0.773408	0.109154	0.0412	ENSDART00000104298	ENSDARG00000070824	6:29116793-29123887	1	Dr.76451	EH467498	ZDB-GENE-011010-1	ndufb5	NADH dehydrogenase (ubiquinone) 1 beta subcomplex 5	NADH dehydrogenase (ubiquinone) 1 beta subcomplex, 5, 16kDa	NDUFB5	4711
BM185569	1.02585	0.16952	1.06407	0.126902	0.668217	0.0654001	0.0412	ENSDART00000139507	ENSDARG00000093695	20:32191283-32192688	1	Dr.159907	BM185569	ZDB-GENE-041014-374	si:ch211-51a19.4
BM187353	0.912524	0.141325	0.610133	0.0444804	0.932231	0.113976	0.0412
ENSDART00000021519	0.989089	0.15844	1.51675	0.102926	1.02397	0.112116	0.0412	ENSDART00000148516	ENSDARG00000017522	19:12256146-12470270	-1	Dr.133831	NM_001002873	ZDB-GENE-040720-1	ctdp1	CTD (carboxy-terminal domain, RNA polymerase II, polypeptide A) phosphatase, subunit 1	CTD (carboxy-terminal domain, RNA polymerase II, polypeptide A) phosphatase, subunit 1	CTDP1	9150
AW128211	1.115	0.245093	1.20385	0.210474	0.591085	0.121501	0.0415	ENSDART00000141553	ENSDARG00000037140	23:26313722-26325308	1	Dr.120389	BM103961	ZDB-GENE-030131-5664	pfkfb1	6-phosphofructo-2-kinase/fructose-2,6-biphosphatase 1	6-phosphofructo-2-kinase/fructose-2,6-biphosphatase 1	PFKFB1	5207
BI673998	0.971906	0.0777237	1.09613	0.133208	0.738061	0.0347062	0.0415	ENSDART00000058161	ENSDARG00000039778	13:52105009-52207985	1	Dr.83526	BI673765
BI705116	0.931122	0.0956098	0.740479	0.045899	0.919512	0.0396718	0.0415					Dr.152703	BM025724	ZDB-GENE-070620-12	zgc:165519
BI896395	1.03177	0.17439	1.49521	0.143379	0.930187	0.133361	0.0415	ENSDART00000000070	ENSDARG00000000069	24:22678238-22711533	-1	Dr.78350	AI626458
BI980991	0.969303	0.100997	0.860802	0.0715687	1.16632	0.080718	0.0415	ENSDART00000127791	ENSDARG00000044902	11:23855471-23960266	-1	Dr.160493	CK362140
AF448057	1.14303	0.145275	1.43913	0.145863	0.89985	0.125032	0.0418	ENSDART00000033724	ENSDARG00000023290	19:44586508-44596201	1	Dr.79081	EB923201	ZDB-GENE-030131-7662	dfna5	deafness, autosomal dominant 5	deafness, autosomal dominant 5	DFNA5	1687
AI584445	0.908918	0.195715	0.527121	0.0558004	0.881913	0.138953	0.0418
AW233227	0.981525	0.225501	0.983557	0.12654	1.83136	0.356312	0.0418	ENSDART00000103475	ENSDARG00000070480	19:31646942-31649494	-1	Dr.25277	CN507341	ZDB-GENE-050417-214	agr2	anterior gradient homolog 2 (Xenopus laevis)	anterior gradient homolog 2 (Xenopus laevis)	AGR2	10551
BG727368	1.07318	0.0863523	1.01856	0.070434	1.35894	0.106138	0.0418
BI841076	1.0472	0.140414	1.77133	0.727374	0.577829	0.109472	0.0418	ENSDART00000021317	ENSDARG00000009170	7:67288488-67326081	1	Dr.79011	BI534102	ZDB-GENE-030131-3782	ctr9	Ctr9, Paf1/RNA polymerase II complex component, homolog (S. cerevisiae)	Ctr9, Paf1/RNA polymerase II complex component, homolog (S. cerevisiae)	CTR9	9646
BQ481047	0.995024	0.135662	1.15303	0.0854185	0.780512	0.0927327	0.0418	ENSDART00000129908	ENSDARG00000058688	4:7451260-7478790	-1	Dr.159755	BG727088
Y09668	0.836051	0.212893	0.615095	0.0645962	1.02869	0.161923	0.0418	ENSDART00000011699	ENSDARG00000020482	5:24376604-24386108	-1	Dr.150274	GO941196	ZDB-GENE-030131-713	nono
BI429440	1.09538	0.151965	0.826322	0.0738233	1.12711	0.0739441	0.0421	ENSDART00000078271	ENSDARG00000055874	1:19648162-19692601	-1	Dr.106912	EB957797	ZDB-GENE-090313-68	cpe	carboxypeptidase E	carboxypeptidase E	CPE	1363
BM101531	0.918658	0.125633	1.22863	0.0374923	0.874842	0.0962555	0.0422	ENSDART00000092110	ENSDARG00000063194	10:11293251-11318997	-1	Dr.107672	BM101531	ZDB-GENE-060929-440	lin54	lin-54 homolog	lin-54 homolog (C. elegans)	LIN54	132660
AI958363	0.804388	0.178532	0.990756	0.0950948	0.472335	0.123288	0.0425	ENSDART00000135913	ENSDARG00000094952	3:55613241-55623481	1	Dr.86575	AI958363
AF012751	0.90374	0.175619	0.46746	0.0813294	0.80976	0.0702137	0.0427	ENSDART00000060122	ENSDARG00000025658	15:30653398-30655186	-1	Dr.75771	AF012751	ZDB-GENE-010308-19	or111-2
AA542546	0.976619	0.0371898	1.08887	0.0744484	0.858684	0.0436004	0.0428					Dr.75515	AA542546	ZDB-GENE-030429-35	si:ch211-204c21.1
BG304453	0.996873	0.0597805	1.28611	0.125111	0.826918	0.108638	0.0428	ENSDART00000035940	ENSDARG00000025549	13:33471803-33475288	1	Dr.81793	AW567099	ZDB-GENE-050306-9	ndufaf1	NADH dehydrogenase (ubiquinone) 1 alpha subcomplex, assembly factor 1	NADH dehydrogenase (ubiquinone) 1 alpha subcomplex, assembly factor 1	NDUFAF1	51103
BI981220	0.958947	0.0997354	1.17886	0.0559936	0.91812	0.0700039	0.0428					Dr.16738	BI981220
AW170989	1.05696	0.188464	1.36878	0.187607	0.88777	0.0460785	0.0429	ENSDART00000103950	ENSDARG00000057940	11:18965906-18977621	-1	Dr.123839	BM778032
BG883781	0.84184	0.149959	0.842245	0.0975939	1.32224	0.161797	0.0429	ENSDART00000079716	ENSDARG00000057114	1:12905187-12911525	1	Dr.3508	CO359953	ZDB-GENE-030131-740	zgc:101819
BI475904	0.872051	0.140005	1.25023	0.0907105	0.872703	0.0956289	0.0429	ENSDART00000125936	ENSDARG00000020742	4:756777-762909	-1	Dr.82169	BG308924	ZDB-GENE-051113-256	zgc:123333
BM184314	0.848863	0.157233	1.33864	0.146241	0.910022	0.0824544	0.0429	ENSDART00000103324	ENSDARG00000023104	25:33509617-33722350	1	Dr.123315	BM184314
AI588336	1.07415	0.128599	0.713777	0.0809051	1.25339	0.226062	0.0432					Dr.132385	AI588336
AI722891	0.924267	0.139734	0.90567	0.101101	1.48896	0.224391	0.0432	ENSDART00000074425	ENSDARG00000052550	20:49098508-49102431	-1	Dr.78851	AI722890	ZDB-GENE-050217-3	nkx2.2b	NK2 transcription factor related 2b	NK2 transcription factor related, locus 2 (Drosophila)	NKX2-2	4821
AW116360	0.97548	0.147189	0.985464	0.0841779	0.722825	0.054882	0.0432	ENSDART00000098889	ENSDARG00000054272	18:36685086-36707885	-1	Dr.118673	BQ616303
BI890023	0.824464	0.125014	1.38822	0.227438	0.741772	0.131509	0.0432	ENSDART00000016112	ENSDARG00000013804	15:28465241-28471917	1	Dr.45282	EB881748	ZDB-GENE-030131-5206	capns1b	calpain, small subunit 1 b	calpain, small subunit 1	CAPNS1	826
BM181817	0.975417	0.129389	1.28915	0.0795191	0.92375	0.0966295	0.0432	ENSDART00000030141	ENSDARG00000021702	1:24928736-24945386	-1	Dr.18414	AI384693	ZDB-GENE-040426-1920	pdcd4a	programmed cell death 4a	programmed cell death 4 (neoplastic transformation inhibitor)	PDCD4	27250
AW466556	1.23783	0.442242	0.868951	0.0710536	1.5881	0.330485	0.0433	ENSDART00000036901	ENSDARG00000028543	14:2127697-2166885	1	Dr.78612	AW510211	ZDB-GENE-030131-6305	fbxw11a	F-box and WD-40 domain protein 11a	F-box and WD-40 domain protein 11	FBXW11	23291
BI877937	0.930356	0.0724881	1.39454	0.0676317	0.989039	0.111185	0.0433	ENSDART00000017785	ENSDARG00000003213	14:49053883-49090125	1	Dr.78308	EB881245	ZDB-GENE-030131-2392	naa15a	N(alpha)-acetyltransferase 15, NatA auxiliary subunit a	N(alpha)-acetyltransferase 15, NatA auxiliary subunit	NAA15	80155
BM183855	1.08245	0.118768	0.875978	0.10214	0.550009	0.0725043	0.0433	ENSDART00000045607	ENSDARG00000005446	25:5016485-5038286	1	Dr.75286	CD585935	ZDB-GENE-051120-174	ckap5	cytoskeleton associated protein 5	cytoskeleton associated protein 5	CKAP5	9793
BM186753	1.22175	0.17418	1.50555	0.111612	0.984558	0.135284	0.0433	ENSDART00000075223	ENSDARG00000053217	17:50497328-50509536	-1	Dr.150357	AL719242	ZDB-GENE-050913-48	zgc:114130
BI877623	1.05028	0.122418	1.19785	0.143607	0.818264	0.0522193	0.0442	ENSDART00000076209	ENSDARG00000037928	3:32017254-32029509	-1	Dr.81895	BI877623	ZDB-GENE-050706-53	ddx42	DEAD (Asp-Glu-Ala-Asp) box polypeptide 42	DEAD (Asp-Glu-Ala-Asp) box polypeptide 42	DDX42	11325
AI667214	0.889496	0.111914	0.723167	0.154333	1.46582	0.261846	0.0452
BI880240	1.05071	0.135807	1.26949	0.198798	0.756001	0.0897178	0.0452	ENSDART00000006181	ENSDARG00000004780	14:18747916-18765031	1	Dr.75304	BI879246	ZDB-GENE-030131-6705	si:dkey-102m7.4
BM071131	0.987399	0.0803941	0.99936	0.0579505	0.706408	0.0798553	0.0452					Dr.150087	EH531556
BI879707	1.00041	0.0968927	0.890724	0.0642449	0.65098	0.0607552	0.0453	ENSDART00000105734	ENSDARG00000056511	10:27440226-27444325	1	Dr.82729	EB840268	ZDB-GENE-040718-102	arr3a	arrestin 3a, retinal (X-arrestin)	arrestin 3, retinal (X-arrestin)	ARR3	407
BE017692	0.991269	0.125566	1.17952	0.0891908	0.725537	0.119515	0.0456	ENSDART00000040204	ENSDARG00000031164	1:4291630-4308270	1	Dr.75617	BQ092232	ZDB-GENE-040426-1646	tuba8l2
AF370035	0.972774	0.114056	1.33806	0.150457	0.794156	0.132618	0.0457	ENSDART00000045408	ENSDARG00000031855	6:53310997-53343668	1	Dr.118210	NM_152980	ZDB-GENE-020806-3	mst1	macrophage stimulating 1 (hepatocyte growth factor-like)	macrophage stimulating 1 (hepatocyte growth factor-like)	MST1	4485
AW279879	1.03796	0.0989453	0.861548	0.120519	1.32994	0.0957101	0.0457	ENSDART00000080332	ENSDARG00000057624	24:24324866-24333319	1	Dr.81074	BI428767	ZDB-GENE-040426-1686	cops5	COP9 constitutive photomorphogenic homolog subunit 5	COP9 constitutive photomorphogenic homolog subunit 5 (Arabidopsis)	COPS5	10987
AW420935	1.09517	0.140056	1.01288	0.107864	1.43003	0.0993153	0.0457	ENSDART00000114529	ENSDARG00000078935	9:14388831-14408031	-1	Dr.79733	AW420299	ZDB-GENE-070912-313	ttll4
BG308473	0.987985	0.0658954	0.780792	0.0592723	1.20457	0.173646	0.0461	ENSDART00000040810	ENSDARG00000033182	19:32584703-32587248	-1	Dr.82824	BG308553	ZDB-GENE-030219-167	arl4ab	ADP-ribosylation factor-like 4ab	ADP-ribosylation factor-like 4A	ARL4A	10124
AI959214	0.985792	0.106903	1.11725	0.0662227	0.68674	0.116832	0.0468	ENSDART00000113497	ENSDARG00000078576	6:23480147-23514576	-1
AW171497	0.928892	0.127704	1.32238	0.0880915	0.888722	0.118359	0.0468	ENSDART00000037287	ENSDARG00000091208	16:57691461-57713739	-1	Dr.122259	CD598256
BE017788	0.9099	0.167744	1.11655	0.216678	0.597732	0.086819	0.0468	ENSDART00000084841	ENSDARG00000077573	5:39488268-39500753	-1	Dr.10015	CR928895	ZDB-GENE-090309-2	tmprss13b	transmembrane protease, serine 13b	transmembrane protease, serine 13	TMPRSS13	84000
BI865801	1.10292	0.127553	1.48153	0.115167	1.02473	0.119645	0.0468	ENSDART00000122333	ENSDARG00000008706	1:41846835-41852592	1	Dr.77454	EH559551	ZDB-GENE-040426-1736	zgc:73265
BI563047	1.03908	0.170821	1.44835	0.137397	0.929909	0.131169	0.047	ENSDART00000055186	ENSDARG00000037867	3:40292027-40295976	-1	Dr.78094	CT669657	ZDB-GENE-050309-87	im:7148816
M27153	1.03668	0.0824288	0.953169	0.0543188	0.752965	0.0523356	0.047
M34182-1	1.05375	0.0788558	1.36987	0.10196	0.873138	0.134053	0.047	ENSDART00000122721	ENSDARG00000014134	3:50619997-50664192	-1	Dr.44411	NM_001082840	ZDB-GENE-050114-6	prkacaa	protein kinase, cAMP-dependent, catalytic, alpha, genome duplicate a	protein kinase, cAMP-dependent, catalytic, alpha	PRKACA	5566
X85735	0.927693	0.163927	0.484124	0.0794551	0.899677	0.167171	0.047					Dr.132864	X85735	ZDB-GENE-980526-558	wt1a	wilms tumor 1a	Wilms tumor 1	WT1	7490
BI318816	0.940536	0.0889544	1.05593	0.0593448	0.63886	0.113922	0.0474	ENSDART00000029308	ENSDARG00000028507	8:13623711-13676538	1	Dr.33623	BI982430	ZDB-GENE-030131-7209	itgb4	integrin, beta 4	integrin, beta 4	ITGB4	3691
BF717510	1.00298	0.044033	0.930034	0.0803879	1.25705	0.096661	0.0477	ENSDART00000020122	ENSDARG00000005560	10:16980964-16985015	1	Dr.126590	DN903482
BM184694	1.1693	0.13801	1.18066	0.148036	1.88166	0.250609	0.0477	ENSDART00000050296	ENSDARG00000033175	11:38886328-38891977	1	Dr.117027	BI980245	ZDB-GENE-040426-1112	snrpe	small nuclear ribonucleoprotein polypeptide E	small nuclear ribonucleoprotein polypeptide E	SNRPE	6635
U93458	0.928814	0.0996277	1.40643	0.129504	0.796272	0.15985	0.0477	ENSDART00000040769	ENSDARG00000033172	16:49358592-49391556	1	Dr.126903	CT608440
AI545062	0.975338	0.0475626	1.37433	0.0744904	1.05915	0.0876821	0.0479	ENSDART00000114437	ENSDARG00000076383	16:19677195-19699399	1	Dr.75388	AA495367
AI588285	1.17149	0.160712	0.868346	0.063554	1.32051	0.188537	0.0479
AI793736	1.04194	0.0483691	0.903116	0.0397589	1.14387	0.0886818	0.0479	ENSDART00000078557	ENSDARG00000056127	14:27724742-27728151	1	Dr.143167	EX159141
AW233515	0.957207	0.149589	1.89774	0.192231	1.01976	0.227394	0.0479					Dr.155627	AW279853
BG308920	0.972012	0.0971879	1.87835	0.234324	1.27923	0.0913437	0.0479					Dr.29127	BG308920	ZDB-GENE-060512-59	pold3	polymerase (DNA-directed), delta 3, accessory subunit	polymerase (DNA-directed), delta 3, accessory subunit	POLD3	10714
BI889228	1.0251	0.140493	0.923672	0.0611872	0.724679	0.0466431	0.0484	ENSDART00000138234	ENSDARG00000044636	11:45483492-45493262	-1	Dr.75578	EB830177	ZDB-GENE-040718-451	tomm20b	translocase of outer mitochondrial membrane 20 homolog b (yeast)	translocase of outer mitochondrial membrane 20 homolog (yeast)	TOMM20	9804
BI980180	0.955642	0.195662	1.25648	0.0608688	0.808369	0.126743	0.0484	ENSDART00000027242	ENSDARG00000017168	10:45299270-45310337	1	Dr.86046	CD282658	ZDB-GENE-040426-1438	nr2f1b	nuclear receptor subfamily 2, group F, member 1b	nuclear receptor subfamily 2, group F, member 1	NR2F1	7025
AI964241	0.989646	0.0919235	1.22356	0.224903	0.713971	0.0644554	0.0488	ENSDART00000131019	ENSDARG00000016687	7:21456063-21491112	1	Dr.3523	BM280072	ZDB-GENE-030131-899	acadvl	acyl-Coenzyme A dehydrogenase, very long chain	acyl-Coenzyme A dehydrogenase, very long chain	ACADVL	37
BI473490	1.07979	0.0839521	1.12393	0.1006	0.847383	0.0496051	0.0488	ENSDART00000139048	ENSDARG00000040705	9:42386742-42424366	-1	Dr.107681	BG799594	ZDB-GENE-030616-550	glsb	glutaminase b	glutaminase	GLS	2744
BI709791	0.940719	0.0802487	0.752484	0.0224687	0.924866	0.0649058	0.0491	ENSDART00000130229	ENSDARG00000090219	10:44127556-44141232	-1	Dr.79570	BM103285	ZDB-GENE-040426-990	wdr45
BI428467	0.979193	0.169984	1.45653	0.154716	0.895313	0.144988	0.0493	ENSDART00000033494	ENSDARG00000029072	24:4219347-4226592	-1	Dr.77265	EB908501	ZDB-GENE-021115-9	copeb	core promoter element binding protein	Kruppel-like factor 6	KLF6	1316
AF285098	1.01654	0.148111	1.43811	0.104176	0.617793	0.214524	0.0494	ENSDART00000018837	ENSDARG00000005039	4:29632402-29639074	1	Dr.46820	EB831030	ZDB-GENE-020806-4	gstp1	glutathione S-transferase pi	glutathione S-transferase pi	GSTP1	2950
BI879965	0.955247	0.0778457	1.14734	0.0624539	0.889065	0.0732883	0.0494	ENSDART00000103153	ENSDARG00000070355	Zv9_NA732:107871-114031	1	Dr.14226	EB830426	ZDB-GENE-080204-124	zgc:175088
BI880731	0.942049	0.0893337	0.994585	0.0526751	1.27114	0.100461	0.0494	ENSDART00000130072	ENSDARG00000007523	4:21360143-21408343	-1	Dr.79417	EH469362	ZDB-GENE-030131-4120	mll5	myeloid/lymphoid or mixed-lineage leukemia 5 (trithorax homolog, Drosophila)	myeloid/lymphoid or mixed-lineage leukemia 5 (trithorax homolog, Drosophila)	MLL5	55904
BM082412	1.02253	0.0818948	1.17142	0.0503	0.804474	0.107151	0.0494	ENSDART00000001830	ENSDARG00000001578	13:24802998-24806126	1	Dr.81180	BM082412	ZDB-GENE-030616-617	echs1	enoyl Coenzyme A hydratase, short chain, 1, mitochondrial	enoyl Coenzyme A hydratase, short chain, 1, mitochondrial	ECHS1	1892
X97332	0.991829	0.130355	0.909213	0.174252	1.80457	0.382063	0.0494	ENSDART00000104206	ENSDARG00000056729	23:21763345-21765164	-1	Dr.121752	EB859616	ZDB-GENE-081030-7	her4.3
BI891704	1.17265	0.26498	1.19904	0.231564	0.676716	0.0792585	0.0503	ENSDART00000087120	ENSDARG00000006200	2:16535478-16574920	-1	Dr.72337	EV605796	ZDB-GENE-070112-702	zgc:158450
AI384392	1.02457	0.15627	0.715233	0.0665204	1.04686	0.125619	0.0504					Dr.115460	EH533516	ZDB-GENE-080610-1	p4hb	procollagen-proline, 2-oxoglutarate 4-dioxygenase (proline 4-hydroxylase), beta polypeptide	procollagen-proline, 2-oxoglutarate 4-dioxygenase (proline 4-hydroxylase), beta polypeptide	P4HB	5034
AF231127	1.02126	0.0411071	1.0598	0.106731	0.764006	0.0611223	0.0507	ENSDART00000000070	ENSDARG00000000069	24:22678238-22711533	-1	Dr.75963	AW566560	ZDB-GENE-000511-3	dap	death associated protein	death-associated protein	DAP	1611
AW420704	1.17239	0.174523	1.05479	0.0696207	0.838088	0.0520721	0.0509	ENSDART00000018827	ENSDARG00000003142	1:29641397-29745261	-1	Dr.67104	FP120957	ZDB-GENE-020402-5	dachc
AB037940	1.18767	0.292642	0.659531	0.053888	1.02781	0.161024	0.0514	ENSDART00000045385	ENSDARG00000030347	7:16082277-16085567	1	Dr.81260	BC163806	ZDB-GENE-000406-9	mespba	mesoderm posterior ba	mesoderm posterior 1	MESP1	55897
AF359424	0.893759	0.111199	1.38111	0.152457	0.694639	0.184109	0.0514	ENSDART00000146094	ENSDARG00000043133	15:2642061-2643914	-1	Dr.159463	NM_131766	ZDB-GENE-010328-6	cldnf
AI545080	0.961722	0.196314	1.41364	0.152167	0.823676	0.158611	0.0514	ENSDART00000066833	ENSDARG00000045442	24:4835882-4845404	-1	Dr.141299	CO959307	ZDB-GENE-040801-8	zgc:92237
AW019276	0.993564	0.0727638	1.18037	0.0536338	0.837573	0.102978	0.0514	ENSDART00000031047	ENSDARG00000025147	23:32304747-32324518	1	Dr.76749	EB770509	ZDB-GENE-030131-180	cd63	Cd63 antigen	CD63 antigen (melanoma 1 antigen)	CD63	967
AW343823	0.958406	0.0832321	0.843504	0.0278384	1.11846	0.11252	0.0514	ENSDART00000124510	ENSDARG00000011932	23:9916526-9970412	-1	Dr.2562	AI588332	ZDB-GENE-030131-2199	prkcbp1l
BI886794	1.13571	0.192983	0.662745	0.0290057	1.00944	0.15538	0.0514	ENSDART00000125555	ENSDARG00000042530	18:11684774-11719398	-1	Dr.31864	CK685208	ZDB-GENE-040715-8	nup205	nucleoporin 205	nucleoporin 205kDa	NUP205	23165
BI886817	1.01775	0.0981165	1.53205	0.374688	0.783707	0.0809269	0.0514	ENSDART00000057948	ENSDARG00000077383	13:16328901-16375450	1	Dr.77310	EB981323	ZDB-GENE-030707-4	anxa11a	annexin A11a	annexin A11	ANXA11	311
BI890189	0.960937	0.144273	1.03299	0.147678	0.677259	0.0553253	0.0514	ENSDART00000062366	ENSDARG00000042534	5:70272375-70289177	-1	Dr.32248	AI667414	ZDB-GENE-040426-2457	rsrc2	arginine/serine-rich coiled-coil 2	arginine/serine-rich coiled-coil 2	RSRC2	65117
BI980786	1.00204	0.0584797	1.19647	0.0607286	0.907385	0.0863511	0.0514	ENSDART00000131295	ENSDARG00000020527	14:10823540-10854840	1	Dr.104735	AI384234	ZDB-GENE-030131-8491	zgc:172056
BM071298	0.953845	0.123143	1.41133	0.0763666	0.956278	0.134404	0.0514	ENSDART00000015517	ENSDARG00000005220	24:12531618-12591540	-1	Dr.84415	EH463483	ZDB-GENE-040426-1307	pdcd6	programmed cell death 6	programmed cell death 6	PDCD6	10016
AI793968	1.00626	0.0742386	0.653183	0.0256708	0.948916	0.129112	0.0515	ENSDART00000049437	ENSDARG00000019383	20:18464020-18607662	-1	Dr.124852	AW420750
BI865978	1.03143	0.0768067	1.13892	0.0320481	0.832704	0.09432	0.0515					Dr.133367	BI865818
AI721479	0.846982	0.107881	0.536066	0.0756682	1.13061	0.327458	0.0516	ENSDART00000024104	ENSDARG00000006837	20:33333327-33338265	1	Dr.75499	AI477486	ZDB-GENE-020711-1	mycn	v-myc myelocytomatosis viral related oncogene, neuroblastoma derived (avian)	v-myc myelocytomatosis viral related oncogene, neuroblastoma derived (avian)	MYCN	4613
BM036676	0.950107	0.141137	1.45911	0.206604	0.791574	0.164472	0.0526					Dr.84873	BM316563
AF163311	0.99539	0.0571875	0.744245	0.0682977	1.00917	0.0830281	0.0529	ENSDART00000144318	ENSDARG00000004932	22:41869274-41959133	1	Dr.80861	EB768996	ZDB-GENE-000201-13	kal1b	Kallmann syndrome 1b sequence	Kallmann syndrome 1 sequence	KAL1	3730
AI106503	1.01567	0.0555142	0.938292	0.0441263	0.759916	0.0531517	0.0529	ENSDART00000060166	ENSDARG00000041068	18:20959432-20969479	-1	Dr.17618	BG307496	ZDB-GENE-040426-2703	got2a	glutamic-oxaloacetic transaminase 2a, mitochondrial (aspartate aminotransferase 2)	glutamic-oxaloacetic transaminase 2, mitochondrial (aspartate aminotransferase 2)	GOT2	2806
AI964318	0.997874	0.0996906	1.09053	0.157435	0.712957	0.0634617	0.0529	ENSDART00000078266	ENSDARG00000055868	12:20480934-20490249	1	Dr.105686	BG883551
AI965244	0.975431	0.107284	0.917263	0.105734	0.643413	0.0530043	0.0529	ENSDART00000112417	ENSDARG00000078497	11:3195071-3229802	1	Dr.57903	EB970854	ZDB-GENE-030131-8978	timeless
BI889549	0.975192	0.13917	1.09575	0.0714119	1.59543	0.214437	0.0529	ENSDART00000067086	ENSDARG00000045620	1:11631992-11640923	1	Dr.77320	CB365375	ZDB-GENE-030131-1500	nans	N-acetylneuraminic acid synthase	N-acetylneuraminic acid synthase	NANS	54187
BI892110	1.03781	0.0830106	1.26279	0.214039	0.768583	0.0834173	0.0529					Dr.160072	AL718979
AW018983	1.07192	0.143839	1.17359	0.168138	0.773157	0.0699761	0.0562	ENSDART00000089747	ENSDARG00000062237	11:25281984-25289624	1	Dr.76545	EE213024	ZDB-GENE-060405-1	nfs1	NFS1 nitrogen fixation 1 (S. cerevisiae)	NFS1 nitrogen fixation 1 (S. cerevisiae)	NFS1	9054
BG308696	1.03453	0.153751	1.18856	0.187248	0.749254	0.0632035	0.0565	ENSDART00000114855	ENSDARG00000095242	2:59673089-59676041	-1	Dr.82790	EH531908	ZDB-GENE-040426-1672	ndufa13	NADH dehydrogenase (ubiquinone) 1 alpha subcomplex, 13	NADH dehydrogenase (ubiquinone) 1 alpha subcomplex, 13	NDUFA13	51079
BM035967	1.04036	0.0854813	1.50891	0.343927	0.827647	0.0648743	0.0568	ENSDART00000145178	ENSDARG00000015557	21:28144114-28167035	1	Dr.9484	DN892802	ZDB-GENE-040801-54	zgc:100829
BM181830	0.95701	0.176364	1.14786	0.154842	1.7511	0.197932	0.0568					Dr.76618	AI397236	ZDB-GENE-030131-218	wu:fb17e10
BG303480	1.05573	0.108061	1.63692	0.180665	1.10232	0.13687	0.0574	ENSDART00000052080	ENSDARG00000035870	19:34240041-34264222	-1	Dr.79940	EE204455	ZDB-GENE-030616-616	laptm4b	lysosomal associated protein transmembrane 4 beta	lysosomal protein transmembrane 4 beta	LAPTM4B	55353
BI890094	1.04519	0.0752063	1.10631	0.0985402	1.53543	0.159386	0.0575	ENSDART00000122175	ENSDARG00000011247	24:29859041-29889511	1	Dr.79649	AW566862	ZDB-GENE-060312-35	rnpc3	RNA-binding region (RNP1, RRM) containing 3	RNA-binding region (RNP1, RRM) containing 3	RNPC3	55599
BM024762	0.923326	0.117015	1.63083	0.25771	0.937144	0.168218	0.0575	ENSDART00000040328	ENSDARG00000029406	5:32173724-32174335	-1	Dr.114938	AL908033	ZDB-GENE-040426-987	h2afx	H2A histone family, member X	H2A histone family, member X	H2AFX	3014
BM155683	0.90068	0.0871131	1.18388	0.0776533	0.700212	0.138257	0.0579					Dr.78065	BQ617825	ZDB-GENE-070705-529	si:dkeyp-110c7.1
BI884752	0.867715	0.146957	1.4176	0.158848	1.00561	0.0884988	0.0581	ENSDART00000149633	ENSDARG00000023190	15:1602055-1606899	-1	Dr.75173	CD588524	ZDB-GENE-030131-5584	kpna4	karyopherin alpha 4 (importin alpha 3)	karyopherin alpha 4 (importin alpha 3)	KPNA4	3840
AW184334	0.983057	0.0884933	0.726251	0.0506419	0.975416	0.0985172	0.0586					Dr.80783	EB778338
AW777460	0.964957	0.0452065	0.866216	0.093427	1.17984	0.0760466	0.0592					Dr.75351	BI883321
BI709813	1.03237	0.0734915	1.31856	0.047853	1.00353	0.102726	0.0592	ENSDART00000143438	ENSDARG00000094407	19:28075000-28091405	-1	Dr.86007	EX156247	ZDB-GENE-060503-559	si:dkeyp-46h3.1
BE556955	0.902184	0.116873	1.31414	0.110753	0.941311	0.106325	0.0599	ENSDART00000146996	ENSDARG00000077871	8:42620135-42636879	-1	Dr.122572	BE556955	ZDB-GENE-030131-4497	si:ch211-87l2.1
AI558502	0.975016	0.056794	0.944536	0.098063	1.29199	0.102967	0.0602	ENSDART00000077496	ENSDARG00000044669	11:38778051-38795065	1	Dr.121739	AI544971	ZDB-GENE-060810-79	hp1bp3	heterochromatin protein 1, binding protein 3	heterochromatin protein 1, binding protein 3	HP1BP3	50809
BM095435	1.09552	0.103567	1.05993	0.140653	1.61764	0.199201	0.0603	ENSDART00000020505	ENSDARG00000015471	6:36792721-36826108	1	Dr.84280	BM095435	ZDB-GENE-040426-892	chd1l
AW595239	0.990215	0.0424824	0.894956	0.0859404	0.654618	0.0606596	0.0618	ENSDART00000125739	ENSDARG00000070217	23:39889893-40047376	-1	Dr.76088	CO359328	ZDB-GENE-060825-325	minos1	mitochondrial inner membrane organizing system 1	mitochondrial inner membrane organizing system 1	MINOS1	440574
BG302753	1.093	0.104231	0.663835	0.0703307	0.928146	0.0892392	0.0618	ENSDART00000142128	ENSDARG00000013079	12:9938229-9972460	1	Dr.77414	AI545473	ZDB-GENE-031118-150	tubgcp2	tubulin, gamma complex associated protein 2	tubulin, gamma complex associated protein 2	TUBGCP2	10844
BI980610	1.00138	0.141032	1.70309	0.238492	0.916079	0.219947	0.0618	ENSDART00000081663	ENSDARG00000058734	2:5749025-5758079	-1	Dr.81710	BI980131	ZDB-GENE-050320-35	prdx1
BM155325	1.05723	0.114054	0.893944	0.142667	0.565578	0.0639233	0.0618	ENSDART00000110202	ENSDARG00000079713	10:2696069-2698291	1	Dr.112968	NM_001128268
AI588172	0.972486	0.100959	1.80993	0.315319	1.05339	0.166117	0.0635					Dr.208	AI588172	ZDB-GENE-021115-1	slc11a2	solute carrier family 11 (proton-coupled divalent metal ion transporters), member 2	solute carrier family 11 (proton-coupled divalent metal ion transporters), member 2	SLC11A2	4891
BI704944	1.04292	0.0582753	1.08671	0.0604181	1.35101	0.100418	0.0641	ENSDART00000080286	ENSDARG00000057590	22:15791243-15839279	-1	Dr.81922	BM858879
BI325778	0.972003	0.0859948	1.41544	0.125536	1.02426	0.112541	0.0668	ENSDART00000060694	ENSDARG00000041400	16:6973604-6977199	-1	Dr.81865	EB862877	ZDB-GENE-040801-18	zgc:100908
AI584903	0.980738	0.0563821	0.974829	0.0747425	0.785254	0.0391089	0.0676	ENSDART00000008854	ENSDARG00000021343	15:30459335-30474876	-1	Dr.33037	AI584903	ZDB-GENE-030131-1946	wsb1	WD repeat and SOCS box-containing 1	WD repeat and SOCS box-containing 1	WSB1	26118
AI964296	1.00854	0.0567154	1.33704	0.0709743	0.917364	0.138179	0.0678	ENSDART00000032498	ENSDARG00000024540	8:30574662-30582993	1	Dr.77360	AI588501	ZDB-GENE-040718-248	zgc:100919
BI878750	1.05828	0.219764	1.03753	0.184956	0.650631	0.0609014	0.0682	ENSDART00000078310	ENSDARG00000055901	16:29965247-29977398	-1	Dr.76505	BG302860	ZDB-GENE-070424-244	steap4	STEAP family member 4	STEAP family member 4	STEAP4	79689
BI879430	0.988793	0.0983273	1.40971	0.110264	0.793717	0.19451	0.0682	ENSDART00000139083	ENSDARG00000035798	19:41817433-41819885	1	Dr.142139	BI706840
BI983233	1.00092	0.0847241	1.01058	0.151263	0.643899	0.0865457	0.0682	ENSDART00000100254	ENSDARG00000069090	7:36541049-36549613	1	Dr.77332	BI884139	ZDB-GENE-030131-1531	atp6v0d1	ATPase, H+ transporting, V0 subunit D isoform 1	ATPase, H transporting, lysosomal 38kDa, V0 subunit d isoform 1	ATP6V0D1	9114
AW058850	0.997804	0.170359	1.58643	0.152843	1.08478	0.151357	0.0705	ENSDART00000032212	ENSDARG00000027807	20:460751-504156	-1
AW231998	1.55197	0.480792	1.31338	0.273823	0.781952	0.0646492	0.0705					Dr.155558	AW165065	ZDB-GENE-030131-4831	stk40	serine/threonine kinase 40	serine/threonine kinase 40	STK40	83931
AI964204	1.35317	0.25913	1.26727	0.302823	2.2675	0.214361	0.0712	ENSDART00000007744	ENSDARG00000005463	20:13808897-13828564	1	Dr.79763	CT694733	ZDB-GENE-040426-1840	slc30a1a	solute carrier family 30 (zinc transporter), member 1a	solute carrier family 30 (zinc transporter), member 1	SLC30A1	7779
AW777212	1.13553	0.283903	1.2215	0.293425	0.676416	0.0759712	0.0712	ENSDART00000082119	ENSDARG00000002303	4:358092-383176	1	Dr.146713	CT734700
BI671284	1.0121	0.128774	1.83241	0.28245	1.09	0.199769	0.0712	ENSDART00000063135	ENSDARG00000043003	22:11706582-11725123	-1	Dr.130719	EE208417
BE693197	0.994803	0.0377381	1.29238	0.0834044	0.998936	0.0942367	0.0729	ENSDART00000034124	ENSDARG00000018602	19:21190757-21204665	1	Dr.123609	CT731140
BM101643	1.08844	0.143954	0.611262	0.0537975	1.0257	0.224489	0.0729	ENSDART00000112750	ENSDARG00000077461	12:45877488-45923665	1	Dr.150890	BI867639
AW154483	1.05224	0.0741738	1.48535	0.0942075	1.05629	0.144039	0.0733	ENSDART00000018500	ENSDARG00000034293	20:20398988-20427737	-1	Dr.75612	AW420876	ZDB-GENE-040426-706	hif1ab	hypoxia-inducible factor 1, alpha subunit (basic helix-loop-helix transcription factor) b	hypoxia-inducible factor 1, alpha subunit (basic helix-loop-helix transcription factor)	HIF1A	3091
BI879576	1.04285	0.116279	0.934121	0.0597128	0.758479	0.0511221	0.0733					Dr.12788	AA605772	ZDB-GENE-030131-5231	wu:fa19b12
AI353364	0.950831	0.0773675	1.39989	0.0872572	0.992589	0.138617	0.0759	ENSDART00000020824	ENSDARG00000010098	12:18020367-18031792	1	Dr.76490	AI477252	ZDB-GENE-070209-259	pank1b	pantothenate kinase 1b	pantothenate kinase 1	PANK1	53354
BG892015	1.14241	0.14781	1.8386	0.14007	1.35263	0.156927	0.076					Dr.43999	BG892015	ZDB-GENE-071009-2	cgnl1	cingulin-like 1	cingulin-like 1	CGNL1	84952
AW510092	0.984961	0.119201	1.24882	0.114925	1.88542	0.31047	0.0762					Dr.121613	AI331847
AF165817	1.07544	0.147016	0.675465	0.0767717	1.0006	0.141922	0.0765	ENSDART00000051361	ENSDARG00000012944	5:33844138-33855190	1	Dr.132846	CO933584	ZDB-GENE-030131-8061	si:dkey-175g6.2
BF717352	0.941182	0.119733	0.977343	0.153002	1.46219	0.13228	0.0765	ENSDART00000080740	ENSDARG00000057973	15:25245308-25423857	-1	Dr.116618	EB870480	ZDB-GENE-050417-411	dph1	DPH1 homolog (S. cerevisiae)	DPH1 homolog (S. cerevisiae)	DPH1	1801
AB030902	1.01907	0.073577	1.3431	0.0893962	0.992403	0.118297	0.0769	ENSDART00000103746	ENSDARG00000070573	3:26812726-26823133	1	Dr.75913	AL906721	ZDB-GENE-040121-1	mapk3	mitogen-activated protein kinase 3	mitogen-activated protein kinase 3	MAPK3	5595
BI672347	1.03684	0.0955549	2.02344	0.158692	0.948797	0.357143	0.0769	ENSDART00000063775	ENSDARG00000043442	11:31506364-31509702	-1	Dr.76364	EH444695	ZDB-GENE-061027-365	zgc:153665
AW202619	0.994193	0.1603	0.65318	0.0641527	0.994561	0.168198	0.0786					Dr.80828	AW184758	ZDB-GENE-030131-7470	wu:fj19g03
BI888475	1.16137	0.171796	0.977522	0.120779	0.696274	0.066689	0.0801	ENSDART00000147062	ENSDARG00000074346	16:28774794-28778926	-1	Dr.79759	BI888475
AI584349	1.02786	0.0786824	0.79728	0.0480467	1.11693	0.157191	0.0804	ENSDART00000129489	ENSDARG00000070643	1:572580-658993	1	Dr.77580	AI584349	ZDB-GENE-030131-1928	zgc:65781
BG727565	0.943574	0.117987	0.947266	0.116786	1.30896	0.0885873	0.0804	ENSDART00000010286	ENSDARG00000017316	13:15716254-15747560	-1	Dr.78680	AI721296	ZDB-GENE-050913-58	bag5	BCL2-associated athanogene 5	BCL2-associated athanogene 5	BAG5	9529
BI866976	0.944465	0.103334	1.35458	0.085735	1.04121	0.106585	0.0804	ENSDART00000067117	ENSDARG00000041875	11:2394479-2407613	1	Dr.132817	BQ618225	ZDB-GENE-051030-102	zgc:123326
BQ074959	0.964199	0.243187	0.533093	0.0401826	0.817934	0.151911	0.0834	ENSDART00000058562	ENSDARG00000040041	24:37031305-37056307	-1	Dr.76603	EB794742	ZDB-GENE-030131-9544	mcm4	MCM4 minichromosome maintenance deficient 4, mitotin (S. cerevisiae)	MCM4 minichromosome maintenance deficient 4 (S. cerevisiae)	MCM4	4173
BI427813	0.976946	0.0900893	0.843554	0.0485924	0.604727	0.0854107	0.0835	ENSDART00000147578	ENSDARG00000063076	22:10663878-10669122	1	Dr.81913	AW778336	ZDB-GENE-050208-331	atrip	ATR interacting protein	ATR interacting protein	ATRIP	84126
AW281287	1.0405	0.0859713	0.943906	0.0686755	0.723728	0.0732577	0.085	ENSDART00000134268	ENSDARG00000054191	21:36773017-36779457	1	Dr.76033	EH449840	ZDB-GENE-040426-2711	pgk1	phosphoglycerate kinase 1	phosphoglycerate kinase 1	PGK1	5230
BI705677	1.10517	0.113062	0.798115	0.065335	1.05517	0.108917	0.085	ENSDART00000005847	ENSDARG00000005476	4:19748590-19923254	1	Dr.75272	EH604993	ZDB-GENE-021205-1	nav3	neuron navigator 3	neuron navigator 3	NAV3	89795
BI887176	1.04772	0.0528956	1.41427	0.100223	1.16056	0.0680294	0.085	ENSDART00000149057	ENSDARG00000008680	19:49797067-49809511	-1	Dr.77142	EB935146	ZDB-GENE-030131-2579	kpnb1	karyopherin (importin) beta 1	karyopherin (importin) beta 1	KPNB1	3837
BI879019	0.971203	0.139778	1.36401	0.103427	1.97748	0.311559	0.0854	ENSDART00000122116	ENSDARG00000031600	20:13890757-13914838	1
AF108820	0.99002	0.0993539	0.655267	0.0514935	0.88893	0.107424	0.0859	ENSDART00000126421	ENSDARG00000068407	18:35577685-35580916	-1	Dr.155298	NM_001130608	ZDB-GENE-990621-11	six9
BI896724	0.805978	0.108769	0.576581	0.0465489	0.980909	0.244111	0.0886	ENSDART00000012120	ENSDARG00000004094	8:20704420-20728430	1	Dr.107097	CD585884	ZDB-GENE-030131-7099	acsbg2	acyl-CoA synthetase bubblegum family member 2	acyl-CoA synthetase bubblegum family member 2	ACSBG2	81616
BI318080	0.96341	0.0905404	1.40955	0.147452	1.02312	0.116405	0.0891	ENSDART00000121859	ENSDARG00000090063	25:13991020-14046662	-1	Dr.82571	BI883917
BI877859	0.933049	0.0860254	0.664863	0.0266468	0.814634	0.0694913	0.0895	ENSDART00000129729	ENSDARG00000074297	13:41038672-41058222	1	Dr.159586	CV481913	ZDB-GENE-040426-2125	slc25a28	solute carrier family 25, member 28	solute carrier family 25, member 28	SLC25A28	81894
BM186095	1.00728	0.127425	1.66152	0.0864583	1.06585	0.219482	0.0907	ENSDART00000109434	ENSDARG00000077549	13:6974469-6990691	-1	Dr.104697	EB873971	ZDB-GENE-050506-76	aifm2	apoptosis-inducing factor, mitochondrion-associated, 2	apoptosis-inducing factor, mitochondrion-associated, 2	AIFM2	84883
AI959512	1.02589	0.0831885	0.957253	0.0951894	0.742728	0.0516835	0.0935	ENSDART00000112167	ENSDARG00000075323	19:29778946-29786543	-1	Dr.150460	BC165299	ZDB-GENE-040426-1991	zgc:56062
BG303681	0.907799	0.172534	1.13647	0.111331	1.48071	0.122163	0.0935	ENSDART00000087576	ENSDARG00000061414	22:27421884-27441486	1
BI887062	1.0039	0.0583772	0.657538	0.0907572	0.92892	0.0873087	0.0935	ENSDART00000139490	ENSDARG00000059973	13:49372342-49380033	1	Dr.15421	AW420595	ZDB-GENE-061103-70	fbxo11a	F-box protein 11a	F-box protein 11	FBXO11	80204
BI897414	0.946909	0.0977856	0.955495	0.131042	0.690323	0.0475768	0.0935	ENSDART00000010081	ENSDARG00000009250	16:53740847-53755293	-1	Dr.76250	CK695787	ZDB-GENE-040426-1931	etfb	electron-transfer-flavoprotein, beta polypeptide	electron-transfer-flavoprotein, beta polypeptide	ETFB	2109
AI415831	0.990957	0.0766328	1.5342	0.140091	1.06251	0.16786	0.0971	ENSDART00000025691	ENSDARG00000008170	10:43723551-43737936	1	Dr.76820	AI415831	ZDB-GENE-040704-42	dbnla	drebrin-like a	drebrin-like	DBNL	28988
BI889151	1.10358	0.105589	1.58793	0.0616835	1.18312	0.15826	0.0971	ENSDART00000034536	ENSDARG00000026712	3:17259487-17295765	1	Dr.152484	CN173627
BG729245	0.903005	0.118936	0.983463	0.152347	1.40819	0.108851	0.0975					Dr.132201	AI522396	ZDB-GENE-990415-114	hoxc8a	homeo box C8a	homeo box C8	HOXC8	3224

## Sheet: S2D_Int_ContVsExc
Systematic ID	Control		Deficiency		Excess		t-test	ENSEMBL				NBCI		ZFIN			Human Orthologues
	Normalized	SE	Normalized	SE	Normalized	SE	p	Transcript	Gene	map	sense	Unigene	gb	ID	Symbol	Description	Description	Symbol	Entrez Gene ID
AW184187	1.01997	0.202801	0.735318	0.193263	8.03595	2.20217	0.00187	ENSDART00000061007	ENSDARG00000041623	18:17193795-17195147	1	Dr.121290	BQ261526	ZDB-GENE-030131-4174	mt2
AF095747	1.0434	0.194116	1.97291	0.618736	3.10826	0.895157	0.0372	ENSDART00000056420	ENSDARG00000038643	8:21891896-21907046	1	Dr.8180	BI563253	ZDB-GENE-001229-1	alas2	aminolevulinate, delta-, synthetase 2	aminolevulinate, delta-, synthase 2 (sideroblastic/hypochromic anemia)	ALAS2	212
AF210647	1.00538	0.0757973	0.862872	0.103742	0.664339	0.0555219	0.0372	ENSDART00000134744	ENSDARG00000002344	14:5867664-5870968	1	Dr.160016	BI981461
AF309556	0.943929	0.162744	1.54454	0.390928	2.16502	0.448176	0.0372	ENSDART00000023278	ENSDARG00000019532	25:4189905-4205135	-1	Dr.75661	EB875899	ZDB-GENE-011212-1	fads2	fatty acid desaturase 2	fatty acid desaturase 2	FADS2	9415
AF448140	0.983461	0.161246	1.43946	0.134405	2.07272	0.327426	0.0372	ENSDART00000102459	ENSDARG00000070038	15:5697322-5708818	-1	Dr.77311	EB875301	ZDB-GENE-020320-2	rbp2a	retinol binding protein 2a, cellular	retinol binding protein 2, cellular	RBP2	5948
AI106503	1.03964	0.0776644	1.40459	0.0502658	1.5502	0.124327	0.0372	ENSDART00000060166	ENSDARG00000041068	18:20959432-20969479	-1	Dr.17618	BG307496	ZDB-GENE-040426-2703	got2a	glutamic-oxaloacetic transaminase 2a, mitochondrial (aspartate aminotransferase 2)	glutamic-oxaloacetic transaminase 2, mitochondrial (aspartate aminotransferase 2)	GOT2	2806
AI497477	0.950265	0.111527	1.47459	0.252727	2.43245	0.454091	0.0372	ENSDART00000139070	ENSDARG00000093619	22:15482360-15487773	1	Dr.36001	AI497477	ZDB-GENE-030131-1135	sult3st2
AI545551	0.96901	0.0845378	0.633543	0.0522482	0.554318	0.0737549	0.0372					Dr.132338	AI545551
AI942954	0.915699	0.0445211	0.811349	0.0695477	0.553349	0.0673993	0.0372	ENSDART00000019989	ENSDARG00000011055	13:2206942-2220565	-1	Dr.79462	CD606203	ZDB-GENE-030131-4194	fbxo9	F-box protein 9	F-box protein 9	FBXO9	26268
AI943028	1.29549	0.176226	0.753629	0.11663	0.7321	0.0841362	0.0372	ENSDART00000099601	ENSDARG00000068784	13:43794016-43812184	-1	Dr.5356	AI397361	ZDB-GENE-060929-716	zgc:153073
AI957816	0.926199	0.0969375	0.994428	0.137971	1.39014	0.069893	0.0372	ENSDART00000082000	ENSDARG00000059002	3:6505142-6523755	-1	Dr.76672	AI794298	ZDB-GENE-030131-212	evplb	envoplakin b	envoplakin	EVPL	2125
AI964223	0.8407	0.199131	1.48432	0.251013	2.06756	0.339455	0.0372	ENSDART00000123090	ENSDARG00000086370	19:11954418-11958954	-1	Dr.77157	EB877764	ZDB-GENE-010724-18	apoea	apolipoprotein Ea	apolipoprotein E	APOE	348
AW018470	1.01094	0.199046	1.75299	0.160228	3.08829	0.525331	0.0372	ENSDART00000064003	ENSDARG00000043584	17:23437022-23439037	-1	Dr.92648	CO914517
AW077190	1.01431	0.0425719	0.933672	0.0713584	0.72161	0.0625918	0.0372					Dr.160301	CT611242
AW173992	0.936563	0.105505	1.43111	0.144527	1.70273	0.217226	0.0372	ENSDART00000016658	ENSDARG00000014572	4:16775192-16793192	-1	Dr.75843	EB877737	ZDB-GENE-030131-1325	chpt1	choline phosphotransferase 1	choline phosphotransferase 1	CHPT1	56994
AW279802	1.0291	0.0566775	0.850657	0.0909169	0.696565	0.0685129	0.0372	ENSDART00000110365	ENSDARG00000077145	16:3116582-3162003	-1	Dr.150696	AW279802
AW280411	0.963969	0.0631564	1.32278	0.142149	1.33531	0.0817661	0.0372	ENSDART00000146322	ENSDARG00000063141	22:12495876-12520643	1	Dr.155624	AW281112	ZDB-GENE-030131-7119	r3hdm1	R3H domain containing 1	R3H domain containing 1	R3HDM1	23518
AW343976	1.02095	0.0664776	0.856491	0.132809	0.708013	0.0503827	0.0372	ENSDART00000126198	ENSDARG00000030012	9:25099747-25141862	1	Dr.20533	AW343976	ZDB-GENE-030131-99	lrrfip1a	leucine rich repeat (in FLII) interacting protein 1a	leucine rich repeat (in FLII) interacting protein 1	LRRFIP1	9208
AW419561	0.853027	0.153325	1.17376	0.104335	1.79126	0.273199	0.0372					Dr.75522	CT735678	ZDB-GENE-040426-2003	got1	glutamic-oxaloacetic transaminase 1, soluble	glutamic-oxaloacetic transaminase 1, soluble (aspartate aminotransferase 1)	GOT1	2805
AW777355	1.00416	0.0808051	0.825959	0.196013	0.639082	0.0699524	0.0372	ENSDART00000064025	ENSDARG00000043601	3:13606129-13608105	1	Dr.76445	CT707208	ZDB-GENE-040426-1385	elof1	elongation factor 1 homolog (S. cerevisiae)	elongation factor 1 homolog (S. cerevisiae)	ELOF1	84337
BF156211	1.02253	0.0857387	1.44725	0.213138	1.50455	0.103244	0.0372	ENSDART00000143921	ENSDARG00000045411	24:11203988-11218386	-1	Dr.11446	BF156211	ZDB-GENE-040426-814	acad11	acyl-Coenzyme A dehydrogenase family, member 11	acyl-Coenzyme A dehydrogenase family, member 11	ACAD11	84129
BF717500	0.96484	0.106471	1.33953	0.231728	1.66459	0.0837333	0.0372	ENSDART00000067560	ENSDARG00000014727	6:21709051-21724572	1	Dr.154195	EE322707
BI428543	0.969669	0.0533545	0.696558	0.0622367	0.718637	0.0408223	0.0372	ENSDART00000009132	ENSDARG00000012688	19:6042298-6045806	1	Dr.75862	EV560037	ZDB-GENE-030131-956	eif1b	eukaryotic translation initiation factor 1B	eukaryotic translation initiation factor 1B	EIF1B	10289
BI563231	1.0161	0.0893551	0.778763	0.110481	0.511574	0.0953901	0.0372	ENSDART00000056286	ENSDARG00000038559	24:39080414-39081731	-1	Dr.124197	EB908688
BI671284	0.996736	0.0947771	1.28114	0.131758	1.52375	0.130139	0.0372	ENSDART00000063135	ENSDARG00000043003	22:11706582-11725123	-1	Dr.130719	EE208417
BI671843	1.11468	0.159613	0.59739	0.0956564	0.623777	0.0516752	0.0372					Dr.83397	CT667280
BI840724	0.978406	0.0768332	0.648276	0.218591	0.674498	0.0537347	0.0372					Dr.110022	BI672279
BI845187	1.08121	0.113976	0.736155	0.0419013	0.584195	0.0793115	0.0372					Dr.12565	BM070969	ZDB-GENE-030131-6995	wu:fa12e08
BI867040	0.955689	0.148083	1.14808	0.205073	1.80649	0.17945	0.0372	ENSDART00000132083	ENSDARG00000009885	3:29807248-29810148	-1	Dr.84486	BI867040	ZDB-GENE-061207-52	sult3st1
BI878917	1.03829	0.0786612	0.650187	0.086858	0.699777	0.0536919	0.0372	ENSDART00000016105	ENSDARG00000008224	7:44487091-44541982	-1	Dr.105959	AI793638
BI888150	1.09583	0.133777	0.938555	0.0823381	0.64305	0.0512327	0.0372	ENSDART00000039443	ENSDARG00000006260	6:6889762-6892921	-1	Dr.121796	CT617834	ZDB-GENE-040426-860	tuba8l4
BI889170	0.941169	0.0748352	0.56161	0.0456455	0.565866	0.0662633	0.0372	ENSDART00000027115	ENSDARG00000016080	18:4496703-4510755	-1	Dr.9728	AW777402	ZDB-GENE-030131-3112	wu:fc27e05
BI889268	0.972517	0.138412	1.49241	0.181996	1.98228	0.187214	0.0372	ENSDART00000004181	ENSDARG00000017047	10:10704776-10748706	1	Dr.132883	BI889268	ZDB-GENE-050417-248	slc27a4	solute carrier family 27 (fatty acid transporter), member 4	solute carrier family 27 (fatty acid transporter), member 4	SLC27A4	10999
BI890456	0.867919	0.128939	1.61546	0.190549	2.07631	0.343957	0.0372	ENSDART00000112538	ENSDARG00000078533	11:292671-295809	-1	Dr.150982	NM_213049	ZDB-GENE-040426-1993	poc1a	POC1 centriolar protein homolog A (Chlamydomonas)	POC1 centriolar protein homolog A (Chlamydomonas)	POC1A	25886
BI892004	1.06832	0.165215	0.348962	0.10044	0.522915	0.0400773	0.0372	ENSDART00000026295	ENSDARG00000011545	7:27046660-27129626	1	Dr.132395	AW058995	ZDB-GENE-040426-1332	arrb2b	arrestin, beta 2b	arrestin, beta 2	ARRB2	409
BI892323	0.924453	0.111665	1.26138	0.168506	1.51396	0.118119	0.0372	ENSDART00000017436	ENSDARG00000019228	10:33489695-33565567	-1	Dr.77610	BI892323	ZDB-GENE-041010-186	mogat2	monoacylglycerol O-acyltransferase 2	monoacylglycerol O-acyltransferase 2	MOGAT2	80168
BI892352	1.02836	0.0787679	0.793288	0.0824955	0.684452	0.0645067	0.0372	ENSDART00000052421	ENSDARG00000036107	19:24974068-24977991	1	Dr.143800	CT703233
BI985013	1.00261	0.113625	1.11752	0.23693	1.59462	0.104475	0.0372	ENSDART00000104528	ENSDARG00000040747	22:41086019-41096460	-1	Dr.77381	EH524629	ZDB-GENE-040801-231	tm4sf4	transmembrane 4 L six family member 4	transmembrane 4 L six family member 4	TM4SF4	7104
BM071872	0.984875	0.095752	0.840343	0.120628	0.632333	0.0617635	0.0372	ENSDART00000049793	ENSDARG00000042533	8:26148103-26150871	1	Dr.105554	EB786446	ZDB-GENE-030911-2	gstm
BM082827	0.821197	0.101676	0.627683	0.110731	0.417633	0.0720294	0.0372	ENSDART00000080247	ENSDARG00000057550	14:19874099-19890316	-1	Dr.84738	BM082827	ZDB-GENE-060810-140	trim105
BM103297	1.0433	0.0619497	0.977969	0.0824865	0.710763	0.0700942	0.0372	ENSDART00000137505	ENSDARG00000031283	19:10082968-10095471	-1	Dr.81227	BI983136
BM185112	1.03656	0.0932135	0.761892	0.225884	0.712259	0.0408096	0.0372	ENSDART00000024244	ENSDARG00000009802	25:38443104-38449503	1	Dr.10291	AL922495	ZDB-GENE-040426-1474	chmp1a	chromatin modifying protein 1A	chromatin modifying protein 1A	CHMP1A	5119
AI957497	0.977089	0.0335886	0.894257	0.0976233	0.735852	0.0550739	0.0373	ENSDART00000113508	ENSDARG00000079780	5:64862248-64881770	1	Dr.150360	BI887888
BI889658	1.00153	0.0615942	0.72617	0.0794489	0.670396	0.0698804	0.0373	ENSDART00000009838	ENSDARG00000019897	10:42726956-42764615	-1	Dr.18865	CT633736	ZDB-GENE-060421-5102	zgc:136875
BI879444	1.014	0.111603	0.808175	0.0668366	0.629854	0.0647831	0.0379	ENSDART00000145937	ENSDARG00000020504	3:45814493-45816222	-1	Dr.123314	BM184249
AW116526	0.994947	0.0712606	1.00917	0.143411	1.4961	0.158282	0.039	ENSDART00000003246	ENSDARG00000016636	17:10456744-10510720	-1	Dr.33071	AW116526	ZDB-GENE-040426-2823	sec23a	Sec23 homolog A (S. cerevisiae)	Sec23 homolog A (S. cerevisiae)	SEC23A	10484
BG305809	1.04931	0.0971591	1.21212	0.211541	0.693986	0.0634076	0.039	ENSDART00000003143	ENSDARG00000018742	12:25551415-25562994	1	Dr.75389	BM186080	ZDB-GENE-100316-4	psme4b	proteasome (prosome, macropain) activator subunit 4b	proteasome (prosome, macropain) activator subunit 4	PSME4	23198
BM181246	0.979115	0.173692	1.30332	0.176867	2.29273	0.520559	0.039	ENSDART00000060822	ENSDARG00000095863	16:48978543-48981385	-1	Dr.75873	AI616731	ZDB-GENE-030131-5217	zgc:161979
AF387819	1.02645	0.0887372	1.22627	0.0724691	1.48629	0.12266	0.0399	ENSDART00000060056	ENSDARG00000040988	16:13990612-14005001	1	Dr.4157	EB796758	ZDB-GENE-020416-4	tpi1b	triosephosphate isomerase 1b	triosephosphate isomerase 1	TPI1	7167
AW115525	0.955699	0.0553557	0.819366	0.0753694	0.702014	0.0549279	0.0399	ENSDART00000033559	ENSDARG00000034700	4:5460438-5471073	-1	Dr.79865	AW115525	ZDB-GENE-030131-4605	vegfab	vascular endothelial growth factor Ab	vascular endothelial growth factor A	VEGFA	7422
AW115860	1.01851	0.134855	0.769294	0.0927188	0.59586	0.0678864	0.0399					Dr.123567	BI350425
AW171367	0.921034	0.0572684	1.0991	0.378087	0.62468	0.0654851	0.0399	ENSDART00000075222	ENSDARG00000053225	16:36207421-36342062	1	Dr.159616	AW171367	ZDB-GENE-040426-2317	gnl2	guanine nucleotide binding protein-like 2 (nucleolar)	guanine nucleotide binding protein-like 2 (nucleolar)	GNL2	29889
BI475993	0.947933	0.122934	1.07044	0.122625	1.81083	0.304883	0.0412					Dr.83826	BI881658
BI672308	0.750501	0.14635	0.409304	0.0998643	0.365123	0.0331143	0.0412	ENSDART00000073846	ENSDARG00000052074	7:53271586-53280247	1	Dr.45962	BI672833
AI964264	0.964576	0.0816979	1.19974	0.21586	1.56151	0.205897	0.0417	ENSDART00000027393	ENSDARG00000016598	25:22500353-22518129	1	Dr.75931	AW280207	ZDB-GENE-030131-611	ckmt1
AF006007	1.01858	0.163411	1.5337	0.307854	1.89945	0.271062	0.0421	ENSDART00000109863	ENSDARG00000029688	3:26920154-26922329	1	Dr.114305	GO941284	ZDB-GENE-990415-91	hsp70.1
AF038425	1.01253	0.0842	1.69546	0.303307	1.5246	0.179914	0.0421	ENSDART00000017977	ENSDARG00000014986	2:41563896-41583420	-1	Dr.75831	AW778539	ZDB-GENE-990415-9	acvr1l
AF067201	0.934428	0.12827	1.08904	0.113515	1.53848	0.174359	0.0421	ENSDART00000059886	ENSDARG00000040856	25:25749747-25758098	-1	Dr.4212	EB986162	ZDB-GENE-991026-5	ldha	lactate dehydrogenase A4	lactate dehydrogenase A	LDHA	3939
AF121796	0.957327	0.133705	1.05804	0.128737	1.52097	0.0827561	0.0421	ENSDART00000024328	ENSDARG00000012903	1:13317179-13327647	1	Dr.113486	CF265652	ZDB-GENE-000524-1	slc34a2a
AF361478	1.02848	0.0571692	1.36319	0.178573	1.68633	0.246332	0.0421	ENSDART00000122648	ENSDARG00000019838	1:22058232-22067355	-1	Dr.78436	EB873239	ZDB-GENE-011022-1	ugdh	UDP-glucose dehydrogenase	UDP-glucose dehydrogenase	UGDH	7358
AI106312	0.97048	0.088867	0.738922	0.0869125	0.686862	0.0480008	0.0421	ENSDART00000098643	ENSDARG00000068265	14:46995798-46998792	1	Dr.76051	EX158451	ZDB-GENE-040724-90	tomm5	translocase of outer mitochondrial membrane 5 homolog (yeast)	translocase of outer mitochondrial membrane 5 homolog (yeast)	TOMM5	401505
AI331055	1.01643	0.0652442	0.790529	0.0551425	0.754042	0.0660178	0.0421	ENSDART00000108703	ENSDARG00000077934	11:209716-214312	-1	Dr.47346	EB764127	ZDB-GENE-030826-10	tegt
AI331579	0.895259	0.174584	1.26507	0.254182	1.85761	0.353743	0.0421	ENSDART00000086946	ENSDARG00000061177	8:28512187-28540038	-1	Dr.74181	AI331579	ZDB-GENE-030131-9089	mov10b.1	Moloney leukemia virus 10, homolog, b.1	Mov10, Moloney leukemia virus 10, homolog (mouse)	MOV10	4343
AI477220	0.968201	0.0913391	1.21718	0.161	1.8277	0.380689	0.0421	ENSDART00000104492	ENSDARG00000011636	25:31352633-31419471	-1	Dr.51915	AI497394	ZDB-GENE-041014-96	si:ch211-93f2.1
AI544657	1.15247	0.124787	0.917899	0.118477	0.677475	0.104093	0.0421	ENSDART00000032268	ENSDARG00000022670	22:14246501-14248780	1	Dr.31549	AI544657	ZDB-GENE-040518-1	he2	hatching enzyme 2	astacin-like metalloendopeptidase (M12 family)	ASTL	431705
AI585200	0.989427	0.083366	0.960642	0.0938255	0.683418	0.0646355	0.0421	ENSDART00000121531	ENSDARG00000040334	10:6838955-6850186	-1	Dr.132178	CT699631	ZDB-GENE-030131-2049	mat2aa	methionine adenosyltransferase II, alpha a	methionine adenosyltransferase II, alpha	MAT2A	4144
AI601682	0.951315	0.114553	1.0161	0.130927	1.54865	0.186386	0.0421	ENSDART00000078031	ENSDARG00000055643	24:3235000-3241718	1	Dr.129450	CT602609
AI722494	0.847201	0.121927	0.89133	0.153713	1.43185	0.169965	0.0421					Dr.77121	AI522723	ZDB-GENE-040426-2014	chia.2
AI793384	0.956755	0.0670543	0.821478	0.137366	0.672698	0.0677394	0.0421					Dr.5502	EE206863	ZDB-GENE-030131-1662	dspb	desmoplakin b	desmoplakin	DSP	1832
AI793655	0.882602	0.113623	1.26707	0.263406	1.45649	0.159819	0.0421	ENSDART00000141255	ENSDARG00000039483	13:25657664-25660604	1	Dr.78967	AI793655	ZDB-GENE-030616-560	si:dkey-51a16.9
AI794641	0.911067	0.125376	0.698929	0.073854	0.567225	0.0474284	0.0421	ENSDART00000146742	ENSDARG00000020465	5:26543218-26545005	-1	Dr.76923	EB945142	ZDB-GENE-030131-1600	ewsr1b	Ewing sarcoma breakpoint region 1b	Ewing sarcoma breakpoint region 1	EWSR1	2130
AI959376	1.09666	0.155193	0.690224	0.078106	0.636566	0.073082	0.0421	ENSDART00000144961	ENSDARG00000045306	24:25584284-25590905	-1	Dr.27305	AI477455	ZDB-GENE-040912-10	zgc:92111	zgc:92111	organic solute transporter alpha	OSTalpha	200931
AI965312	0.944378	0.153008	1.46486	0.212467	2.23208	0.654613	0.0421	ENSDART00000048073	ENSDARG00000058381	23:10253431-10271922	1	Dr.122072	AI965312
AW076610	1.0596	0.113257	0.624765	0.10792	0.604892	0.101102	0.0421					Dr.22311	AW076610
AW128274	0.776253	0.123988	1.37772	0.174199	1.29437	0.117914	0.0421	ENSDART00000113899	ENSDARG00000076552	21:14292454-14305569	-1	Dr.154592	EV556534
AW154620	0.863536	0.140716	0.591793	0.118131	0.45119	0.0841379	0.0421	ENSDART00000148675	ENSDARG00000063626	13:184378-184799	1	Dr.104447	EH465063	ZDB-GENE-031113-10	ddx21	DEAD (Asp-Glu-Ala-Asp) box polypeptide 21	DEAD (Asp-Glu-Ala-Asp) box polypeptide 21	DDX21	9188
AW232289	0.949745	0.181729	0.623994	0.0596312	0.503637	0.0739695	0.0421	ENSDART00000052104	ENSDARG00000035890	19:33870883-33875837	-1	Dr.76172	AI313713	ZDB-GENE-030131-7434	fuca1	fucosidase, alpha-L- 1, tissue	fucosidase, alpha-L- 1, tissue	FUCA1	2517
AW233578	0.967331	0.121405	0.980382	0.288661	0.635374	0.0567918	0.0421	ENSDART00000056614	ENSDARG00000035066	3:19931192-19952956	-1	Dr.125650	EB869287
AW420822	0.979828	0.272486	0.615465	0.115462	0.40098	0.0741314	0.0421	ENSDART00000005436	ENSDARG00000012395	10:39959934-39979810	1	Dr.81475	BG728871	ZDB-GENE-031202-2	mmp13a	matrix metalloproteinase 13a	matrix metallopeptidase 13 (collagenase 3)	MMP13	4322
AW421939	0.995372	0.139636	1.29937	0.24334	1.70732	0.205625	0.0421	ENSDART00000028709	ENSDARG00000022767	20:31295686-31310496	1	Dr.76570	AI626413	ZDB-GENE-030131-9732	apobl
BF717548	0.946478	0.0627489	0.989399	0.0930867	1.38818	0.152882	0.0421	ENSDART00000142869	ENSDARG00000092155	16:26224070-26228042	1	Dr.104980	CK687385	ZDB-GENE-030131-2168	apoc2	apolipoprotein C-II	apolipoprotein C-II	APOC2	344
BG303835	0.907181	0.189104	0.326717	0.097156	0.387195	0.0990102	0.0421	ENSDART00000009500	ENSDARG00000009336	5:36167263-36193400	1	Dr.143213	BI878126	ZDB-GENE-030131-2755	WITHDRAWN:wu:fc17c12
BG305515	1.04191	0.0370806	0.76427	0.039942	0.806979	0.0608336	0.0421					Dr.11111	BG305515
BG727249	1.02746	0.101393	0.900566	0.113443	0.658443	0.0797401	0.0421	ENSDART00000128338	ENSDARG00000038068	3:25371388-25376631	-1	Dr.159986	DN858260
BG728693	1.05065	0.147016	1.46772	0.216736	1.74287	0.221276	0.0421					Dr.159859	BI884200
BG884572	1.16067	0.205411	1.58402	0.18555	1.95751	0.104859	0.0421	ENSDART00000112061	ENSDARG00000074169	12:33191100-33221664	1
BI427755	1.01964	0.0716462	0.778131	0.0763271	0.755089	0.0617776	0.0421					Dr.159735	CN511537
BI474798	0.990215	0.109201	0.820146	0.130526	0.597361	0.0864762	0.0421	ENSDART00000129219	ENSDARG00000018312	7:61701881-61750824	-1	Dr.83208	BI474798
BI563281	1.02471	0.154824	1.22491	0.228101	1.7375	0.224798	0.0421	ENSDART00000099503	ENSDARG00000068724	6:59116225-59148579	1	Dr.128606	BI710626	ZDB-GENE-071213-1	shmt2	serine hydroxymethyltransferase 2 (mitochondrial)	serine hydroxymethyltransferase 2 (mitochondrial)	SHMT2	6472
BI670883	1.03095	0.121796	0.757952	0.163294	0.655618	0.0672579	0.0421	ENSDART00000099984	ENSDARG00000068978	13:45407674-45428380	-1	Dr.150385	CO351714
BI672309	0.854567	0.12865	0.474813	0.16723	0.399473	0.0903613	0.0421	ENSDART00000088340	ENSDARG00000061713	19:33149792-33183910	1	Dr.105047	BI672834	ZDB-GENE-060503-680	tpd52	tumor protein D52	tumor protein D52	TPD52	7163
BI710724	1.03495	0.0747059	0.911715	0.077288	0.757543	0.0668071	0.0421					Dr.93589	BM070812
BI842933	0.876208	0.142234	0.5019	0.101395	0.482951	0.0681616	0.0421	ENSDART00000105931	ENSDARG00000075718	16:49557011-49560548	1	Dr.79973	BF717719	ZDB-GENE-030131-4678	rpz5
BI843250	1.03643	0.0489895	0.897163	0.117305	0.612202	0.105681	0.0421	ENSDART00000011229	ENSDARG00000007720	5:42762145-42769912	1	Dr.13991	BI673350	ZDB-GENE-040718-209	sub1	SUB1 homolog (S. cerevisiae)	SUB1 homolog (S. cerevisiae)	SUB1	10923
BI863940	0.975732	0.0505329	0.754033	0.109164	0.713634	0.0692761	0.0421
BI864018	0.966309	0.0676896	0.909318	0.104904	0.728522	0.0525806	0.0421	ENSDART00000131116	ENSDARG00000007678	1:10962801-11030729	-1	Dr.81168	BI863852
BI867009	0.969579	0.10183	1.24316	0.3294	1.66035	0.26049	0.0421	ENSDART00000098287	ENSDARG00000053293	2:43232266-43236818	-1	Dr.76366	AI331392	ZDB-GENE-060512-201	ftr14
BI878416	1.05732	0.0680546	0.788057	0.170737	0.704591	0.0831527	0.0421					Dr.80405	CO360685	ZDB-GENE-040426-2103	tdrd7	tudor domain containing 7	tudor domain containing 7	TDRD7	23424
BI878753	0.789209	0.143949	0.38717	0.0534906	0.299937	0.0964251	0.0421	ENSDART00000125454	ENSDARG00000089050	17:21700057-21709731	-1	Dr.4937	AI544855	ZDB-GENE-030131-4696	wu:fd52f06
BI887495	0.962833	0.0747274	1.01815	0.123212	0.671927	0.0705171	0.0421	ENSDART00000133482	ENSDARG00000094252	22:33021089-33022846	1	Dr.123733	BM005420
BI889697	0.978752	0.0694501	1.01005	0.138019	1.30267	0.0785716	0.0421	ENSDART00000018025	ENSDARG00000035178	5:56920837-56938194	-1	Dr.23554	CK680755	ZDB-GENE-040808-7	gna14	guanine nucleotide binding protein (G protein), alpha 14	guanine nucleotide binding protein (G protein), alpha 14	GNA14	9630
BI896231	0.932876	0.105538	1.02409	0.178735	1.42902	0.150904	0.0421					Dr.48690	EB897357	ZDB-GENE-030131-2748	eif3b	eukaryotic translation initiation factor 3, subunit B	eukaryotic translation initiation factor 3, subunit B	EIF3B	8662
BI979971	1.31775	0.348799	1.13711	0.479837	0.529076	0.133917	0.0421					Dr.5432	AI477016	ZDB-GENE-030131-969	wu:fb54e10
BI981058	1.08967	0.129144	0.873239	0.110228	0.693524	0.0809012	0.0421	ENSDART00000148887	ENSDARG00000019622	16:47175091-47235621	-1	Dr.82836	BG308618	ZDB-GENE-040426-1656	rims2a	regulating synaptic membrane exocytosis 2a	regulating synaptic membrane exocytosis 2	RIMS2	9699
BM071848	1.07376	0.185326	1.12617	0.190978	1.84276	0.179505	0.0421	ENSDART00000092497	ENSDARG00000063344	24:21535654-21543114	1	Dr.76028	EB981395	ZDB-GENE-030131-8307	zgc:162943
BM095252	0.927324	0.170272	0.976391	0.0942406	1.63963	0.17586	0.0421	ENSDART00000043956	ENSDARG00000029848	2:22117431-22134663	1	Dr.17305	BM095252	ZDB-GENE-070410-13	zgc:161973
BM183894	1.12255	0.130471	1.25926	0.0930082	1.84767	0.22997	0.0421					Dr.75522	BG728930	ZDB-GENE-040426-2003	got1	glutamic-oxaloacetic transaminase 1, soluble	glutamic-oxaloacetic transaminase 1, soluble (aspartate aminotransferase 1)	GOT1	2805
BM184851	1.12027	0.130327	1.15515	0.166986	0.730172	0.0730195	0.0421	ENSDART00000140084	ENSDARG00000094850	10:15053596-15059803	1	Dr.123166	BM184851
BM530206	0.967947	0.0445551	0.729018	0.0792936	0.707871	0.069392	0.0421	ENSDART00000147842	ENSDARG00000094004	9:1361605-1365119	1	Dr.134848	BC155220	ZDB-GENE-050208-786	si:dkey-1b17.11
U03875	0.964829	0.131704	1.26846	0.203084	1.64086	0.21371	0.0421	ENSDART00000111386	ENSDARG00000079964	9:3393859-3397177	-1	Dr.2	AW280020	ZDB-GENE-980526-212	dlx2a	distal-less homeobox gene 2a	distal-less homeo box 2	DLX2	1746
BI476547	1.10902	0.105051	1.12065	0.0835952	1.64099	0.181197	0.0424	ENSDART00000076328	ENSDARG00000054172	21:36762307-36766175	1	Dr.76132	AI331563	ZDB-GENE-041114-91	pgrmc1
BM183807	1.02057	0.0549003	0.966727	0.122711	1.25934	0.0695504	0.0425	ENSDART00000128047	ENSDARG00000052304	6:24021387-24036382	1	Dr.77076	BQ617909	ZDB-GENE-040426-1792	uqcrc1	ubiquinol-cytochrome c reductase core protein I	ubiquinol-cytochrome c reductase core protein I	UQCRC1	7384
AB023488	0.868784	0.247752	1.06826	0.161676	2.19434	0.563808	0.0429	ENSDART00000122271	ENSDARG00000045219	12:7149337-7151441	1	Dr.81256	CK711259	ZDB-GENE-990708-5	dkk1b	dickkopf 1b	dickkopf homolog 1 (Xenopus laevis)	DKK1	22943
BE556846	0.99841	0.061003	0.963496	0.0627507	0.652502	0.0918752	0.0429	ENSDART00000127487	ENSDARG00000016889	3:55433742-55441489	1	Dr.161	CT594849	ZDB-GENE-040426-1076	eif3g	eukaryotic translation initiation factor 3, subunit G	eukaryotic translation initiation factor 3, subunit G	EIF3G	8666
BF717900	1.08115	0.10552	1.39374	0.283935	2.43545	0.749726	0.0429					Dr.125384	CK698584
BI840124	0.941505	0.104117	1.29652	0.188752	1.57089	0.251114	0.0429	ENSDART00000098983	ENSDARG00000068437	11:38513117-38547338	-1	Dr.30677	AW566846	ZDB-GENE-061103-541	agpat2	1-acylglycerol-3-phosphate O-acyltransferase 2 (lysophosphatidic acid acyltransferase, beta)	1-acylglycerol-3-phosphate O-acyltransferase 2 (lysophosphatidic acid acyltransferase, beta)	AGPAT2	10555
BI843062	1.0662	0.115465	0.92304	0.0727398	0.761153	0.0418862	0.0429	ENSDART00000114196	ENSDARG00000077243	12:922361-983336	1
BI896327	0.882314	0.162157	0.487024	0.092811	0.480725	0.0702422	0.0429	ENSDART00000141498	ENSDARG00000022456	23:22968985-22971946	1	Dr.4724	AI106420	ZDB-GENE-030131-6048	eno1a	enolase 1a, (alpha)	enolase 1, (alpha)	ENO1	2023
BM183855	1.03047	0.108872	0.77002	0.0699161	0.59473	0.10758	0.0435	ENSDART00000045607	ENSDARG00000005446	25:5016485-5038286	1	Dr.75286	CD585935	ZDB-GENE-051120-174	ckap5	cytoskeleton associated protein 5	cytoskeleton associated protein 5	CKAP5	9793
AI667140	1.01809	0.0656868	0.867328	0.0731011	0.761105	0.0662001	0.0436	ENSDART00000128759	ENSDARG00000089004	23:34317406-34339418	1	Dr.97075	CT690107
BI887534	0.869926	0.204288	0.593273	0.133239	0.449109	0.0474117	0.0444					Dr.156389	BC160602	ZDB-GENE-041014-277	wdr26b	WD repeat domain 26b	WD repeat domain 26	WDR26	80232
AF397016	1.0881	0.0625256	1.10902	0.0680711	0.855626	0.0596169	0.045	ENSDART00000135831	ENSDARG00000013415	16:32829070-32833296	-1	Dr.10311	AL920741	ZDB-GENE-020424-3	lmna	lamin A	lamin A/C	LMNA	4000
AB051678	0.96434	0.100756	1.73166	0.417126	1.39064	0.130449	0.0452	ENSDART00000103229	ENSDARG00000032485	16:25409913-25429162	1	Dr.83331	AB055674	ZDB-GENE-011108-1	efna3b	ephrin A3b	ephrin-A3	EFNA3	1944
AW115597	1.0035	0.0489242	0.71857	0.132974	0.736566	0.075205	0.0452	ENSDART00000009178	ENSDARG00000006900	8:26912620-26932083	1	Dr.2636	BG304065	ZDB-GENE-030114-5	impdh2
AW116584	1.10288	0.196803	0.550915	0.0784015	0.63257	0.078749	0.0452	ENSDART00000044411	ENSDARG00000053326	2:53090568-53178564	-1
BM154614	1.05079	0.0794588	0.805499	0.126689	0.722929	0.0866387	0.0452
U89295	0.983258	0.182134	1.71126	0.346689	1.74315	0.220577	0.0452	ENSDART00000105774	ENSDARG00000020080	24:28418728-28585492	1	Dr.75760	AL730068	ZDB-GENE-990415-58	ek1
AI558350	1.04072	0.0742461	0.96603	0.0557246	1.43762	0.144073	0.0456
BE200673	0.975124	0.146957	0.613781	0.100334	0.590293	0.0754889	0.0456	ENSDART00000044128	ENSDARG00000034916	9:3278943-3310741	1	Dr.104658	BE201275	ZDB-GENE-040912-99	hat1	histone acetyltransferase 1	histone acetyltransferase 1	HAT1	8520
AW019716	0.906192	0.121723	1.30078	0.206096	1.93142	0.554299	0.0487	ENSDART00000019617	ENSDARG00000004952	17:35524581-35528452	-1	Dr.80053	AW019716	ZDB-GENE-050913-129	rsad2	radical S-adenosyl methionine domain containing 2	radical S-adenosyl methionine domain containing 2	RSAD2	91543
AF359505	1.0209	0.113131	1.38945	0.148516	1.60649	0.225593	0.0491	ENSDART00000044190	ENSDARG00000009510	16:820650-824806	1	Dr.83685	AL913772	ZDB-GENE-040707-1	irx1a	iroquois homeobox protein 1, a	iroquois homeobox protein 1	IRX1	79192
AI477584	0.883146	0.250388	0.882613	0.213392	2.10624	0.528936	0.0497					Dr.148457	AI477584
AI497222	1.04111	0.159918	0.928224	0.148104	1.71535	0.223981	0.0497	ENSDART00000140807	ENSDARG00000010541	3:50204093-50218501	1	Dr.114476	EB878742	ZDB-GENE-040912-22	zgc:92161
AW171233	0.896266	0.112846	0.834534	0.11754	1.36459	0.151126	0.0497	ENSDART00000122138	ENSDARG00000091260	2:427011-447851	1
AI793508	0.984232	0.0849364	1.44151	0.129245	1.44947	0.182428	0.0499	ENSDART00000144360	ENSDARG00000014101	13:40632536-40650374	-1	Dr.41107	AI793508	ZDB-GENE-050506-147	pyroxd2	pyridine nucleotide-disulphide oxidoreductase domain 2	pyridine nucleotide-disulphide oxidoreductase domain 2	PYROXD2	84795
AW128595	1.03262	0.115677	1.53057	0.189454	1.70179	0.275294	0.05	ENSDART00000062666	ENSDARG00000007743	15:19317110-19323664	1	Dr.37800	AW078198	ZDB-GENE-041111-173	il15l
BI473509	1.39504	0.271366	2.71102	0.643413	3.49198	1.29291	0.05	ENSDART00000030420	ENSDARG00000024815	11:20512273-20516215	-1	Dr.77515	BI473509	ZDB-GENE-030616-523	ogfrl2
BM036680	0.982671	0.0327984	0.891259	0.0636697	0.711393	0.0819048	0.0504	ENSDART00000099748	ENSDARG00000068868	7:33110586-33129341	-1	Dr.150828	NM_001007453	ZDB-GENE-041114-168	nap1l4b	nucleosome assembly protein 1-like 4b	nucleosome assembly protein 1-like 4	NAP1L4	4676
BI886878	1.16045	0.269915	1.07494	0.202385	0.595369	0.0846022	0.051
BG727455	0.91849	0.0647598	0.664294	0.116455	0.61101	0.0883278	0.0525	ENSDART00000077495	ENSDARG00000076177	12:23915882-23926807	1	Dr.79109	BG727455	ZDB-GENE-041008-78	polr2a	polymerase (RNA) II (DNA directed) polypeptide A	polymerase (RNA) II (DNA directed) polypeptide A, 220kDa	POLR2A	5430
AI721360	1.01155	0.0423842	0.791967	0.0794239	0.808519	0.0626811	0.056	ENSDART00000150732	ENSDARG00000094017	4:39381777-39398900	1	Dr.111964	EH519502
BI705584	1.082	0.18397	1.23415	0.0825028	1.7549	0.184814	0.056					Dr.80602	BI877643	ZDB-GENE-030131-5986	wu:fi28f11
AW175351	1.00075	0.146505	0.403548	0.0674716	0.448367	0.150857	0.0576	ENSDART00000073410	ENSDARG00000070331	25:8564866-8607907	1	Dr.89581	BM157197
BI865738	0.887114	0.109581	1.49317	0.146212	1.50484	0.280839	0.0578					Dr.84413	BI865738
BG302614	0.949901	0.19931	2.06628	0.325848	1.6577	0.177019	0.0584
BI672346	1.01902	0.212256	1.96858	0.24322	2.38108	0.818172	0.0599					Dr.83435	EB920086	ZDB-GENE-070424-28	zgc:162239
AA605677	0.968498	0.234655	0.803317	0.0857953	0.510554	0.0747455	0.0603	ENSDART00000140167	ENSDARG00000093817	16:54738085-54740061	1	Dr.104496	CT706209	ZDB-GENE-051030-81	hmgn2	high-mobility group nucleosomal binding domain 2	high-mobility group nucleosomal binding domain 2	HMGN2	3151
BE200571	1.03991	0.0419123	0.736276	0.123695	0.751138	0.091964	0.0603	ENSDART00000130384	ENSDARG00000044573	11:40353953-40381846	1	Dr.150531	AY398322	ZDB-GENE-030131-8783	cdc42	cell division cycle 42	cell division cycle 42 (GTP binding protein, 25kDa)	CDC42	998
BI891492	1.02871	0.0706633	0.763023	0.0930636	0.755779	0.0818236	0.062	ENSDART00000128153	ENSDARG00000029248	2:8433697-8447444	1	Dr.159479	AI444219
BM023802	1.01794	0.0451251	0.436905	0.096437	0.612847	0.125217	0.062					Dr.133752	BM023802
AF164512	1.09809	0.0795597	1.53325	0.219924	1.51158	0.16953	0.0622					Dr.81313	BC162213	ZDB-GENE-000210-31	vdra	vitamin D receptor a	vitamin D (1,25- dihydroxyvitamin D3) receptor	VDR	7421
AW116717	0.930382	0.182465	0.497697	0.0535653	0.548546	0.0669792	0.0633					Dr.7839	CT599228	ZDB-GENE-030131-2796	wu:fc18a05
AI353648	1.18611	0.196355	1.064	0.15448	2.07413	0.386446	0.0642	ENSDART00000133884	ENSDARG00000053858	17:37555497-37562965	-1	Dr.39013	AA566771	ZDB-GENE-041111-1	crip1
AF028723	1.13336	0.163227	0.824058	0.316433	1.83937	0.279967	0.0654	ENSDART00000051539	ENSDARG00000035553	5:25293619-25297101	1	Dr.15721	AF028723	ZDB-GENE-010619-2	cx27.5	connexin 27.5	gap junction protein, beta 1, 32kDa (connexin 32, Charcot-Marie-Tooth neuropathy, X-linked)	GJB1	2705
AW116204	1.02218	0.162244	1.09833	0.0792893	1.60754	0.188903	0.0656	ENSDART00000143183	ENSDARG00000035507	5:31364918-31370371	1	Dr.79241	AL919645	ZDB-GENE-030131-3973	si:ch211-89p1.3
BI475878	0.976854	0.0571859	1.26505	0.144627	1.25852	0.112758	0.0656	ENSDART00000124197	ENSDARG00000088444	20:4136588-4146982	1	Dr.151255	BI474962
AW595163	1.02506	0.0553046	0.682528	0.0930563	0.697976	0.106984	0.0691					Dr.142266	AW566748	ZDB-GENE-030909-10	itgb1b	integrin, beta 1b	integrin, beta 1	ITGB1	3688
BI709515	1.04774	0.168176	1.29983	0.189186	0.696691	0.0520155	0.0701	ENSDART00000082761	ENSDARG00000002912	11:25733715-25748095	1	Dr.150882	CV481660
AW128470	1.03723	0.124759	1.00002	0.0881778	1.48509	0.160557	0.0744	ENSDART00000050847	ENSDARG00000035120	5:69158109-69190378	1	Dr.76732	EB916638	ZDB-GENE-030131-340	gldc	glycine dehydrogenase (decarboxylating)	glycine dehydrogenase (decarboxylating)	GLDC	2731
AW233044	0.962318	0.0547656	0.776	0.0642773	0.634638	0.10984	0.0744	ENSDART00000065652	ENSDARG00000077069	13:23210793-23214666	-1	Dr.24158	EV563158	ZDB-GENE-030131-7127	srgn	serglycin	serglycin	SRGN	5552
AW777717	0.908671	0.1498	1.83618	0.517768	1.45921	0.206652	0.0744	ENSDART00000005296	ENSDARG00000020332	17:38422623-38423908	1	Dr.79439	AW777717	ZDB-GENE-030131-4340	nkx2.9
BE605273	1.01737	0.0668114	1.57718	0.178782	1.29568	0.108835	0.0744	ENSDART00000060255	ENSDARG00000025977	15:27983464-28026609	-1	Dr.1479	CT619507	ZDB-GENE-030131-8485	blmh	bleomycin hydrolase	bleomycin hydrolase	BLMH	642
BI880593	1.19224	0.267332	2.2854	0.273516	2.09461	0.286983	0.0744	ENSDART00000141642	ENSDARG00000068716	10:38478325-38500678	1	Dr.82732	EB961118	ZDB-GENE-061027-344	cuedc1a	CUE domain containing 1a	CUE domain containing 1	CUEDC1	404093
BG727324	1.00735	0.0790648	0.782184	0.0395464	0.794411	0.0560469	0.0745
AW595123	0.989015	0.0789785	0.695621	0.0541223	0.664426	0.106284	0.0768	ENSDART00000087065	ENSDARG00000061226	12:35487183-35531581	-1	Dr.159431	AW595123
AI957592	1.06531	0.116825	1.05832	0.0980161	0.784148	0.0645484	0.0779	ENSDART00000058162	ENSDARG00000006687	13:6470390-6484818	1	Dr.75936	GO938770	ZDB-GENE-050913-114	h2afy2	H2A histone family, member Y2	H2A histone family, member Y2	H2AFY2	55506
BI887659	0.977967	0.129486	1.05502	0.0972327	1.37712	0.099449	0.0779	ENSDART00000012672	ENSDARG00000016398	11:45922941-45937764	1	Dr.81537	BI887659	ZDB-GENE-040801-114	cant1b	calcium activated nucleotidase 1b	calcium activated nucleotidase 1	CANT1	124583
BI889609	1.02384	0.104743	0.69459	0.0910437	0.640479	0.122731	0.0779	ENSDART00000114041	ENSDARG00000006487	7:34680138-34685691	-1	Dr.150357	AL727417	ZDB-GENE-050913-48	zgc:114130
AI793521	1.03321	0.0551222	0.81664	0.0641952	0.827956	0.0688764	0.0783					Dr.129056	CT598689
AW419582	1.04911	0.0712944	1.11217	0.0482194	0.828322	0.0684277	0.0785					Dr.37082	AW419582	ZDB-GENE-061201-51	rilpl1	Rab interacting lysosomal protein-like 1	Rab interacting lysosomal protein-like 1	RILPL1	353116
AI544693	1.04694	0.0665355	0.815984	0.0618663	0.863551	0.0524014	0.0813	ENSDART00000109346	ENSDARG00000079730	2:4011338-4016439	1	Dr.127394	CT725839
BE202228	0.992141	0.130483	1.98407	0.272261	1.39943	0.126763	0.0827	ENSDART00000015820	ENSDARG00000009499	20:26343298-26388380	1	Dr.155720	BE202228	ZDB-GENE-030131-4172	syne1a	spectrin repeat containing, nuclear envelope 1a	spectrin repeat containing, nuclear envelope 1	SYNE1	23345
BM072262	0.976327	0.059719	0.607987	0.0582927	0.703153	0.0963227	0.0847	ENSDART00000114712	ENSDARG00000078528	18:429053-451198	1	Dr.140743	BI326208
AW280016	1.06542	0.220706	2.80619	1.15573	3.35826	2.47097	0.0852	ENSDART00000052805	ENSDARG00000036345	7:25881931-25886746	-1	Dr.81087	AW280016	ZDB-GENE-040426-2775	ftsjd1	FtsJ methyltransferase domain containing 1	FtsJ methyltransferase domain containing 1	FTSJD1	55783
BI882683	0.971132	0.044601	0.799089	0.0542146	0.797613	0.0617435	0.086
BE200801	1.01472	0.0465735	0.799	0.0709185	0.740645	0.100327	0.0864					Dr.122550	BE200801
AI942691	0.917929	0.087481	1.38868	0.155036	1.28501	0.165302	0.0881	ENSDART00000135192	ENSDARG00000004748	3:39467970-39483264	-1	Dr.77547	EB989111	ZDB-GENE-040801-33	zgc:100868
AF184244	0.954417	0.055644	1.12215	0.117855	0.781372	0.0578457	0.0902	ENSDART00000098443	ENSDARG00000038695	2:36845430-36855002	-1	Dr.124830	CD598595
AF173984	0.916987	0.125455	1.98949	0.153023	1.43069	0.242703	0.0932	ENSDART00000133036	ENSDARG00000014420	3:46849464-46855969	-1	Dr.75060	AL730511	ZDB-GENE-980526-76	elavl3	ELAV (embryonic lethal, abnormal vision, Drosophila)-like 3 (Hu antigen C)	ELAV (embryonic lethal, abnormal vision, Drosophila)-like 3 (Hu antigen C)	ELAVL3	1995
AA495267	1.03501	0.0476204	0.850172	0.0481631	0.873003	0.0579736	0.0948					Dr.4035	AA495267	ZDB-GENE-040426-2122	zgc:65870
AW116004	0.906071	0.0800381	0.832976	0.0858433	1.13375	0.070171	0.0969	ENSDART00000014379	ENSDARG00000071691	12:11503762-11520747	-1	Dr.2951	EE213754	ZDB-GENE-030131-1269	uqcrc2b	ubiquinol-cytochrome c reductase core protein IIb	ubiquinol-cytochrome c reductase core protein II	UQCRC2	7385

## Sheet: S2E_Int_ContVsDef
Systematic ID	Control		Deficiency		Excess		t-test	ENSEMBL				NBCI		ZFIN			Human Orthologues
	Normalized	SE	Normalized	SE	Normalized	SE	p	Transcript	Gene	map	sense	Unigene	gb	ID	Symbol	Description	Description	Symbol	Entrez Gene ID
BM005120	1.04369	0.106387	0.489523	0.0430337	0.608895	0.208988	0.0187	ENSDART00000126428	ENSDARG00000010957	12:11278305-11379187	-1	Dr.86133	BM005120	ZDB-GENE-040704-70	mpp2b	membrane protein, palmitoylated 2b (MAGUK p55 subfamily member 2b)	membrane protein, palmitoylated 2 (MAGUK p55 subfamily member 2)	MPP2	4355
AF173984	0.916987	0.125455	1.98949	0.153023	1.43069	0.242703	0.0292	ENSDART00000133036	ENSDARG00000014420	3:46849464-46855969	-1	Dr.75060	AL730511	ZDB-GENE-980526-76	elavl3	ELAV (embryonic lethal, abnormal vision, Drosophila)-like 3 (Hu antigen C)	ELAV (embryonic lethal, abnormal vision, Drosophila)-like 3 (Hu antigen C)	ELAVL3	1995
BG305515	1.04191	0.0370806	0.76427	0.039942	0.806979	0.0608336	0.0292					Dr.11111	BG305515
BI889170	0.941169	0.0748352	0.56161	0.0456455	0.565866	0.0662633	0.0292	ENSDART00000027115	ENSDARG00000016080	18:4496703-4510755	-1	Dr.9728	AW777402	ZDB-GENE-030131-3112	wu:fc27e05
AW076974	0.980008	0.0694602	1.40119	0.0693976	1.21066	0.111102	0.0393	ENSDART00000079852	ENSDARG00000017037	23:18745001-18768433	-1	Dr.76462	AL726057	ZDB-GENE-030131-445	rbb4	retinoblastoma binding protein 4	retinoblastoma binding protein 4	RBBP4	5928
AW175351	1.00075	0.146505	0.403548	0.0674716	0.448367	0.150857	0.0393	ENSDART00000073410	ENSDARG00000070331	25:8564866-8607907	1	Dr.89581	BM157197
AW343964	1.07014	0.0811239	1.7042	0.137538	1.30949	0.128567	0.0393	ENSDART00000054626	ENSDARG00000037514	14:12437128-12464078	1	Dr.80607	EV557404	ZDB-GENE-040426-847	hdac3	histone deacetylase 3	histone deacetylase 3	HDAC3	8841
BG305828	1.00199	0.0842362	0.666006	0.0387919	0.940824	0.173702	0.0393					Dr.126304	BG305828
BI533366	0.981727	0.0881174	0.580882	0.0577857	0.864348	0.14091	0.0393					Dr.75523	BM103738	ZDB-GENE-040426-1981	ubxn4	UBX domain protein 4	UBX domain protein 4	UBXN4	23190
BM072262	0.976327	0.059719	0.607987	0.0582927	0.703153	0.0963227	0.0393	ENSDART00000114712	ENSDARG00000078528	18:429053-451198	1	Dr.140743	BI326208
BM096077	1.0095	0.0393138	1.26489	0.0529653	1.14048	0.0754464	0.0393	ENSDART00000009241	ENSDARG00000018334	21:5737709-5745539	1	Dr.119727	EV562148	ZDB-GENE-020419-2	rpl35	ribosomal protein L35	ribosomal protein L35	RPL35	11224
AF071262	0.862093	0.0999156	1.3411	0.0726378	1.19141	0.137122	0.0424	ENSDART00000123475	ENSDARG00000090023	11:2108784-2111361	1	Dr.30983	BI476813	ZDB-GENE-000822-5	hoxc13b	homeo box C13b	homeo box C13	HOXC13	3229
AI106503	1.03964	0.0776644	1.40459	0.0502658	1.5502	0.124327	0.0424	ENSDART00000060166	ENSDARG00000041068	18:20959432-20969479	-1	Dr.17618	BG307496	ZDB-GENE-040426-2703	got2a	glutamic-oxaloacetic transaminase 2a, mitochondrial (aspartate aminotransferase 2)	glutamic-oxaloacetic transaminase 2, mitochondrial (aspartate aminotransferase 2)	GOT2	2806
AI545551	0.96901	0.0845378	0.633543	0.0522482	0.554318	0.0737549	0.0424					Dr.132338	AI545551
AI584610	1.0477	0.0629529	0.808985	0.0396162	0.937429	0.0969415	0.0424	ENSDART00000150595	ENSDARG00000096174	16:5198847-5200305	-1	Dr.136163	CT641343
AI942574	0.973286	0.0698567	0.723978	0.0310944	0.804775	0.0734437	0.0424	ENSDART00000057174	ENSDARG00000039142	2:20763673-20771677	1	Dr.76631	AI384735	ZDB-GENE-030131-8448	arpc5a	actin related protein 2/3 complex, subunit 5A	actin related protein 2/3 complex, subunit 5	ARPC5	10092
AW171339	0.959745	0.122047	0.554002	0.0537226	0.591306	0.213963	0.0424
AW342944	0.990571	0.0993786	0.634516	0.0577157	0.782993	0.0935197	0.0424	ENSDART00000109055	ENSDARG00000077769	7:53097855-53103912	-1	Dr.80388	AW127975	ZDB-GENE-030131-5596	wu:fi05d05
AW343766	0.955793	0.0780151	1.37576	0.0998175	1.03894	0.120136	0.0424	ENSDART00000132653	ENSDARG00000077650	21:18753916-18936724	1	Dr.22576	AW343766	ZDB-GENE-030131-7450	tnks	tankyrase, TRF1-interacting ankyrin-related ADP-ribose polymerase	tankyrase, TRF1-interacting ankyrin-related ADP-ribose polymerase	TNKS	8658
AW567517	1.32604	0.334806	0.506751	0.0841164	0.796343	0.155492	0.0424					Dr.105965	CT700001	ZDB-GENE-030131-3711	wu:fc50e08
AY050509	0.950141	0.12682	1.79552	0.212787	1.14919	0.146775	0.0424	ENSDART00000009892	ENSDARG00000018967	15:34013769-34141669	-1	Dr.88576	AY050509	ZDB-GENE-030904-5	gabbr1a	gamma-aminobutyric acid (GABA) B receptor, 1a	gamma-aminobutyric acid (GABA) B receptor, 1	GABBR1	2550
BE201646	1.01734	0.220622	2.54717	0.250235	1.40541	0.174159	0.0424	ENSDART00000033630	ENSDARG00000022772	5:26240685-26381340	-1	Dr.40515	BE201646	ZDB-GENE-060526-3	si:ch211-106a19.1
BE202228	0.992141	0.130483	1.98407	0.272261	1.39943	0.126763	0.0424	ENSDART00000015820	ENSDARG00000009499	20:26343298-26388380	1	Dr.155720	BE202228	ZDB-GENE-030131-4172	syne1a	spectrin repeat containing, nuclear envelope 1a	spectrin repeat containing, nuclear envelope 1	SYNE1	23345
BI534261	0.994836	0.0477364	1.31409	0.0840504	1.09455	0.0967748	0.0424					Dr.76212	AI330444	ZDB-GENE-040801-142	naa50	N(alpha)-acetyltransferase 50, NatE catalytic subunit	N(alpha)-acetyltransferase 50, NatE catalytic subunit	NAA50	80218
BI865738	0.887114	0.109581	1.49317	0.146212	1.50484	0.280839	0.0424					Dr.84413	BI865738
BI877949	1.06514	0.0862616	0.627566	0.0732983	0.8566	0.122726	0.0424	ENSDART00000139997	ENSDARG00000078384	22:2272419-2278033	1	Dr.83739	BI877949	ZDB-GENE-040426-1577	guca1e	guanylate cyclase activator 1e	guanylate cyclase activator 1A	GUCA1A	2978
BI878754	1.05806	0.0906823	1.74167	0.179847	1.0851	0.0862914	0.0424	ENSDART00000125042	ENSDARG00000068157	5:31130155-31147397	-1	Dr.83090	BI887304	ZDB-GENE-040724-44	ehmt1a	euchromatic histone-lysine N-methyltransferase 1a	euchromatic histone-lysine N-methyltransferase 1	EHMT1	79813
BI890456	0.867919	0.128939	1.61546	0.190549	2.07631	0.343957	0.0424	ENSDART00000112538	ENSDARG00000078533	11:292671-295809	-1	Dr.150982	NM_213049	ZDB-GENE-040426-1993	poc1a	POC1 centriolar protein homolog A (Chlamydomonas)	POC1 centriolar protein homolog A (Chlamydomonas)	POC1A	25886
BI892004	1.06832	0.165215	0.348962	0.10044	0.522915	0.0400773	0.0424	ENSDART00000026295	ENSDARG00000011545	7:27046660-27129626	1	Dr.132395	AW058995	ZDB-GENE-040426-1332	arrb2b	arrestin, beta 2b	arrestin, beta 2	ARRB2	409
BI980261	1.08725	0.090043	0.653643	0.0722384	0.819051	0.263382	0.0424	ENSDART00000101152	ENSDARG00000069476	15:19200783-19212158	1	Dr.67738	BM156745	ZDB-GENE-061013-323	spint2	serine peptidase inhibitor, Kunitz type, 2	serine peptidase inhibitor, Kunitz type, 2	SPINT2	10653
BI980672	0.941643	0.0859195	0.491606	0.0757755	0.600371	0.150029	0.0424	ENSDART00000126780	ENSDARG00000036282	13:9518928-9533143	-1	Dr.76572	EB921104	ZDB-GENE-030131-2513	rnaset2	ribonuclease T2	ribonuclease T2	RNASET2	8635
BM023802	1.01794	0.0451251	0.436905	0.096437	0.612847	0.125217	0.0424					Dr.133752	BM023802
BM182470	1.05274	0.138858	1.84589	0.143469	1.14438	0.175299	0.0424	ENSDART00000088329	ENSDARG00000061737	11:28797179-28927292	-1	Dr.79706	BM182470	ZDB-GENE-061110-100	zgc:154079
BM187492	1.08563	0.0541573	0.866865	0.0397133	1.01032	0.0783707	0.0424
NP11ENSDARG00000034689	1.05264	0.0744512	0.717942	0.062664	0.929098	0.159828	0.0424
BG307558	0.903496	0.0627856	1.20026	0.0592933	0.932952	0.123816	0.0427	ENSDART00000098476	ENSDARG00000051854	7:56781782-56793875	1	Dr.105738	AW344219	ZDB-GENE-070111-1	cdt1	chromatin licensing and DNA replication factor 1	chromatin licensing and DNA replication factor 1	CDT1	81620
AF144691	0.997946	0.0456603	1.41123	0.137012	0.982945	0.133724	0.0439	ENSDART00000127159	ENSDARG00000041381	18:15250066-15271601	-1	Dr.81323	BG737301	ZDB-GENE-000509-2	arntl2	aryl hydrocarbon receptor nuclear translocator-like 2	aryl hydrocarbon receptor nuclear translocator-like 2	ARNTL2	56938
AF336123	0.958811	0.0637963	1.22753	0.0683892	1.09351	0.150422	0.0439	ENSDART00000084055	ENSDARG00000060004	9:13628542-13631269	-1	Dr.154715	FP109844
AI437336	1.04114	0.109365	0.666603	0.0803584	1.35014	0.618289	0.0439	ENSDART00000129705	ENSDARG00000016086	3:40684997-40763139	-1	Dr.76814	AI437336	ZDB-GENE-040426-2744	smurf1
AI444200	0.980702	0.164475	1.67035	0.142083	1.108	0.120513	0.0439					Dr.76720	BI673582	ZDB-GENE-030131-368	wu:fb24e03
AI584430	1.04377	0.0867822	1.44519	0.113399	1.0049	0.102136	0.0439	ENSDART00000018083	ENSDARG00000020625	6:31078227-31120674	1	Dr.134606	EB764321
AI641466	1.01229	0.123317	0.563879	0.082287	0.590649	0.221324	0.0439	ENSDART00000084598	ENSDARG00000070097	7:10089247-10103115	1	Dr.132893	AI641466
AI793508	0.984232	0.0849364	1.44151	0.129245	1.44947	0.182428	0.0439	ENSDART00000144360	ENSDARG00000014101	13:40632536-40650374	-1	Dr.41107	AI793508	ZDB-GENE-050506-147	pyroxd2	pyridine nucleotide-disulphide oxidoreductase domain 2	pyridine nucleotide-disulphide oxidoreductase domain 2	PYROXD2	84795
AI878794	1.01822	0.0965999	1.4707	0.13915	1.23797	0.147395	0.0439	ENSDART00000138503	ENSDARG00000052215	3:47625639-47637219	1	Dr.72357	AI878794	ZDB-GENE-060825-228	btr02
AI883502	1.02825	0.0849257	1.49819	0.149803	1.2666	0.144313	0.0439	ENSDART00000141559	ENSDARG00000014287	19:5697139-5715883	1	Dr.78412	AI629166	ZDB-GENE-040704-27	eno2	enolase 2	enolase 2 (gamma, neuronal)	ENO2	2026
AI942691	0.917929	0.087481	1.38868	0.155036	1.28501	0.165302	0.0439	ENSDART00000135192	ENSDARG00000004748	3:39467970-39483264	-1	Dr.77547	EB989111	ZDB-GENE-040801-33	zgc:100868
AI942747	1.02987	0.125738	2.30686	0.588349	1.28589	0.263418	0.0439
AI943058	1.02239	0.0735899	1.34925	0.0943203	1.2061	0.0945807	0.0439					Dr.79481	AI943058	ZDB-GENE-030131-4229	wu:fc83g02
AI957519	0.998808	0.0706593	0.725297	0.0525762	0.922173	0.140803	0.0439					Dr.76170	GO942416	ZDB-GENE-040426-710	hnrpl	heterogeneous nuclear ribonucleoprotein L	heterogeneous nuclear ribonucleoprotein L	HNRNPL	3191
AI958242	1.18322	0.190711	0.643738	0.101549	0.872753	0.141354	0.0439					Dr.155556	AW175570	ZDB-GENE-030131-6153	tep1	telomerase-associated protein 1	telomerase-associated protein 1	TEP1	7011
AI958253	1.02445	0.118055	1.47671	0.0812446	0.978353	0.117226	0.0439	ENSDART00000135669	ENSDARG00000021184	16:34127784-34136628	-1	Dr.30455	EB887150	ZDB-GENE-040923-2	rbfox1l
AI959157	1.1821	0.217283	0.629693	0.0571861	0.820319	0.159046	0.0439	ENSDART00000126490	ENSDARG00000051800	25:29507166-29535402	-1	Dr.160078	EE202003
AI974149	1.06281	0.0838011	0.755426	0.0658095	1.2207	0.113739	0.0439					Dr.75177	BG308144	ZDB-GENE-990415-248	brd2a	bromodomain-containing 2a	bromodomain-containing 2	BRD2	6046
AI974191	1.01765	0.109357	1.52514	0.153587	1.73329	0.566949	0.0439	ENSDART00000079930	ENSDARG00000076271	1:11180888-11184203	1	Dr.105092	EB797528	ZDB-GENE-040419-2	mtp
AW018737	0.975316	0.0793902	0.679394	0.065723	0.863794	0.119927	0.0439	ENSDART00000122695	ENSDARG00000003208	13:8916113-8923777	1	Dr.132543	AI878447
AW019173	1.03219	0.295118	0.43677	0.0469322	0.739625	0.271355	0.0439	ENSDART00000102681	ENSDARG00000078619	7:7457931-7473128	1	Dr.105888	BE557142	ZDB-GENE-040426-2553	pnp5a
AW077282	1.11759	0.131722	0.653256	0.0815583	0.944524	0.0712779	0.0439	ENSDART00000088928	ENSDARG00000061929	24:31197613-31210562	-1	Dr.76765	EE201050	ZDB-GENE-060929-180	zgc:153980
AW077675	0.996382	0.0526922	1.23818	0.0568379	1.17275	0.0717313	0.0439	ENSDART00000002463	ENSDARG00000008765	20:14704079-14720732	1	Dr.22387	CK688784	ZDB-GENE-040426-1302	tmed5	transmembrane emp24 protein transport domain containing 5	transmembrane emp24 protein transport domain containing 5	TMED5	50999
AW077762	1.0591	0.0612406	0.725992	0.0795768	0.799655	0.122287	0.0439					Dr.148498	AI667065	ZDB-GENE-030131-3370	wu:fc37b12
AW116584	1.10288	0.196803	0.550915	0.0784015	0.63257	0.078749	0.0439	ENSDART00000044411	ENSDARG00000053326	2:53090568-53178564	-1
AW116717	0.930382	0.182465	0.497697	0.0535653	0.548546	0.0669792	0.0439					Dr.7839	CT599228	ZDB-GENE-030131-2796	wu:fc18a05
AW128274	0.776253	0.123988	1.37772	0.174199	1.29437	0.117914	0.0439	ENSDART00000113899	ENSDARG00000076552	21:14292454-14305569	-1	Dr.154592	EV556534
AW153491	0.952449	0.051043	1.24968	0.0862721	1.03182	0.101784	0.0439	ENSDART00000109843	ENSDARG00000076002	25:24127121-24176085	1
AW173992	0.936563	0.105505	1.43111	0.144527	1.70273	0.217226	0.0439	ENSDART00000016658	ENSDARG00000014572	4:16775192-16793192	-1	Dr.75843	EB877737	ZDB-GENE-030131-1325	chpt1	choline phosphotransferase 1	choline phosphotransferase 1	CHPT1	56994
AW422164	0.976821	0.0828085	1.38748	0.110771	1.05976	0.0796799	0.0439	ENSDART00000032195	ENSDARG00000029768	12:12762306-12869701	1	Dr.106859	EB909175	ZDB-GENE-080220-45	zgc:171432
AW595123	0.989015	0.0789785	0.695621	0.0541223	0.664426	0.106284	0.0439	ENSDART00000087065	ENSDARG00000061226	12:35487183-35531581	-1	Dr.159431	AW595123
AW826836	1.0149	0.0827929	1.63677	0.22639	1.06745	0.18696	0.0439	ENSDART00000054736	ENSDARG00000037588	23:17826509-17828066	-1	Dr.44149	BI318409	ZDB-GENE-050913-22	bhlhe23	basic helix-loop-helix family, member e23	basic helix-loop-helix family, member e23	BHLHE23	128408
BE016150	0.973209	0.0484093	0.784636	0.0412439	0.823007	0.0855712	0.0439					Dr.88191	CT645865	ZDB-GENE-070816-2	adamtsl7
BE605273	1.01737	0.0668114	1.57718	0.178782	1.29568	0.108835	0.0439	ENSDART00000060255	ENSDARG00000025977	15:27983464-28026609	-1	Dr.1479	CT619507	ZDB-GENE-030131-8485	blmh	bleomycin hydrolase	bleomycin hydrolase	BLMH	642
BE605604	0.933891	0.124874	0.425005	0.102652	0.880892	0.307089	0.0439					Dr.104799	AW233583	ZDB-GENE-030131-8492	wu:fb13d05
BG302614	0.949901	0.19931	2.06628	0.325848	1.6577	0.177019	0.0439
BG303239	0.975066	0.153536	1.67217	0.19259	1.46696	0.372259	0.0439	ENSDART00000058174	ENSDARG00000039784	Zv9_NA266:25296-34378	1	Dr.8991	CB351937	ZDB-GENE-030131-6401	toporsa	topoisomerase I binding, arginine/serine-rich a	topoisomerase I binding, arginine/serine-rich	TOPORS	10210
BG303835	0.907181	0.189104	0.326717	0.097156	0.387195	0.0990102	0.0439	ENSDART00000009500	ENSDARG00000009336	5:36167263-36193400	1	Dr.143213	BI878126	ZDB-GENE-030131-2755	WITHDRAWN:wu:fc17c12
BG727498	1.00549	0.0416528	0.75116	0.0660765	0.832919	0.116423	0.0439	ENSDART00000090175	ENSDARG00000040332	9:19691604-19710368	-1	Dr.135830	CT594060
BG883878	1.00037	0.0785787	0.686559	0.0716299	0.862189	0.0514591	0.0439	ENSDART00000074400	ENSDARG00000052536	5:58360045-58373731	-1	Dr.159520	AI588443	ZDB-GENE-030131-1506	tia1	cytotoxic granule-associated RNA binding protein 1	TIA1 cytotoxic granule-associated RNA binding protein	TIA1	7072
BG985485	1.1038	0.144552	1.85051	0.212583	1.03139	0.175118	0.0439	ENSDART00000106659	ENSDARG00000033170	12:827494-833453	-1	Dr.75045	CD014349	ZDB-GENE-061117-5	sult2st2
BI350407	1.05378	0.263396	2.89389	0.849355	1.60646	0.514638	0.0439					Dr.79568	BI428805	ZDB-GENE-040426-2012	wdr24	WD repeat domain 24	WD repeat domain 24	WDR24	84219
BI428543	0.969669	0.0533545	0.696558	0.0622367	0.718637	0.0408223	0.0439	ENSDART00000009132	ENSDARG00000012688	19:6042298-6045806	1	Dr.75862	EV560037	ZDB-GENE-030131-956	eif1b	eukaryotic translation initiation factor 1B	eukaryotic translation initiation factor 1B	EIF1B	10289
BI670912	1.09136	0.226223	0.4798	0.107298	0.941553	0.359598	0.0439	ENSDART00000050308	ENSDARG00000034187	20:16783665-16815721	1	Dr.132819	EH482137	ZDB-GENE-030804-2	calm1b	calmodulin 1b	calmodulin 1 (phosphorylase kinase, delta)	CALM1	801
BI671282	1.09331	0.111155	0.628032	0.0989946	0.947325	0.0751995	0.0439
BI671843	1.11468	0.159613	0.59739	0.0956564	0.623777	0.0516752	0.0439					Dr.83397	CT667280
BI672346	1.01902	0.212256	1.96858	0.24322	2.38108	0.818172	0.0439					Dr.83435	EB920086	ZDB-GENE-070424-28	zgc:162239
BI841609	0.971607	0.0605325	0.741977	0.050653	0.87541	0.0610697	0.0439
BI842069	0.978573	0.0800243	1.4039	0.138811	1.25538	0.174574	0.0439	ENSDART00000149922	ENSDARG00000040009	20:23489189-23636541	1	Dr.119676	BI472297	ZDB-GENE-041014-252	si:dkey-90m5.1
BI845187	1.08121	0.113976	0.736155	0.0419013	0.584195	0.0793115	0.0439					Dr.12565	BM070969	ZDB-GENE-030131-6995	wu:fa12e08
BI867396	1.00234	0.140343	0.582065	0.0787837	0.729344	0.112714	0.0439					Dr.76611	AI384158	ZDB-GENE-030131-8471	wu:fb12g02
BI877823	1.09641	0.132445	0.623269	0.0905561	0.985364	0.479311	0.0439	ENSDART00000006867	ENSDARG00000020573	9:34367809-34388046	1	Dr.104653	EB966220	ZDB-GENE-030131-1565	ddx3	DEAD (Asp-Glu-Ala-Asp) box polypeptide 3	DEAD (Asp-Glu-Ala-Asp) box polypeptide 3, X-linked	DDX3X	1654
BI878583	0.749115	0.163468	0.389501	0.0433668	0.444758	0.0782958	0.0439	ENSDART00000083108	ENSDARG00000059646	8:24492067-24509673	1	Dr.74223	CT633092	ZDB-GENE-060810-17	nt5dc2	5'-nucleotidase domain containing 2	5'-nucleotidase domain containing 2	NT5DC2	64943
BI878753	0.789209	0.143949	0.38717	0.0534906	0.299937	0.0964251	0.0439	ENSDART00000125454	ENSDARG00000089050	17:21700057-21709731	-1	Dr.4937	AI544855	ZDB-GENE-030131-4696	wu:fd52f06
BI878917	1.03829	0.0786612	0.650187	0.086858	0.699777	0.0536919	0.0439	ENSDART00000016105	ENSDARG00000008224	7:44487091-44541982	-1	Dr.105959	AI793638
BI880069	0.949491	0.11278	0.583022	0.0613485	0.804028	0.15545	0.0439					Dr.82684	EB917384
BI880658	0.967249	0.0378027	0.791922	0.0393186	0.822801	0.086276	0.0439	ENSDART00000058695	ENSDARG00000040128	10:6234944-6238930	1	Dr.78194	BI709437	ZDB-GENE-040927-8	hint1
BI882603	0.973158	0.034249	0.762565	0.0471253	0.818524	0.112381	0.0439	ENSDART00000138379	ENSDARG00000070890	20:19008615-19015125	-1	Dr.102635	CT676725
BI886163	0.820704	0.223765	1.91804	0.278308	1.01528	0.187139	0.0439					Dr.24325	BI886163	ZDB-GENE-040426-1417	wdr77	WD repeat domain 77	WD repeat domain 77	WDR77	79084
BI888265	1.06452	0.112018	1.75999	0.238714	1.41222	0.156606	0.0439	ENSDART00000135032	ENSDARG00000092651	9:23010728-23017004	1	Dr.82342	BG303307	ZDB-GENE-081104-423	si:dkey-57a22.11
BI888915	1.02605	0.0815273	1.40449	0.0927005	1.2004	0.115148	0.0439	ENSDART00000149744	ENSDARG00000045401	24:17694937-17765417	1	Dr.37146	AL924675	ZDB-GENE-041114-176	mllt10	myeloid/lymphoid or mixed-lineage leukemia (trithorax homolog, Drosophila); translocated to, 10	myeloid/lymphoid or mixed-lineage leukemia (trithorax homolog, Drosophila); translocated to, 10	MLLT10	8028
BI890620	1.0521	0.168952	2.02098	0.291021	1.46015	0.217122	0.0439	ENSDART00000023388	ENSDARG00000008542	11:38876798-38885800	-1	Dr.104832	CO359918	ZDB-GENE-050417-217	yod1	YOD1 OTU deubiquinating enzyme 1 homolog (S. cerevisiae)	YOD1 OTU deubiquinating enzyme 1 homolog (S. cerevisiae)	YOD1	55432
BI980383	0.994293	0.067997	1.29755	0.0860741	1.09774	0.0870851	0.0439	ENSDART00000139180	ENSDARG00000094043	5:66529434-66538430	1	Dr.30538	BI980383	ZDB-GENE-041008-214	si:ch73-37h15.2
BI983604	0.961438	0.0924897	1.38701	0.0998172	1.15329	0.0732927	0.0439					Dr.85463	BM530007
BM036380	0.982493	0.156381	1.67255	0.149792	1.38757	0.128739	0.0439	ENSDART00000101740	ENSDARG00000037018	1:35203533-35317772	1	Dr.159916	BM036380
BM154337	1.00117	0.042351	0.780962	0.052751	0.85826	0.0799347	0.0439					Dr.123359	BM154337
BM182332	0.98475	0.102662	1.49846	0.155881	1.32285	0.163263	0.0439	ENSDART00000127841	ENSDARG00000057719	13:7644680-7668026	-1	Dr.73987	AI626460	ZDB-GENE-030131-6505	atl2	atlastin GTPase 2	atlastin GTPase 2	ATL2	64225
BM186244	1.23512	0.250343	0.63817	0.0730893	0.935114	0.422967	0.0439	ENSDART00000127386	ENSDARG00000017665	25:13941962-13960215	1	Dr.123334	EE214591
AW203092	1.20417	0.309176	0.405041	0.154126	0.692095	0.207759	0.044					Dr.140631	AW184080
BI888493	0.674225	0.199359	1.55444	0.107544	1.19575	0.224284	0.044	ENSDART00000038401	ENSDARG00000028096	10:15075411-15077355	-1	Dr.80149	AW059153	ZDB-GENE-091204-28	si:ch211-95j8.2
BI709849	0.99597	0.03649	0.743168	0.0654984	0.87198	0.0871964	0.0447					Dr.133718	BI709424
AB032725	0.89958	0.136442	1.44417	0.126909	1.24949	0.102648	0.0456	ENSDART00000039629	ENSDARG00000034668	19:9439193-9503211	-1	Dr.8323	EB959851	ZDB-GENE-000501-2	celf3a	cugbp, Elav-like family member 3a	CUGBP, Elav-like family member 3	CELF3	11189
AF362683	0.98719	0.149453	1.64838	0.198342	1.07208	0.150708	0.0456					Dr.83675	NM_131847	ZDB-GENE-010919-1	mitfb	microphthalmia-associated transcription factor b	microphthalmia-associated transcription factor	MITF	4286
BI845628	1.02534	0.0659459	0.746106	0.0708857	0.843775	0.0852225	0.0456
AI943028	1.29549	0.176226	0.753629	0.11663	0.7321	0.0841362	0.0462	ENSDART00000099601	ENSDARG00000068784	13:43794016-43812184	-1	Dr.5356	AI397361	ZDB-GENE-060929-716	zgc:153073
BE017513	1.04284	0.11022	1.85171	0.342528	1.12926	0.127586	0.0462					Dr.132821	AW233480
BI891382	1.05008	0.115232	1.61377	0.19177	1.11673	0.167475	0.0467	ENSDART00000124118	ENSDARG00000036820	8:27146808-27179441	1	Dr.106158	CD598658	ZDB-GENE-031006-9	mgll	monoglyceride lipase	monoglyceride lipase	MGLL	11343
BM187315	0.986375	0.03426	0.770571	0.0604874	0.728228	0.110589	0.0471	ENSDART00000129083	ENSDARG00000086201	14:1297024-1298049	1	Dr.89139	CT690598
AW077613	0.927049	0.0767152	0.630208	0.0738999	0.692954	0.150968	0.0472					Dr.122149	AW077632
BG727324	1.00735	0.0790648	0.782184	0.0395464	0.794411	0.0560469	0.0472
BI880593	1.19224	0.267332	2.2854	0.273516	2.09461	0.286983	0.0472	ENSDART00000141642	ENSDARG00000068716	10:38478325-38500678	1	Dr.82732	EB961118	ZDB-GENE-061027-344	cuedc1a	CUE domain containing 1a	CUE domain containing 1	CUEDC1	404093
AA495267	1.03501	0.0476204	0.850172	0.0481631	0.873003	0.0579736	0.0474					Dr.4035	AA495267	ZDB-GENE-040426-2122	zgc:65870
AF348959	0.968037	0.120593	0.651927	0.0535395	0.862887	0.0814804	0.0474	ENSDART00000033970	ENSDARG00000009549	23:21573133-21670989	1	Dr.54908	AF348959	ZDB-GENE-090313-341	ubr4	ubiquitin protein ligase E3 component n-recognin 4	ubiquitin protein ligase E3 component n-recognin 4	UBR4	23352
AW116933	0.911094	0.0598491	1.48336	0.243159	1.18851	0.194656	0.0481	ENSDART00000141577	ENSDARG00000059983	16:34506667-34511237	1	Dr.7628	AW154319	ZDB-GENE-070209-211	zufsp	zinc finger with UFM1-specific peptidase domain	zinc finger with UFM1-specific peptidase domain	ZUFSP	221302
AI331055	1.01643	0.0652442	0.790529	0.0551425	0.754042	0.0660178	0.0482	ENSDART00000108703	ENSDARG00000077934	11:209716-214312	-1	Dr.47346	EB764127	ZDB-GENE-030826-10	tegt
AI793532	0.999918	0.230276	2.01234	0.334647	1.2067	0.114179	0.0482					Dr.85245	FP146330	ZDB-GENE-060810-58	im:7155681
U66569	1.09429	0.0927997	0.846487	0.0346609	0.943354	0.0919709	0.0482	ENSDART00000027392	ENSDARG00000029764	10:45067612-45164042	-1	Dr.3182	EB897178	ZDB-GENE-980526-253	mef2ca	myocyte enhancer factor 2ca	MADS box transcription enhancer factor 2, polypeptide C (myocyte enhancer factor 2C)	MEF2C	4208
AI959376	1.09666	0.155193	0.690224	0.078106	0.636566	0.073082	0.0488	ENSDART00000144961	ENSDARG00000045306	24:25584284-25590905	-1	Dr.27305	AI477455	ZDB-GENE-040912-10	zgc:92111	zgc:92111	organic solute transporter alpha	OSTalpha	200931
AW116000	1.01907	0.0863943	0.749864	0.0614341	0.709436	0.149959	0.0488	ENSDART00000098759	ENSDARG00000068319	10:46475515-46484737	1	Dr.122337	FP107519
AW343567	0.937164	0.165593	1.65971	0.232783	0.915637	0.175383	0.0488	ENSDART00000064390	ENSDARG00000043854	20:3015679-3037424	-1	Dr.122372	AW343567
AW595163	1.02506	0.0553046	0.682528	0.0930563	0.697976	0.106984	0.0488					Dr.142266	AW566748	ZDB-GENE-030909-10	itgb1b	integrin, beta 1b	integrin, beta 1	ITGB1	3688
AW018470	1.01094	0.199046	1.75299	0.160228	3.08829	0.525331	0.051	ENSDART00000064003	ENSDARG00000043584	17:23437022-23439037	-1	Dr.92648	CO914517
AF038425	1.01253	0.0842	1.69546	0.303307	1.5246	0.179914	0.0527	ENSDART00000017977	ENSDARG00000014986	2:41563896-41583420	-1	Dr.75831	AW778539	ZDB-GENE-990415-9	acvr1l
L25273	0.922969	0.102683	1.39709	0.165991	0.905032	0.11392	0.0527	ENSDART00000129400	ENSDARG00000026531	10:29413530-29443235	-1	Dr.20912	CK704278	ZDB-GENE-990415-30	alcama	activated leukocyte cell adhesion molecule a	activated leukocyte cell adhesion molecule	ALCAM	214
BI891108	0.988747	0.0602626	1.46963	0.19928	1.23105	0.164491	0.0528	ENSDART00000045574	ENSDARG00000034138	5:23850898-23853557	1	Dr.141	BM083125	ZDB-GENE-030925-31	shisa2	shisa homolog 2 (Xenopus laevis)	shisa homolog 2 (Xenopus laevis)	SHISA2	387914
AW076610	1.0596	0.113257	0.624765	0.10792	0.604892	0.101102	0.0531					Dr.22311	AW076610
AI477611	1.02085	0.159513	2.28271	0.691864	1.51596	0.232395	0.0536					Dr.76981	AI477611
BI845517	0.916543	0.164651	0.538518	0.0650116	0.90006	0.108792	0.0536
AF012751	1.22747	0.236684	2.19468	0.326027	1.01518	0.206912	0.0555	ENSDART00000060122	ENSDARG00000025658	15:30653398-30655186	-1	Dr.75771	AF012751	ZDB-GENE-010308-19	or111-2
AI544693	1.04694	0.0665355	0.815984	0.0618663	0.863551	0.0524014	0.0555	ENSDART00000109346	ENSDARG00000079730	2:4011338-4016439	1	Dr.127394	CT725839
AI657806	0.858785	0.120957	1.37218	0.1787	0.925134	0.118959	0.0555	ENSDART00000131883	ENSDARG00000043818	12:22125113-22138758	1	Dr.21460	AI657806	ZDB-GENE-041001-137	si:ch211-119c20.2
AW171610	0.987136	0.258913	1.93004	0.203899	1.01356	0.133266	0.0555	ENSDART00000125430	ENSDARG00000090337	13:11761998-11775438	-1	Dr.105135	BI866693	ZDB-GENE-030131-9858	pprc1	peroxisome proliferator-activated receptor gamma, coactivator-related 1	peroxisome proliferator-activated receptor gamma, coactivator-related 1	PPRC1	23082
BM026879	1.04608	0.0480489	1.51211	0.19585	1.23348	0.192656	0.0555
BI474937	1.0398	0.0619821	1.37627	0.127308	0.959515	0.11795	0.0558					Dr.72278	BI474937	ZDB-GENE-071125-1	rhobtb2b
BI889658	1.00153	0.0615942	0.72617	0.0794489	0.670396	0.0698804	0.0558	ENSDART00000009838	ENSDARG00000019897	10:42726956-42764615	-1	Dr.18865	CT633736	ZDB-GENE-060421-5102	zgc:136875
BM095249	1.03902	0.089202	0.712188	0.0882948	0.641213	0.233465	0.0558	ENSDART00000022015	ENSDARG00000015823	15:18225151-18231532	1	Dr.4181	BM095249	ZDB-GENE-040426-2699	vps26b	vacuolar protein sorting 26 homolog B	vacuolar protein sorting 26 homolog B (yeast)	VPS26B	112936
AA658588	1.21734	0.20649	2.30883	0.49051	1.22244	0.158068	0.0563	ENSDART00000146430	ENSDARG00000041839	22:38090550-38148913	1	Dr.75971	EB918257	ZDB-GENE-031001-12	tsc22d2	TSC22 domain family 2	TSC22 domain family 2	TSC22D2	9819
AF153446	1.02404	0.0444364	0.840871	0.055524	0.83814	0.0865485	0.062	ENSDART00000149526	ENSDARG00000043317	20:22408091-22445415	-1	Dr.81312	AL916596	ZDB-GENE-980526-464	kita	kit receptor a	v-kit Hardy-Zuckerman 4 feline sarcoma viral oncogene homolog	KIT	3815
AI793521	1.03321	0.0551222	0.81664	0.0641952	0.827956	0.0688764	0.062					Dr.129056	CT598689
AA497153	1.12457	0.129184	1.55229	0.101752	1.27871	0.0742277	0.0622	ENSDART00000044859	ENSDARG00000015538	3:34319325-34330321	1	Dr.75339	EB917550	ZDB-GENE-040426-2273	znf207a	zinc finger protein 207, a	zinc finger protein 207	ZNF207	7756
AW232207	1.07085	0.227778	2.0823	0.42939	1.19077	0.0738466	0.0629
AW280411	0.963969	0.0631564	1.32278	0.142149	1.33531	0.0817661	0.0629	ENSDART00000146322	ENSDARG00000063141	22:12495876-12520643	1	Dr.155624	AW281112	ZDB-GENE-030131-7119	r3hdm1	R3H domain containing 1	R3H domain containing 1	R3HDM1	23518
BM183759	1.03024	0.0777196	1.36962	0.124852	1.58874	0.375727	0.0634	ENSDART00000150038	ENSDARG00000069910	1:34333825-34339502	1	Dr.159273	AL728493
BI472636	1.21441	0.210127	2.03776	0.295555	1.30368	0.124846	0.0646	ENSDART00000124987	ENSDARG00000040004	19:23421010-23483912	1	Dr.52379	AL918184	ZDB-GENE-060503-475	pkhd1l1	polycystic kidney and hepatic disease 1 (autosomal recessive)-like 1	polycystic kidney and hepatic disease 1 (autosomal recessive)-like 1	PKHD1L1	93035
AW128595	1.03262	0.115677	1.53057	0.189454	1.70179	0.275294	0.0657	ENSDART00000062666	ENSDARG00000007743	15:19317110-19323664	1	Dr.37800	AW078198	ZDB-GENE-041111-173	il15l
BI896327	0.882314	0.162157	0.487024	0.092811	0.480725	0.0702422	0.0659	ENSDART00000141498	ENSDARG00000022456	23:22968985-22971946	1	Dr.4724	AI106420	ZDB-GENE-030131-6048	eno1a	enolase 1a, (alpha)	enolase 1, (alpha)	ENO1	2023
BI889609	1.02384	0.104743	0.69459	0.0910437	0.640479	0.122731	0.0676	ENSDART00000114041	ENSDARG00000006487	7:34680138-34685691	-1	Dr.150357	AL727417	ZDB-GENE-050913-48	zgc:114130
BI889268	0.972517	0.138412	1.49241	0.181996	1.98228	0.187214	0.0686	ENSDART00000004181	ENSDARG00000017047	10:10704776-10748706	1	Dr.132883	BI889268	ZDB-GENE-050417-248	slc27a4	solute carrier family 27 (fatty acid transporter), member 4	solute carrier family 27 (fatty acid transporter), member 4	SLC27A4	10999
BI473509	1.39504	0.271366	2.71102	0.643413	3.49198	1.29291	0.0699	ENSDART00000030420	ENSDARG00000024815	11:20512273-20516215	-1	Dr.77515	BI473509	ZDB-GENE-030616-523	ogfrl2
BI670868	1.10378	0.243937	1.96362	0.27377	1.32594	0.0922885	0.0699
BI840708	0.99574	0.134852	1.41493	0.0908982	1.10395	0.106596	0.0699					Dr.123179	BI840708
BI882683	0.971132	0.044601	0.799089	0.0542146	0.797613	0.0617435	0.0699
AW777717	0.908671	0.1498	1.83618	0.517768	1.45921	0.206652	0.0702	ENSDART00000005296	ENSDARG00000020332	17:38422623-38423908	1	Dr.79439	AW777717	ZDB-GENE-030131-4340	nkx2.9
BE200801	1.01472	0.0465735	0.799	0.0709185	0.740645	0.100327	0.0718					Dr.122550	BE200801
AB051678	0.96434	0.100756	1.73166	0.417126	1.39064	0.130449	0.0731	ENSDART00000103229	ENSDARG00000032485	16:25409913-25429162	1	Dr.83331	AB055674	ZDB-GENE-011108-1	efna3b	ephrin A3b	ephrin-A3	EFNA3	1944
BM530206	0.967947	0.0445551	0.729018	0.0792936	0.707871	0.069392	0.0731	ENSDART00000147842	ENSDARG00000094004	9:1361605-1365119	1	Dr.134848	BC155220	ZDB-GENE-050208-786	si:dkey-1b17.11
AW282135	1.11395	0.252645	1.97581	0.25251	1.2129	0.131768	0.0742	ENSDART00000099693	ENSDARG00000068831	9:56709490-56718790	-1	Dr.155645	AW282135	ZDB-GENE-030131-8249	wu:fj62g02
AI626591	1.02443	0.148332	1.49554	0.114685	0.925577	0.132734	0.0746					Dr.21431	AI626591
AW116946	1.14532	0.136833	1.60703	0.150045	1.1587	0.119564	0.075	ENSDART00000076009	ENSDARG00000060594	17:37395454-37420328	1	Dr.29120	CD605647	ZDB-GENE-041111-204	hadhab	hydroxyacyl-Coenzyme A dehydrogenase/3-ketoacyl-Coenzyme A thiolase/enoyl-Coenzyme A hydratase, alpha subunit b	hydroxyacyl-CoA dehydrogenase/3-ketoacyl-CoA thiolase/enoyl-CoA hydratase (trifunctional protein), alpha subunit	HADHA	3030
BI430190	0.989497	0.120801	0.704293	0.0645501	1.27204	0.271144	0.075	ENSDART00000112345	ENSDARG00000074676	16:1225187-1237821	-1	Dr.82813	BI430190
BI842933	0.876208	0.142234	0.5019	0.101395	0.482951	0.0681616	0.075	ENSDART00000105931	ENSDARG00000075718	16:49557011-49560548	1	Dr.79973	BF717719	ZDB-GENE-030131-4678	rpz5
BM181668	1.00253	0.106534	1.3237	0.0787419	0.7036	0.306199	0.075					Dr.159843	BI878155
AW280016	1.06542	0.220706	2.80619	1.15573	3.35826	2.47097	0.0759	ENSDART00000052805	ENSDARG00000036345	7:25881931-25886746	-1	Dr.81087	AW280016	ZDB-GENE-040426-2775	ftsjd1	FtsJ methyltransferase domain containing 1	FtsJ methyltransferase domain containing 1	FTSJD1	55783
BI427755	1.01964	0.0716462	0.778131	0.0763271	0.755089	0.0617776	0.0789					Dr.159735	CN511537
U42393	1.07817	0.0868679	1.8343	0.41647	1.80281	0.468842	0.0789
BI846672	0.987733	0.120029	0.541315	0.139788	1.16035	0.103896	0.0809	ENSDART00000073518	ENSDARG00000051827	7:55697470-55785431	-1	Dr.40663	BG728029	ZDB-GENE-040724-9	si:busm1-70b1.2
BI476513	0.912903	0.135429	1.34331	0.13711	0.857785	0.11098	0.0825					Dr.7819	AW233640	ZDB-GENE-030131-7895	wu:fj39e03
AI816701	0.980256	0.0651257	1.28111	0.130646	0.881287	0.0866919	0.0851	ENSDART00000006805	ENSDARG00000019258	19:35303951-35426704	-1	Dr.132530	CD759941	ZDB-GENE-040426-2069	elmo1	engulfment and cell motility 1 (ced-12 homolog, C. elegans)	engulfment and cell motility 1	ELMO1	9844
AI497477	0.950265	0.111527	1.47459	0.252727	2.43245	0.454091	0.0861	ENSDART00000139070	ENSDARG00000093619	22:15482360-15487773	1	Dr.36001	AI497477	ZDB-GENE-030131-1135	sult3st2
BE200673	0.975124	0.146957	0.613781	0.100334	0.590293	0.0754889	0.0861	ENSDART00000044128	ENSDARG00000034916	9:3278943-3310741	1	Dr.104658	BE201275	ZDB-GENE-040912-99	hat1	histone acetyltransferase 1	histone acetyltransferase 1	HAT1	8520
AI721360	1.01155	0.0423842	0.791967	0.0794239	0.808519	0.0626811	0.0872	ENSDART00000150732	ENSDARG00000094017	4:39381777-39398900	1	Dr.111964	EH519502
U89295	0.983258	0.182134	1.71126	0.346689	1.74315	0.220577	0.0882	ENSDART00000105774	ENSDARG00000020080	24:28418728-28585492	1	Dr.75760	AL730068	ZDB-GENE-990415-58	ek1
BM036992	1.00129	0.0931661	0.783545	0.0543873	0.982819	0.0372736	0.092	ENSDART00000097535	ENSDARG00000067720	12:50542145-50549329	1	Dr.156398	CK146064
BM183855	1.03047	0.108872	0.77002	0.0699161	0.59473	0.10758	0.092	ENSDART00000045607	ENSDARG00000005446	25:5016485-5038286	1	Dr.75286	CD585935	ZDB-GENE-051120-174	ckap5	cytoskeleton associated protein 5	cytoskeleton associated protein 5	CKAP5	9793
AI964223	0.8407	0.199131	1.48432	0.251013	2.06756	0.339455	0.0924	ENSDART00000123090	ENSDARG00000086370	19:11954418-11958954	-1	Dr.77157	EB877764	ZDB-GENE-010724-18	apoea	apolipoprotein Ea	apolipoprotein E	APOE	348
AW233044	0.962318	0.0547656	0.776	0.0642773	0.634638	0.10984	0.0924	ENSDART00000065652	ENSDARG00000077069	13:23210793-23214666	-1	Dr.24158	EV563158	ZDB-GENE-030131-7127	srgn	serglycin	serglycin	SRGN	5552
BI891492	1.02871	0.0706633	0.763023	0.0930636	0.755779	0.0818236	0.0924	ENSDART00000128153	ENSDARG00000029248	2:8433697-8447444	1	Dr.159479	AI444219
BI982955	0.963677	0.142904	1.39689	0.139802	0.761038	0.210962	0.0943					Dr.140857	BM024110
AF448140	0.983461	0.161246	1.43946	0.134405	2.07272	0.327426	0.0981	ENSDART00000102459	ENSDARG00000070038	15:5697322-5708818	-1	Dr.77311	EB875301	ZDB-GENE-020320-2	rbp2a	retinol binding protein 2a, cellular	retinol binding protein 2, cellular	RBP2	5948
BI672308	0.750501	0.14635	0.409304	0.0998643	0.365123	0.0331143	0.0981	ENSDART00000073846	ENSDARG00000052074	7:53271586-53280247	1	Dr.45962	BI672833
AF164512	1.09809	0.0795597	1.53325	0.219924	1.51158	0.16953	0.0994					Dr.81313	BC162213	ZDB-GENE-000210-31	vdra	vitamin D receptor a	vitamin D (1,25- dihydroxyvitamin D3) receptor	VDR	7421

## Sheet: S2F_In_ExcVsDef
Systematic ID	Control		Deficiency		Excess		t-test	ENSEMBL				NBCI		ZFIN			Human Orthologues
	Normalized	SE	Normalized	SE	Normalized	SE	p	Transcript	Gene	map	sense	Unigene	gb	ID	Symbol	Description	Description	Symbol	Entrez Gene ID
AW184187	1.01997	0.202801	0.735318	0.193263	8.03595	2.20217	0.00115	ENSDART00000061007	ENSDARG00000041623	18:17193795-17195147	1	Dr.121290	BQ261526	ZDB-GENE-030131-4174	mt2
AA658588	1.21734	0.20649	2.30883	0.49051	1.22244	0.158068	0.0882	ENSDART00000146430	ENSDARG00000041839	22:38090550-38148913	1	Dr.75971	EB918257	ZDB-GENE-031001-12	tsc22d2	TSC22 domain family 2	TSC22 domain family 2	TSC22D2	9819
AF012751	1.22747	0.236684	2.19468	0.326027	1.01518	0.206912	0.0882	ENSDART00000060122	ENSDARG00000025658	15:30653398-30655186	-1	Dr.75771	AF012751	ZDB-GENE-010308-19	or111-2
AF036326	0.951405	0.0942218	0.79221	0.0676149	1.40463	0.274498	0.0882	ENSDART00000051222	ENSDARG00000035350	5:39454959-39457905	1	Dr.75811	AJ237750	ZDB-GENE-980526-110	ins	preproinsulin	insulin	INS	3630
AF121796	0.957327	0.133705	1.05804	0.128737	1.52097	0.0827561	0.0882	ENSDART00000024328	ENSDARG00000012903	1:13317179-13327647	1	Dr.113486	CF265652	ZDB-GENE-000524-1	slc34a2a
AF184244	0.954417	0.055644	1.12215	0.117855	0.781372	0.0578457	0.0882	ENSDART00000098443	ENSDARG00000038695	2:36845430-36855002	-1	Dr.124830	CD598595
AF397016	1.0881	0.0625256	1.10902	0.0680711	0.855626	0.0596169	0.0882	ENSDART00000135831	ENSDARG00000013415	16:32829070-32833296	-1	Dr.10311	AL920741	ZDB-GENE-020424-3	lmna	lamin A	lamin A/C	LMNA	4000
AI353648	1.18611	0.196355	1.064	0.15448	2.07413	0.386446	0.0882	ENSDART00000133884	ENSDARG00000053858	17:37555497-37562965	-1	Dr.39013	AA566771	ZDB-GENE-041111-1	crip1
AI444200	0.980702	0.164475	1.67035	0.142083	1.108	0.120513	0.0882					Dr.76720	BI673582	ZDB-GENE-030131-368	wu:fb24e03
AI461323	0.976499	0.0744475	1.25715	0.161271	0.836081	0.0615512	0.0882	ENSDART00000022348	ENSDARG00000007430	5:66656224-66660563	1	Dr.23693	AI461323	ZDB-GENE-041114-172	zgc:101606
AI477584	0.883146	0.250388	0.882613	0.213392	2.10624	0.528936	0.0882					Dr.148457	AI477584
AI497222	1.04111	0.159918	0.928224	0.148104	1.71535	0.223981	0.0882	ENSDART00000140807	ENSDARG00000010541	3:50204093-50218501	1	Dr.114476	EB878742	ZDB-GENE-040912-22	zgc:92161
AI558350	1.04072	0.0742461	0.96603	0.0557246	1.43762	0.144073	0.0882
AI584430	1.04377	0.0867822	1.44519	0.113399	1.0049	0.102136	0.0882	ENSDART00000018083	ENSDARG00000020625	6:31078227-31120674	1	Dr.134606	EB764321
AI626591	1.02443	0.148332	1.49554	0.114685	0.925577	0.132734	0.0882					Dr.21431	AI626591
AI721573	0.94583	0.217251	1.42495	0.205816	0.799263	0.091108	0.0882					Dr.90938	AI721573
AI793532	0.999918	0.230276	2.01234	0.334647	1.2067	0.114179	0.0882					Dr.85245	FP146330	ZDB-GENE-060810-58	im:7155681
AI816701	0.980256	0.0651257	1.28111	0.130646	0.881287	0.0866919	0.0882	ENSDART00000006805	ENSDARG00000019258	19:35303951-35426704	-1	Dr.132530	CD759941	ZDB-GENE-040426-2069	elmo1	engulfment and cell motility 1 (ced-12 homolog, C. elegans)	engulfment and cell motility 1	ELMO1	9844
AI942866	1.40987	0.584235	0.687988	0.131939	1.4094	0.256335	0.0882					Dr.104562	AI942866
AI942954	0.915699	0.0445211	0.811349	0.0695477	0.553349	0.0673993	0.0882	ENSDART00000019989	ENSDARG00000011055	13:2206942-2220565	-1	Dr.79462	CD606203	ZDB-GENE-030131-4194	fbxo9	F-box protein 9	F-box protein 9	FBXO9	26268
AI958253	1.02445	0.118055	1.47671	0.0812446	0.978353	0.117226	0.0882	ENSDART00000135669	ENSDARG00000021184	16:34127784-34136628	-1	Dr.30455	EB887150	ZDB-GENE-040923-2	rbfox1l
AI965321	1.13264	0.259941	1.35366	0.241078	0.737151	0.108518	0.0882	ENSDART00000133217	ENSDARG00000061600	5:27410071-27458164	1	Dr.76371	AI331429	ZDB-GENE-030131-2179	tmem2	transmembrane protein 2	transmembrane protein 2	TMEM2	23670
AI974149	1.06281	0.0838011	0.755426	0.0658095	1.2207	0.113739	0.0882					Dr.75177	BG308144	ZDB-GENE-990415-248	brd2a	bromodomain-containing 2a	bromodomain-containing 2	BRD2	6046
AW018470	1.01094	0.199046	1.75299	0.160228	3.08829	0.525331	0.0882	ENSDART00000064003	ENSDARG00000043584	17:23437022-23439037	-1	Dr.92648	CO914517
AW116204	1.02218	0.162244	1.09833	0.0792893	1.60754	0.188903	0.0882	ENSDART00000143183	ENSDARG00000035507	5:31364918-31370371	1	Dr.79241	AL919645	ZDB-GENE-030131-3973	si:ch211-89p1.3
AW128470	1.03723	0.124759	1.00002	0.0881778	1.48509	0.160557	0.0882	ENSDART00000050847	ENSDARG00000035120	5:69158109-69190378	1	Dr.76732	EB916638	ZDB-GENE-030131-340	gldc	glycine dehydrogenase (decarboxylating)	glycine dehydrogenase (decarboxylating)	GLDC	2731
AW171233	0.896266	0.112846	0.834534	0.11754	1.36459	0.151126	0.0882	ENSDART00000122138	ENSDARG00000091260	2:427011-447851	1
AW171610	0.987136	0.258913	1.93004	0.203899	1.01356	0.133266	0.0882	ENSDART00000125430	ENSDARG00000090337	13:11761998-11775438	-1	Dr.105135	BI866693	ZDB-GENE-030131-9858	pprc1	peroxisome proliferator-activated receptor gamma, coactivator-related 1	peroxisome proliferator-activated receptor gamma, coactivator-related 1	PPRC1	23082
AW232570	1.20071	0.197011	1.54695	0.219778	0.849723	0.149615	0.0882	ENSDART00000015277	ENSDARG00000006207	6:42269719-42272629	1	Dr.79923	AL921931	ZDB-GENE-040912-60	gpx1b	glutathione peroxidase 1b	glutathione peroxidase 1	GPX1	2876
AW281444	0.846535	0.139642	0.702821	0.0534296	1.02574	0.116627	0.0882	ENSDART00000016112	ENSDARG00000013804	15:28465241-28471917	1	Dr.45282	AI616855	ZDB-GENE-030131-5206	capns1b	calpain, small subunit 1 b	calpain, small subunit 1	CAPNS1	826
AW282135	1.11395	0.252645	1.97581	0.25251	1.2129	0.131768	0.0882	ENSDART00000099693	ENSDARG00000068831	9:56709490-56718790	-1	Dr.155645	AW282135	ZDB-GENE-030131-8249	wu:fj62g02
AW343567	0.937164	0.165593	1.65971	0.232783	0.915637	0.175383	0.0882	ENSDART00000064390	ENSDARG00000043854	20:3015679-3037424	-1	Dr.122372	AW343567
AW419582	1.04911	0.0712944	1.11217	0.0482194	0.828322	0.0684277	0.0882					Dr.37082	AW419582	ZDB-GENE-061201-51	rilpl1	Rab interacting lysosomal protein-like 1	Rab interacting lysosomal protein-like 1	RILPL1	353116
AY050509	0.950141	0.12682	1.79552	0.212787	1.14919	0.146775	0.0882	ENSDART00000009892	ENSDARG00000018967	15:34013769-34141669	-1	Dr.88576	AY050509	ZDB-GENE-030904-5	gabbr1a	gamma-aminobutyric acid (GABA) B receptor, 1a	gamma-aminobutyric acid (GABA) B receptor, 1	GABBR1	2550
BE015661	1.07875	0.126127	1.27486	0.0513678	1.00904	0.0699918	0.0882
BE201646	1.01734	0.220622	2.54717	0.250235	1.40541	0.174159	0.0882	ENSDART00000033630	ENSDARG00000022772	5:26240685-26381340	-1	Dr.40515	BE201646	ZDB-GENE-060526-3	si:ch211-106a19.1
BE605950	1.10388	0.269483	1.19924	0.195441	0.615033	0.118967	0.0882	ENSDART00000029308	ENSDARG00000028507	8:13623711-13676538	1	Dr.82238	CB365551	ZDB-GENE-030131-7209	itgb4	integrin, beta 4	integrin, beta 4	ITGB4	3691
BE693163	0.902706	0.163836	1.0942	0.0795067	0.79604	0.0453827	0.0882	ENSDART00000138145	ENSDARG00000016304	1:112082-116398	1	Dr.76564	BI671198	ZDB-GENE-040426-1746	tfdp1b	transcription factor Dp-1, b	transcription factor Dp-1	TFDP1	7027
BF938357	0.880983	0.0985472	0.683636	0.0482438	0.889458	0.0445318	0.0882	ENSDART00000113679	ENSDARG00000078500	16:15966389-15980605	1	Dr.82719	BQ076608	ZDB-GENE-051129-2	dap3
BG305809	1.04931	0.0971591	1.21212	0.211541	0.693986	0.0634076	0.0882	ENSDART00000003143	ENSDARG00000018742	12:25551415-25562994	1	Dr.75389	BM186080	ZDB-GENE-100316-4	psme4b	proteasome (prosome, macropain) activator subunit 4b	proteasome (prosome, macropain) activator subunit 4	PSME4	23198
BG307251	1.02685	0.0919549	1.25772	0.0785767	0.866564	0.0683391	0.0882	ENSDART00000050221	ENSDARG00000030694	4:5113375-5120584	-1	Dr.80286	AW280928	ZDB-GENE-020419-11	atp6v1e1b	ATPase, H+ transporting, lysosomal, V1 subunit E isoform 1b	ATPase, H transporting, lysosomal 31kDa, V1 subunit E1	ATP6V1E1	529
BG308366	0.972651	0.104232	1.14881	0.106217	0.812483	0.0669951	0.0882	ENSDART00000051607	ENSDARG00000035596	5:22227216-22229410	-1	Dr.150871	BM530714
BG799059	0.847242	0.20059	0.543734	0.0658042	0.825989	0.0646505	0.0882
BG985485	1.1038	0.144552	1.85051	0.212583	1.03139	0.175118	0.0882	ENSDART00000106659	ENSDARG00000033170	12:827494-833453	-1	Dr.75045	CD014349	ZDB-GENE-061117-5	sult2st2
BI430190	0.989497	0.120801	0.704293	0.0645501	1.27204	0.271144	0.0882	ENSDART00000112345	ENSDARG00000074676	16:1225187-1237821	-1	Dr.82813	BI430190
BI475993	0.947933	0.122934	1.07044	0.122625	1.81083	0.304883	0.0882					Dr.83826	BI881658
BI476513	0.912903	0.135429	1.34331	0.13711	0.857785	0.11098	0.0882					Dr.7819	AW233640	ZDB-GENE-030131-7895	wu:fj39e03
BI476547	1.10902	0.105051	1.12065	0.0835952	1.64099	0.181197	0.0882	ENSDART00000076328	ENSDARG00000054172	21:36762307-36766175	1	Dr.76132	AI331563	ZDB-GENE-041114-91	pgrmc1
BI673745	0.807978	0.27745	1.3602	0.139589	0.893472	0.0868913	0.0882	ENSDART00000026831	ENSDARG00000017983	8:46954008-46974281	1	Dr.14543	BM316194	ZDB-GENE-081104-375	rtdr1	rhabdoid tumor deletion region gene 1	rhabdoid tumor deletion region gene 1	RTDR1	27156
BI705506	0.897823	0.124855	1.19624	0.0898053	0.842494	0.093283	0.0882	ENSDART00000017536	ENSDARG00000004174	25:17670327-17703687	1	Dr.75497	BI705506	ZDB-GENE-040915-1	cnot1	CCR4-NOT transcription complex, subunit 1	CCR4-NOT transcription complex, subunit 1	CNOT1	23019
BI705584	1.082	0.18397	1.23415	0.0825028	1.7549	0.184814	0.0882					Dr.80602	BI877643	ZDB-GENE-030131-5986	wu:fi28f11
BI705705	0.966528	0.0901903	0.824364	0.0408952	1.21473	0.148734	0.0882					Dr.83284	BI705705
BI708248	1.08785	0.139086	0.898499	0.121201	1.57511	0.229376	0.0882	ENSDART00000113080	ENSDARG00000074735	3:36771319-36788318	1	Dr.84250	BI709658	ZDB-GENE-050302-128	cog1	component of oligomeric golgi complex 1	component of oligomeric golgi complex 1	COG1	9382
BI708361	1.04675	0.195568	0.931751	0.0623609	1.39008	0.174692	0.0882	ENSDART00000058669	ENSDARG00000040113	11:725065-737017	1	Dr.151299	BI709730
BI709515	1.04774	0.168176	1.29983	0.189186	0.696691	0.0520155	0.0882	ENSDART00000082761	ENSDARG00000002912	11:25733715-25748095	1	Dr.150882	CV481660
BI845517	0.916543	0.164651	0.538518	0.0650116	0.90006	0.108792	0.0882
BI846672	0.987733	0.120029	0.541315	0.139788	1.16035	0.103896	0.0882	ENSDART00000073518	ENSDARG00000051827	7:55697470-55785431	-1	Dr.40663	BG728029	ZDB-GENE-040724-9	si:busm1-70b1.2
BI864401	1.26177	0.158521	1.06242	0.0800939	1.67071	0.198309	0.0882	ENSDART00000140020	ENSDARG00000094782	1:55373529-55381111	1	Dr.113712	CT605323	ZDB-GENE-060421-8264	zgc:136791
BI878754	1.05806	0.0906823	1.74167	0.179847	1.0851	0.0862914	0.0882	ENSDART00000125042	ENSDARG00000068157	5:31130155-31147397	-1	Dr.83090	BI887304	ZDB-GENE-040724-44	ehmt1a	euchromatic histone-lysine N-methyltransferase 1a	euchromatic histone-lysine N-methyltransferase 1	EHMT1	79813
BI885978	0.96151	0.127751	0.71554	0.0652686	1.30875	0.238355	0.0882	ENSDART00000102698	ENSDARG00000070150	19:43752192-43756946	1	Dr.78487	EV558545	ZDB-GENE-030131-2827	wu:fc18h06
BI886163	0.820704	0.223765	1.91804	0.278308	1.01528	0.187139	0.0882					Dr.24325	BI886163	ZDB-GENE-040426-1417	wdr77	WD repeat domain 77	WD repeat domain 77	WDR77	79084
BI887495	0.962833	0.0747274	1.01815	0.123212	0.671927	0.0705171	0.0882	ENSDART00000133482	ENSDARG00000094252	22:33021089-33022846	1	Dr.123733	BM005420
BI888150	1.09583	0.133777	0.938555	0.0823381	0.64305	0.0512327	0.0882	ENSDART00000039443	ENSDARG00000006260	6:6889762-6892921	-1	Dr.121796	CT617834	ZDB-GENE-040426-860	tuba8l4
BI891602	1.03261	0.130989	1.30961	0.105019	0.842082	0.122109	0.0882	ENSDART00000007482	ENSDARG00000005015	8:26561010-26569017	-1	Dr.75384	BG729126	ZDB-GENE-030131-9158	zgc:66430
BI891654	0.979283	0.0627578	1.12867	0.0944665	0.755595	0.0843226	0.0882	ENSDART00000011691	ENSDARG00000020623	3:37771271-37780655	-1	Dr.78968	CT673451	ZDB-GENE-000511-6	baxa	bcl2-associated X protein, a	BCL2-associated X protein	BAX	581
BI892022	0.904312	0.119368	1.11272	0.0783996	0.770057	0.0527131	0.0882					Dr.159056	FP107728
BM026705	1.22022	0.491795	1.7591	0.307119	0.896948	0.109762	0.0882					Dr.86142	BM005356
BM036992	1.00129	0.0931661	0.783545	0.0543873	0.982819	0.0372736	0.0882	ENSDART00000097535	ENSDARG00000067720	12:50542145-50549329	1	Dr.156398	CK146064
BM095252	0.927324	0.170272	0.976391	0.0942406	1.63963	0.17586	0.0882	ENSDART00000043956	ENSDARG00000029848	2:22117431-22134663	1	Dr.17305	BM095252	ZDB-GENE-070410-13	zgc:161973
BM182470	1.05274	0.138858	1.84589	0.143469	1.14438	0.175299	0.0882	ENSDART00000088329	ENSDARG00000061737	11:28797179-28927292	-1	Dr.79706	BM182470	ZDB-GENE-061110-100	zgc:154079
BM183894	1.12255	0.130471	1.25926	0.0930082	1.84767	0.22997	0.0882					Dr.75522	BG728930	ZDB-GENE-040426-2003	got1	glutamic-oxaloacetic transaminase 1, soluble	glutamic-oxaloacetic transaminase 1, soluble (aspartate aminotransferase 1)	GOT1	2805
BM184851	1.12027	0.130327	1.15515	0.166986	0.730172	0.0730195	0.0882	ENSDART00000140084	ENSDARG00000094850	10:15053596-15059803	1	Dr.123166	BM184851
ENSDART00000013733	1.07256	0.100492	1.34867	0.137139	0.8696	0.112539	0.0882	ENSDART00000082465	ENSDARG00000059361	19:1112201-1119410	-1	Dr.148360	NM_001130777	ZDB-GENE-060315-8	slc39a4	solute carrier family 39 (zinc transporter), member 4	solute carrier family 39 (zinc transporter), member 4	SLC39A4	55630
BI472636	1.21441	0.210127	2.03776	0.295555	1.30368	0.124846	0.0894	ENSDART00000124987	ENSDARG00000040004	19:23421010-23483912	1	Dr.52379	AL918184	ZDB-GENE-060503-475	pkhd1l1	polycystic kidney and hepatic disease 1 (autosomal recessive)-like 1	polycystic kidney and hepatic disease 1 (autosomal recessive)-like 1	PKHD1L1	93035
BI886878	1.16045	0.269915	1.07494	0.202385	0.595369	0.0846022	0.0894
AA605677	0.968498	0.234655	0.803317	0.0857953	0.510554	0.0747455	0.0898	ENSDART00000140167	ENSDARG00000093817	16:54738085-54740061	1	Dr.104496	CT706209	ZDB-GENE-051030-81	hmgn2	high-mobility group nucleosomal binding domain 2	high-mobility group nucleosomal binding domain 2	HMGN2	3151
L25273	0.922969	0.102683	1.39709	0.165991	0.905032	0.11392	0.0898	ENSDART00000129400	ENSDARG00000026531	10:29413530-29443235	-1	Dr.20912	CK704278	ZDB-GENE-990415-30	alcama	activated leukocyte cell adhesion molecule a	activated leukocyte cell adhesion molecule	ALCAM	214
AB023488	0.868784	0.247752	1.06826	0.161676	2.19434	0.563808	0.0919	ENSDART00000122271	ENSDARG00000045219	12:7149337-7151441	1	Dr.81256	CK711259	ZDB-GENE-990708-5	dkk1b	dickkopf 1b	dickkopf homolog 1 (Xenopus laevis)	DKK1	22943
AI585200	0.989427	0.083366	0.960642	0.0938255	0.683418	0.0646355	0.0919	ENSDART00000121531	ENSDARG00000040334	10:6838955-6850186	-1	Dr.132178	CT699631	ZDB-GENE-030131-2049	mat2aa	methionine adenosyltransferase II, alpha a	methionine adenosyltransferase II, alpha	MAT2A	4144
AI883721	0.813379	0.277509	1.14136	0.0506452	1.4423	0.113606	0.0919	ENSDART00000019136	ENSDARG00000014159	19:34270844-34289691	-1	Dr.77432	AI883721	ZDB-GENE-030616-615	mtdha	metadherin a	metadherin	MTDH	92140
AW232207	1.07085	0.227778	2.0823	0.42939	1.19077	0.0738466	0.0927
AW116004	0.906071	0.0800381	0.832976	0.0858433	1.13375	0.070171	0.0937	ENSDART00000014379	ENSDARG00000071691	12:11503762-11520747	-1	Dr.2951	EE213754	ZDB-GENE-030131-1269	uqcrc2b	ubiquinol-cytochrome c reductase core protein IIb	ubiquinol-cytochrome c reductase core protein II	UQCRC2	7385
BE556846	0.99841	0.061003	0.963496	0.0627507	0.652502	0.0918752	0.0954	ENSDART00000127487	ENSDARG00000016889	3:55433742-55441489	1	Dr.161	CT594849	ZDB-GENE-040426-1076	eif3g	eukaryotic translation initiation factor 3, subunit G	eukaryotic translation initiation factor 3, subunit G	EIF3G	8666
BM103297	1.0433	0.0619497	0.977969	0.0824865	0.710763	0.0700942	0.0961	ENSDART00000137505	ENSDARG00000031283	19:10082968-10095471	-1	Dr.81227	BI983136
AW420641	0.950333	0.119136	1.19891	0.0553339	0.905083	0.0911477	0.097
AW422164	0.976821	0.0828085	1.38748	0.110771	1.05976	0.0796799	0.0973	ENSDART00000032195	ENSDARG00000029768	12:12762306-12869701	1	Dr.106859	EB909175	ZDB-GENE-080220-45	zgc:171432
BM071848	1.07376	0.185326	1.12617	0.190978	1.84276	0.179505	0.0973	ENSDART00000092497	ENSDARG00000063344	24:21535654-21543114	1	Dr.76028	EB981395	ZDB-GENE-030131-8307	zgc:162943
AI601682	0.951315	0.114553	1.0161	0.130927	1.54865	0.186386	0.0992	ENSDART00000078031	ENSDARG00000055643	24:3235000-3241718	1	Dr.129450	CT602609
AW077282	1.11759	0.131722	0.653256	0.0815583	0.944524	0.0712779	0.0992	ENSDART00000088928	ENSDARG00000061929	24:31197613-31210562	-1	Dr.76765	EE201050	ZDB-GENE-060929-180	zgc:153980
AI957592	1.06531	0.116825	1.05832	0.0980161	0.784148	0.0645484	0.0995	ENSDART00000058162	ENSDARG00000006687	13:6470390-6484818	1	Dr.75936	GO938770	ZDB-GENE-050913-114	h2afy2	H2A histone family, member Y2	H2A histone family, member Y2	H2AFY2	55506
